# Supplementary material for: Geochemistry of the dissolved loads of rivers in Southeast Coastal Region, China: Anthropogenic impact on chemical weathering and carbon sequestration
Source: Copernicus journal article supplement (doi:10.5194/bg-2018-109), 2018-03-20
Supplement: Supplementary file [file bg-2018-109-AC4-supplement.pdf]

1 **Geochemistry of the dissolved loads of rivers in Southeast Coastal Region, China:**

2 **Anthropogenic impact on chemical weathering and carbon sequestration**

3 Wenjing Liu<sup>1,2,3,4</sup>, Zhifang Xu<sup>1,2,3,4\*</sup>, Huiguo Sun<sup>1,2,3,4</sup>, Tong Zhao<sup>1,2,3,4</sup>, Chao Shi<sup>1,4</sup>, Taoze Liu<sup>5</sup>

4 <sup>1</sup> Key Laboratory of Cenozoic Geology and Environment, Institute of Geology and  
5 Geophysics, Chinese Academy of Sciences, Beijing 100029, China

6 <sup>2</sup> CAS Center for Excellence in Life and Paleoenvironment, Beijing, 100044, China

7 <sup>3</sup> Institutions of Earth Science, Chinese Academy of Sciences, Beijing 100029, China

8 <sup>4</sup> University of Chinese Academy of Sciences, Beijing 100049, China

9 <sup>5</sup> State Key Laboratory of Environmental Geochemistry, Institute of Geochemistry, Chinese  
10 Academy of Sciences, Guiyang, Guizhou 550002, China

11 \* Corresponding author. zfxu@mail.iggcas.ac.cn (Zhifang Xu, Tel: +86 10 82998289)

12 **Abstract:**

13 Southeast coastal region is the most developed and populated area in China.  
14 Meanwhile, it has been the most severe acid rain impacted region for many years. The  
15 chemical compositions and carbon isotope ratio of dissolved inorganic carbon  
16 ( $\delta^{13}\text{C}_{\text{DIC}}$ ) of rivers were investigated to evaluate the chemical weathering and  
17 associated atmospheric  $\text{CO}_2$  consumption rates. Mass balance calculation indicated  
18 that the dissolved loads of major rivers in the Southeast Coastal Rivers Basin  
19 (SECRB) were contributed by atmospheric (14.3%, 6.6-23.4%), anthropogenic  
20 (15.7%, 0-41.1%), silicate weathering (39.5%, 17.8-74.0%) and carbonate weathering  
21 inputs (30.6%, 3.9-62.0%). The silicate and carbonate chemical weathering rates for  
22 these river watersheds were  $14.2\text{-}35.8 \text{ t km}^{-2} \text{ a}^{-1}$  and  $1.8\text{-}52.1 \text{ t km}^{-2} \text{ a}^{-1}$ , respectively.  
23 The associated mean  $\text{CO}_2$  consumption rate by silicate weathering for the whole  
24 SECRB were  $191 \times 10^3 \text{ mol km}^{-2} \text{ a}^{-1}$ . The chemical and  $\delta^{13}\text{C}_{\text{DIC}}$  evidences indicated  
25 that sulfuric and nitric acid (mainly from acid deposition) was significantly involved  
26 in chemical weathering of rocks. The calculation showed an overestimation of  $\text{CO}_2$   
27 consumption at  $0.19 \times 10^{12} \text{ g C a}^{-1}$  if sulfuric and nitric acid was ignored, which  
28 accounted for about 33.6% of the total  $\text{CO}_2$  consumption by silicate weathering in the  
29 SECRB. This study quantitatively highlights that the role of acid deposition in  
30 chemical weathering, suggesting that anthropogenic impact should be seriously  
31 considered in estimation of chemical weathering and associated  $\text{CO}_2$  consumption.

32 **Keywords:** Southeast Coastal Rivers Basin; Chemical weathering;  $\text{CO}_2$  consumption;  
33 acid deposition;

34

## 35 **1. Introduction**

36       Chemical weathering of rocks is a key process that links geochemical cycling of  
37 solid earth to the atmosphere and ocean. It provides nutrients to terrestrial and marine  
38 ecosystems and regulates the level of atmospheric CO<sub>2</sub>. As a net sink of atmospheric  
39 CO<sub>2</sub> on geologic timescales, estimation of silicate chemical weathering rates and the  
40 controlling factors are important issues related to long-term global climate change  
41 (e.g. Raymo and Ruddiman, 1992; Négrel et al. 1993; Berner and Caldeira, 1997;  
42 Gaillardet et al., 1999; Kump et al., 2000; Amiotte-Suchet et al., 2003; Oliva et al.,  
43 2003; Hartmann et al., 2009; Moon et al., 2014). As an important component in the  
44 Earth's Critical Zone (U.S. Nat. Res. Council Comm., 2001), river serves as an  
45 integrator of various natural and anthropogenic processes and products in a basin, and  
46 a carrier transporting the weathering products from continent to ocean. Therefore, the  
47 chemical compositions of river are widely used to evaluate chemical weathering and  
48 associated CO<sub>2</sub> consumption rates at catchment and/or continental scale, and examine  
49 their controlling factors (e.g., Edmond et al., 1995; Gislason et al., 1996; Galy and  
50 France-Lanord, 1999; Huh, 2003; Millot et al., 2002, 2003; Oliva et al., 2003; West et  
51 al., 2005; Moon et al., 2007; Noh et al., 2009; Shin et al., 2011; Calmels et al., 2011;  
52 Li, S., et al. 2014).

53       With the intensification of human activities, human perturbations to river basins  
54 have increased in frequency and magnitude (Raymond et al., 2008; Regnier et al.,  
55 2013; Li and Bush, 2015). It is important to understand how such perturbations

56 function on the current weathering systems and to predict how they will affect the  
57 Critical Zone of the future (Brantley and Lebedeva, 2011). In addition to CO<sub>2</sub>, other  
58 sources of acidity (such as sulfuric, nitric and organic acids) can also produce protons.  
59 These protons react with carbonate and silicate minerals, thus enhance rock chemical  
60 weathering rate and flux compared with only considering protons deriving from CO<sub>2</sub>  
61 dissolution (Calmels et al., 2007; Xu and Liu, 2010). The effect of other sourced  
62 proton (especially H<sup>+</sup> induced by SO<sub>2</sub> and NO<sub>x</sub> coming from anthropogenic activities)  
63 on chemical weathering is documented to be an important mechanism modifying  
64 atmospheric CO<sub>2</sub> consumption by rock weathering (Galy and France-Lanord, 1999;  
65 Semhi, et al., 2000; Spence and Telmer, 2005; Xu and Liu, 2007; Perrin et al., 2008;  
66 Gandois et al., 2011). Anthropogenic emissions of SO<sub>2</sub> was projected to provide 3 to 5  
67 times greater H<sub>2</sub>SO<sub>4</sub> to the continental surface than the pyrite oxidation originated  
68 H<sub>2</sub>SO<sub>4</sub> (Lerman et al., 2007). Therefore, increasing acid precipitation due to intense  
69 human activities nowadays could make this mechanism more prominently.

70       The role of acid precipitation on the chemical weathering and CO<sub>2</sub> consumption  
71 has been investigated in some river catchments (Amiotte-Suchet et al., 1995; Probst et  
72 al., 2000; Vries et al., 2003; Lerman et al., 2007; Xu and Liu, 2010). It has been  
73 documented that silicate rocks were more easily disturbed by acid precipitation during  
74 their weathering and soil leaching processes, because of their low buffering capacity  
75 (Reuss et al., 1987; Amiotte-Suchet et al., 1995). The disturbance could be intensive  
76 and cause a decrease of CO<sub>2</sub> consumption about 73% by weathering due to acid  
77 precipitation in the Strengbach catchment (Vosges Mountains, France), where is

78 dominated by crystalline rocks (Amiotte-Suchet et al., 1995). This highlights the  
79 importance of exploring anthropogenic impact on chemical weathering and CO<sub>2</sub>  
80 consumption under different background (e.g. lithology, climate, human activity  
81 intensity, and basin scale) for better constraining and estimation of acid precipitation  
82 effect on rock weathering. Asia, especially East Asia, is one of the world's major  
83 sulfur emissions areas. However, the effect of acid precipitation on silicate weathering  
84 and associated CO<sub>2</sub> consumption was not well evaluated in this area, especially lack  
85 of quantitative studies.

86 Acid precipitation affected about 30% of the territory of China (Fig. 1), and the  
87 seriously areas are mainly located in the east, the south and the center of China, where  
88 over 70% of cities were suffering from acid rain (Zhang et al., 2007a; State  
89 Environmental Protection Administration of China, 2009). Southeast coastal region of  
90 China is the most developed and populated area this country, dominated by Mesozoic  
91 magmatic rocks (mainly granite and volcanic rocks) in lithology. Meanwhile, the  
92 southeast coastal area has become one of the three major acid rain areas in China  
93 since the beginning of the 1990s (Larssen et al., 1999). It is seriously impacted by  
94 acid rain, with a volume-weighted mean value of pH lower than 4.5 for many years  
95 (Wang et al., 2000; Larssen and Carmichael, 2000; Zhao, 2004; Han et al., 2006;  
96 Larssen et al., 2006; Zhang et al., 2007a; Huang et al., 2008; Xu et al., 2011).  
97 Therefore, it is an ideal area for evaluating silicate weathering and the effect of acid  
98 rain. In the previous work, we have recognized and discussed the importance of  
99 sulfuric acid on the rock weathering and associated CO<sub>2</sub> consumption in Qiantang

100 river basin in this area (Liu et al., 2016). However, it is difficult to infer the  
101 anthropogenic impact on chemical weathering and CO<sub>2</sub> consumption in the whole  
102 southeast coastal area from the case study of the Qiantang basin, because of the  
103 variations on lithology, basin scale, runoff and anthropogenic background in a large  
104 acid deposition affected area. In this study, the chemical and carbon isotope  
105 composition of rivers in this area were first systematically investigated, in order to: (i)  
106 decipher the different sources of solutes and to quantify their contributions to the  
107 dissolved loads; (ii) calculate silicate weathering and associated CO<sub>2</sub> consumption  
108 rates; (iii) evaluate the effects of acid deposition on rock weathering and CO<sub>2</sub>  
109 consumption flux in the whole southeast coastal area.

## 110 **2. Natural setting of study area**

111 Southeast coastal region of China, where the landscape is dominated by  
112 mountainous and hilly terrain, and lacks the conditions for breeding large rivers. The  
113 rivers in this region is dominantly small and medium-sized due to the topographic  
114 limitation. Only 5 rivers in this region have length over 200 km and the drainage area  
115 over 10,000 km<sup>2</sup>, and they are in turn from north to south: Qiantangjiang (Qiantang)  
116 and Oujiang (Ou) in Zhejiang province; Minjiang (Min) and Jiulongjiang (Jiulong) in  
117 Fujian province; Han Jiang (Han) in Guangdong province (Fig. 1). Rivers in this  
118 region generally flow eastward or southward and finally inject into the East China Sea  
119 or the South China Sea (Fig. 1), and they are collectively named as ‘Southeast Coastal  
120 Rivers’ (SECRs).

121 The Southeast Coastal Rivers Basin (SECRB) belongs to the warm and humid

122 subtropical oceanic monsoon climate. The average annual temperature and  
123 precipitation are 17-21°C and 1400-2000 mm, respectively. The precipitation mainly  
124 happens during May to September, and the minimum and maximum temperature  
125 often occurs in January and July. This area is one of the most developed areas in  
126 China, with a population more than 190 million (mean density of ~470  
127 individuals/km<sup>2</sup>), but the population mainly concentrated in the coastal urban areas.  
128 The vegetation coverage of these river basins is more than 60%, mainly subtropical  
129 evergreen-deciduous broadleaf forest and mostly distributing in mountains area.  
130 Cultivated land, and industries and cities are mainly located in the plain areas and  
131 lower reach of these rivers.

132 Geologically, three regional-scale fault zones are distributed across the SECRB  
133 region (Fig. 1). They are the sub-EW-trending Shaoxing-Jiangshan fault zone, the  
134 NE-trending Zhenghe-Dapu fault zone, and the NE-trending Changle-Nanao fault  
135 zone (Shu et al., 2009). These fault zones dominate the direction of the mountains  
136 ridgelines and drainages, as well as the formation of the basins and bay. The Zhenghe-  
137 Dapu fault zone is a boundary line of Caledonian uplift belt and Hercynian-Indosinian  
138 depression zone. Mesozoic magmatic rocks are widespread in the southeast coastal  
139 region with a total outcrop area at about 240,000 km<sup>2</sup>. Over 90% of the Mesozoic  
140 magmatic rocks are granitoids (granites and rhyolites) and their volcanic counterpart  
141 with minor existence of basalts (Zhou et al., 2000, 2006; Bai et al., 2014). These crust-  
142 derived granitic rocks are mainly formed in the Yanshanian stage, and may have been  
143 related to multiple collision events between Cathaysia and Yangtze blocks and Pacific

144 plate (Zhou and Li, 2000; Xu et al., 2016). Among the major river basins, the  
145 proportions of magmatic rocks outcrop are about 36% in Qiantang river basin, above  
146 80% in Ou, Jiaoxi and Jin river basins, and around 60% in Min, Jiulong, Han and  
147 Rong river basins (Shi, 2014). The overlying Quaternary sediment in this area is  
148 composed of brown-yellow siltstones but is rarely developed. The oldest basement  
149 complex is composed of metamorphic rocks of greenschist and amphibolite facies.  
150 Sedimentary rocks categories into two types, one is mainly composed by red clastic  
151 rocks which cover more than 40,000 km<sup>2</sup> in the study area; the other occurs as  
152 interlayers within volcanic formations, including varicolored mudstones and  
153 sandstones. They are mainly distributed on the west of Zhenghe-Dapu fault zone  
154 (FJBGRM, 1985; ZJBGMR, 1989; Shu et al., 2009).

### 155 **3. Sampling and analytical method**

156 A total of 121 water samples were collected from mainstream and tributaries of  
157 the major rivers in the SECRB from July 8th to 31 of 2010 in the high-flow period  
158 (sample number and locations are shown in Fig. 1). 2-L water samples were collected  
159 in the middle channel of the river from bridges or ferries, or directly from the center  
160 of some shallow streams in the source area. The lower reaches sampling sites were  
161 selected distant away from the estuary to avoid the influence of seawater. Temperature  
162 (T), pH and electrical conductivity (EC) were measured in the field with a portable  
163 EC/pH meter (YSI-6920, USA). All of the water samples for chemical analysis were  
164 filtered in field through 0.22 μm Millipore membrane filter, and the first portion of the  
165 filtration was discarded to wash the membrane and filter. One portion filtrate were



166 stored directly in HDPE bottles for anion analysis and another were acidified to pH <  
167 2 with 6 M double sub-boiling distilled HNO<sub>3</sub> for cation analysis. All containers were  
168 previously washed with high-purity HCl and rinsed with Milli-Q 18.2 MΩ water.

169 HCO<sub>3</sub><sup>-</sup> was titrated with 0.005M HCl within 12 h after sampling. Cations (Na<sup>+</sup>,  
170 K<sup>+</sup>, Ca<sup>2+</sup> and Mg<sup>2+</sup>) were determined using Inductively Coupled Plasma Atomic  
171 Emission Spectrometer (ICP-AES) (IRIS Intrepid II XSP, USA). Anions (Cl<sup>-</sup>, F<sup>-</sup>,  
172 NO<sub>3</sub><sup>-</sup> and SO<sub>4</sub><sup>2-</sup>) were analyzed by ionic chromatography (IC) (Dionex Corporation,  
173 USA). Dissolved silica was determined by spectrophotometry using the molybdate  
174 blue method. Reagent and procedural blanks were measured in parallel to the sample  
175 treatment, and calibration curve was evaluated by quality control standards before,  
176 during and after the analyses of each batch of samples. Measurement reproducibility  
177 was determined by duplicated sample and standards, which showed ±3% precision for  
178 the cations and ±5% for the anions.

179 River water samples for carbon isotopic ratio (δ<sup>13</sup>C) of dissolved inorganic  
180 carbon (DIC) measurements were collected in 150 ml glass bottles with air-tight caps  
181 and preserved with HgCl<sub>2</sub> to prevent biological activity. The samples were kept  
182 refrigerated until analysis. For the δ<sup>13</sup>C measurements, the filtered samples were  
183 injected into glass bottles with phosphoric acid. The CO<sub>2</sub> was then extracted and  
184 cryogenically purified using a high vacuum line. δ<sup>13</sup>C isotopic ratios were analyzed on  
185 Finnigen MAT-252 stable isotope mass spectrometer at the State Key Laboratory of  
186 Environmental Geochemistry, Chinese Academy of Sciences. The results are  
187 expressed with reference to VPDB, as follows:

188 
$$\delta^{13}\text{C} = [((^{13}\text{C}/^{12}\text{C})_{\text{sample}} / (^{13}\text{C}/^{12}\text{C})_{\text{standard}}) - 1] \times 1000 \quad (1)$$

189 The  $\delta^{13}\text{C}$  measurement has an overall precision of 0.1‰. A number of duplicate  
190 samples were measured and the results show that the differences were less than the  
191 range of measurement accuracy.

#### 192 **4. Results**

193 The major parameter and ion concentrations of samples are given in Table 1. The  
194 pH values of water samples ranged from 6.50 to 8.24, with an average of 7.23. Total  
195 dissolved solids (TDS) of water samples varied from 35.3 to 205 mg l<sup>-1</sup>, with an  
196 average of 75.2 mg l<sup>-1</sup>. Compared with the major rivers in China, the average TDS  
197 was significantly lower than the Changjiang (224 mg l<sup>-1</sup>, Chetelat et al., 2008), the  
198 Huanghe (557 mg l<sup>-1</sup>, Fan et al., 2014) and the Zhujiang (190 mg l<sup>-1</sup>, Zhang et al.,  
199 2007b). However, the average TDS was comparable to the rivers draining silicate rock  
200 dominated areas, e.g. the upper Ganjiang in Ganzhou, south China (63 mg l<sup>-1</sup>, Ji and  
201 Jiang, 2012), the Amur in north China (70 mg l<sup>-1</sup>, Moon et al., 2009), the Xishui in  
202 Hubei, central China (101 mg l<sup>-1</sup>, Wu et al., 2013), and north Han river in South Korea  
203 (75.5 mg l<sup>-1</sup>, Ryu et al., 2008). Among the major rivers in the SECRB, the Qiantang  
204 had the highest TDS value (averaging at 121 mg l<sup>-1</sup>), and the Ou had the lowest TDS  
205 value (averaging at 48.8 mg l<sup>-1</sup>).

206 Major ion compositions are shown in the cation and anion ternary diagrams (Fig.  
207 2a and b). In comparison with rivers (e.g. the Wujiang and Xijiang) draining  
208 carbonate rocks dominated area (Han and Liu, 2004; Xu and Liu, 2010), these rivers  
209 in the SECRB have distinctly higher proportions of Na<sup>+</sup>, K<sup>+</sup>, and dissolved SiO<sub>2</sub>. As

210 shown in the Fig. 2, most samples have high  $\text{Na}^+$  and  $\text{K}^+$  proportions, with an average  
211 more than 50% (in  $\mu\text{mol l}^{-1}$ ) of the total cations, except for samples from the  
212 Qiantang. The concentrations of  $\text{Na}^+$  and  $\text{K}^+$  range from 43.5 to 555  $\mu\text{mol l}^{-1}$  and 42.9  
213 to 233  $\mu\text{mol l}^{-1}$ , with average values of 152 and 98  $\mu\text{mol l}^{-1}$ , respectively. The  
214 concentrations of dissolved  $\text{SiO}_2$  range from 98.5 to 370  $\mu\text{mol l}^{-1}$ , with an average of  
215 212  $\mu\text{mol l}^{-1}$ .  $\text{Ca}^{2+}$  and  $\text{Mg}^{2+}$  account for about 38% and 11.6% of the total cation  
216 concentrations.  $\text{HCO}_3^-$  is the dominant anion with concentrations ranging from 139 to  
217 1822  $\mu\text{mol l}^{-1}$ . On average, it comprises 60.6% (36-84.6%) of total anions on a molar  
218 basis, followed by  $\text{SO}_4^{2-}$  (14.6%),  $\text{Cl}^-$  (13.1%) and  $\text{NO}_3^-$  (11.8%). The major ionic  
219 compositions indicate that water chemistry of these rivers in the SECRB is controlled  
220 by silicate weathering. Meanwhile, it is also influenced by carbonate weathering,  
221 especially in the Qiantang river system.

222 The  $\delta^{13}\text{C}$  of dissolved inorganic carbon in the rivers of the SECRB are given in  
223 Table 1. The  $\delta^{13}\text{C}$  of the water samples show a wide range, from -11.0‰ to -24.3‰  
224 (average -19.4‰), and with majority falling between -15 and -23‰. The values are  
225 similar to rivers draining Deccan Traps (Das et al., 2005).

## 226 **5. Discussion**

227 The dissolved solids in river water are commonly from atmospheric and  
228 anthropogenic inputs and weathering of rocks within the drainage basin. It is  
229 necessary to quantify the contribution of different sources to the dissolved loads  
230 before deriving chemical weathering rates and associated  $\text{CO}_2$  consumption.

### 231 *5.1 Atmospheric and anthropogenic inputs*

232 To evaluate atmospheric inputs to river waters, chloride is the most common  
233 used reference. Generally, water samples that have the lowest Cl<sup>-</sup> concentrations are  
234 employed to correct the proportion of atmospheric inputs in a river system (Négrel et  
235 al., 1993; Gaillardet et al., 1997; Viers et al., 2001; Xu and Liu, 2007). In pristine  
236 areas, the concentration of Cl<sup>-</sup> in river water is assumed to be entirely derived from  
237 the atmosphere, provided that the contribution of evaporites is negligible (e.g. Stallard  
238 and Edmond, 1981; Négrel et al., 1993). In the SECRB, the lowest Cl<sup>-</sup> concentration  
239 was mainly found in the headwater of each river. According to the geologic setting, no  
240 salt-bearing rocks was found in these headwater area (FJBGRM, 1985; ZJBGMR,  
241 1989). In addition, these areas are mainly mountainous and sparsely populated.  
242 Therefore, we assumed that the lowest Cl<sup>-</sup> concentration of samples from the  
243 headwater of each major river came entirely from atmosphere.

244 The proportion of atmosphere-derived ions in the river waters can then be  
245 calculated by using the element/Cl ratios of the rain. Chemical compositions of rain in  
246 the studied area have been reported at different sites, including Hangzhou, Jinhua,  
247 Nanping, Fuzhou and Xiamen (Zhao, 2004; Zhang et al., 2007a; Huang et al., 2008;  
248 Cheng et al., 2011; Xu et al., 2011) (Fig. 1). The volume-weighted mean  
249 concentration of ions and Cl-normalized molar ratios are compiled in Table 2.  
250 According to this procedure, 6.6-23.4% (averaging 14.3%) of total dissolved cations  
251 in the major rivers of the SECRB originated from rain. Among the anions, SO<sub>4</sub><sup>2-</sup> and  
252 NO<sub>3</sub><sup>-</sup> in the rivers are mainly from the atmospheric input, averaging at 74.7% for  
253 SO<sub>4</sub><sup>2-</sup> and 68.6% for NO<sub>3</sub><sup>-</sup>, respectively.

254 As the most developed and populated areas in China, the chemistry of rivers in  
255 the SECRB could be significantly impacted by anthropogenic inputs.  $\text{Cl}^-$ ,  $\text{NO}_3^-$  and  
256  $\text{SO}_4^{2-}$  are commonly associated with anthropogenic sources and have been used as  
257 tracers of anthropogenic inputs in watershed. High concentrations of  $\text{Cl}^-$ ,  $\text{NO}_3^-$  and  
258  $\text{SO}_4^{2-}$  can be found at the lower reaches of rivers in the SECRB, and an obvious  
259 increase after flowing through plain areas and cities. This tendency indicates that river  
260 water chemistry is affected by anthropogenic inputs while passing through the  
261 catchments. After correcting for the atmospheric contribution to river waters, the  
262 following assumption is needed to quantitatively estimate the contributions of  
263 anthropogenic inputs. That is,  $\text{Cl}^-$  originates from only atmospheric and anthropogenic  
264 inputs, the excess of atmospheric  $\text{Cl}^-$  is regarded to present anthropogenic inputs and  
265 balanced by  $\text{Na}^+$ .

## 266 *5.2 Chemical weathering inputs*

267 Water samples were displayed on a plot of Na-normalized molar ratios (Fig. 3).  
268 The values of the world's large rivers (Gaillardet et al. 1999) are also shown in the  
269 figure. A best correlations between elemental ratios were observed for  $\text{Ca}^{2+}/\text{Na}^+$  vs.  
270  $\text{Mg}^{2+}/\text{Na}^+$  ( $R^2 = 0.95$ ,  $n = 120$ ) and  $\text{Ca}^{2+}/\text{Na}^+$  vs.  $\text{HCO}_3^-/\text{Na}^+$  ( $R^2 = 0.98$ ,  $n = 120$ ). The  
271 samples cluster on a mixing line mainly between silicate and carbonate end-members,  
272 closer to the silicate end-member, and with little evaporite contribution. This  
273 corresponds with the distribution of rock types in the SECRB. In addition, all water  
274 samples have equivalent ratios of  $(\text{Na}^+ + \text{K}^+)/\text{Cl}^-$  larger than one, indicating silicate  
275 weathering as the source of  $\text{Na}^+$  and  $\text{K}^+$  rather than chloride evaporites dissolution.

276 The geochemical characteristics of the silicate and carbonate end-members can  
277 be deduced from the correlations between elemental ratios and referred to literature  
278 data for catchments with well-constrained lithology. After correction for atmospheric  
279 inputs, the  $\text{Ca}^{2+}/\text{Na}^+$ ,  $\text{Mg}^{2+}/\text{Na}^+$  and  $\text{HCO}_3^-/\text{Na}^+$  of the river samples ranged from 0.31  
280 to 30, 0.16 to 6.7, and 1.1 to 64.2, respectively. According to the geological setting  
281 (Fig. 1), there are some small rivers draining purely silicate areas in the SECRs  
282 drainage basins. Based on the elemental ratios of these rivers, we assigned the silicate  
283 end-member for this study as  $\text{Ca}^{2+}/\text{Na}^+=0.41\pm 0.10$ ,  $\text{Mg}^{2+}/\text{Na}^+=0.20\pm 0.03$  and  $\text{HCO}_3^-$   
284  $/\text{Na}^+=1.7\pm 0.6$ . The ratio of  $(\text{Ca}^{2+}+\text{Mg}^{2+})/\text{Na}^+$  for silicate end-member was 0.61, which  
285 is close to the silicate end-member of world rivers ( $(\text{Ca}^{2+}+\text{Mg}^{2+})/\text{Na}^+=0.59\pm 0.17$ ,  
286 Gaillardet et al., 1999). Moreover, several previous researches have documented the  
287 chemical composition of rivers, such as the Amur and the Songhuajiang in North  
288 China, the Xishui in the lower reaches of the Changjiang, and major rivers in South  
289 Korea (Moon et al., 2009; Liu et al., 2013; Wu et al., 2013; Ryu et al., 2008; Shin et  
290 al., 2011). These river basins has similar lithological setting with the study area, we  
291 could further validate the composition of silicate end-member with their results.  
292  $\text{Ca}^{2+}/\text{Na}^+$  and  $\text{Mg}^{2+}/\text{Na}^+$  ratios of silicate end-member were reported for the Amur  
293 (0.36 and 0.22), the Songhuajiang ( $0.44\pm 0.23$  and 0.16), the Xishui ( $0.6\pm 0.4$  and  
294  $0.32\pm 0.18$ ), the Han (0.55 and 0.21) and six major rivers in South Korea (0.48 and  
295 0.20) in the studies above, well bracketing our estimation for silicate end-member.

296 Whereas, some samples show high concentrations of  $\text{Ca}^{2+}$ ,  $\text{Mg}^{2+}$  and  $\text{HCO}_3^-$ ,  
297 indicating the contribution of carbonate weathering. The samples collected in the

298 upper reaches (Sample 12 and 13) in the Qiantang fall close to the carbonate end-  
299 member documented for world large rivers (Gaillardet et al., 1999). In the present  
300 study,  $\text{Ca}^{2+}/\text{Na}^+$  ratio of  $0.41\pm 0.10$  and  $\text{Mg}^{2+}/\text{Na}^+$  ratio of  $0.20\pm 0.03$  for silicate end-  
301 member are used to calculate the contribution of  $\text{Ca}^{2+}$  and  $\text{Mg}^{2+}$  from silicate  
302 weathering. Finally, residual  $\text{Ca}^{2+}$  and  $\text{Mg}^{2+}$  are apportioned to carbonate weathering.

### 303 *5.3 Chemical weathering rate in the SECRBs*

304 Based on the above assumption, a forward model is employed to quantify the  
305 relative contribution of the different sources to the rivers of the SECRB in this study.  
306 (e.g. Galy and France-Lanord, 1999; Moon et al., 2007; Xu and Liu, 2007; 2010; Liu  
307 et al., 2013). The calculated contributions of different reservoir to the total cationic  
308 loads for large rivers and their major tributaries in the SECRB are presented in Fig. 4.  
309 On average, the dissolved cationic loads of the rivers in the study area originate  
310 dominantly from silicate weathering, which accounts for 39.5% (17.8-74.0%) of the  
311 total cationic loads in molar unit. Carbonate weathering and anthropogenic inputs  
312 account for 30.6% (3.9-62.0%) and 15.7% (0-41.1%), respectively. Contributions  
313 from silicate weathering are high in the Ou (55.6%), the Huotong (54.5%), the Ao  
314 (48.3%) and the Min (48.3%) river catchments, which dominated by granitic and  
315 volcanic bedrocks. In contrast, high contribution from carbonate weathering is  
316 observed in the Qiantang (54.0%), the Jin (52.2%) and the Jiulong (44.8%) river  
317 catchments. The results manifest the lithology control on river solutes of drainage  
318 basin.

319 The chemical weathering rate of rocks is estimated by the mass budget, basin

320 area and annual discharge (data from the Annual Hydrological Report P. R. China,  
321 2010, Table 3), expressed in  $\text{ton km}^{-2} \text{ a}^{-1}$ . The silicate weathering rate (SWR) is  
322 calculated using major cationic concentrations from silicate weathering and assuming  
323 that all dissolved  $\text{SiO}_2$  is derived from silicate weathering (Xu and Liu, 2010), as the  
324 equation below:

$$325 \quad \text{SWR} = ([\text{Na}]_{\text{sil}} + [\text{K}]_{\text{sil}} + [\text{Ca}]_{\text{sil}} + [\text{Mg}]_{\text{sil}} + [\text{SiO}_2]_{\text{riv}}) \times \text{discharge/area} \quad (2)$$

326 The assumption about Si could lead to overestimation of the silicate weathering  
327 rate, as part of silica may come from dissolution of biogenic sources rather than the  
328 weathering of silicate minerals (Millot et al., 2003; Shin et al., 2011). Thus, the  
329 cationic silicate weathering rates ( $\text{Cat}_{\text{sil}}$ ) were also calculated.

330 The carbonate weathering rate (CWR) is calculated based on the sum of  $\text{Ca}^{2+}$ ,  
331  $\text{Mg}^{2+}$  and  $\text{HCO}_3^-$  from carbonate weathering, with half of the  $\text{HCO}_3^-$  coming from  
332 carbonate weathering being derived from the atmosphere  $\text{CO}_2$ , as the equation below:

$$333 \quad \text{CWR} = ([\text{Ca}]_{\text{carb}} + [\text{Mg}]_{\text{carb}} + 1/2[\text{HCO}_3]_{\text{carb}}) \times \text{discharge/area} \quad (3)$$

334 The chemical weathering rate and flux are calculated for major rivers and their  
335 main tributaries in the SECRB, and the results are shown in Table 3. Silicate and  
336 carbonate weathering fluxes of these rivers (SWF and CWF) range from  $0.02 \times 10^6 \text{ t a}^{-1}$   
337  $^1$  to  $1.80 \times 10^6 \text{ t a}^{-1}$ , and from  $0.004 \times 10^6 \text{ t a}^{-1}$  to  $1.74 \times 10^6 \text{ t a}^{-1}$ , respectively. Among the  
338 rivers, the Min has the highest silicate weathering flux, and the Qiantang has the  
339 highest carbonate weathering flux. On the whole SECRB scale,  $3.95 \times 10^6 \text{ t a}^{-1}$  and  
340  $4.09 \times 10^6 \text{ t a}^{-1}$  of dissolved solids originating from silicate and carbonate weathering,  
341 respectively, are transported into the East and South China Sea by rivers in this



342 region. Compared with the largest three river basins (the Changjiang, the Huanghe  
343 and the Xijiang) in China, the flux of silicate weathering calculated for the SECRB is  
344 lower than the Changjiang ( $9.5 \times 10^6 \text{ t a}^{-1}$ , Gaillardet et al. 1999), but higher than the  
345 Huanghe ( $1.52 \times 10^6 \text{ t a}^{-1}$ , Fan et al., 2014) and the Xijiang ( $2.62 \times 10^6 \text{ t a}^{-1}$ , Xu and Liu,  
346 2010).

347 The silicate and carbonate chemical weathering rates for these river watersheds  
348 were  $14.2\text{-}35.8 \text{ t km}^{-2} \text{ a}^{-1}$  and  $1.8\text{-}52.1 \text{ t km}^{-2} \text{ a}^{-1}$ , respectively. The total rock  
349 weathering rate (TWR) for the whole SECRB is  $48.1 \text{ ton km}^{-2} \text{ a}^{-1}$ , higher than the  
350 world average ( $24 \text{ ton km}^{-2} \text{ a}^{-1}$ , Gaillardet et al., 1999). The cationic silicate  
351 weathering rates ( $\text{Cat}_{\text{sil}}$ ) ranges from 4.7 to  $12.0 \text{ ton km}^{-2} \text{ a}^{-1}$  for the river watersheds  
352 in the SECRB, averaging at  $7.8 \text{ ton km}^{-2} \text{ a}^{-1}$ . Furthermore, a good linear correlation  
353 ( $R^2 = 0.77$ ,  $n = 28$ ) is observed between the  $\text{Cat}_{\text{sil}}$  and runoff (Fig. 5), indicating  
354 silicate weathering rates is controlled by the runoff as documented in previous  
355 researches (e.g., Bluth and Kump, 1994; Gaillardet et al., 1999; Millot et al., 2002;  
356 Oliva et al., 2003; Wu et al., 2013; Pepin et al., 2013).

#### 357 *5.4 CO<sub>2</sub> consumption and the role of sulfuric acid*

358 To calculate atmospheric CO<sub>2</sub> consumption by silicate weathering (CSW) and by  
359 carbonate weathering (CCW), a charge-balanced state between rock chemical  
360 weathering-derived alkalinity and cations was assumed (Roy et al., 1999).

$$361 \quad [\text{CO}_2]_{\text{CSW}} = [\text{HCO}_3]_{\text{CSW}} = [\text{Na}]_{\text{sil}} + [\text{K}]_{\text{sil}} + 2[\text{Ca}]_{\text{sil}} + 2[\text{Mg}]_{\text{sil}} \quad (4)$$

$$362 \quad [\text{CO}_2]_{\text{CCW}} = [\text{HCO}_3]_{\text{CCW}} = [\text{Ca}]_{\text{carb}} + [\text{Mg}]_{\text{carb}} \quad (5)$$

363 The calculated CO<sub>2</sub> consumption rates by chemical weathering for the studied

364 rivers in SECRB are shown in Table 3. CO<sub>2</sub> consumption rates by carbonate and  
365 silicate weathering are from 17.9 to 530×10<sup>3</sup> mol km<sup>-2</sup> a<sup>-1</sup> (averaging at 206×10<sup>3</sup> mol  
366 km<sup>-2</sup> a<sup>-1</sup>) and from 167 to 460×10<sup>3</sup> mol km<sup>-2</sup> a<sup>-1</sup> (averaging at 281×10<sup>3</sup> mol km<sup>-2</sup> a<sup>-1</sup>)  
367 for major river catchments in the SECRB. The CO<sub>2</sub> consumption rates by silicate  
368 weathering in the SECRB are higher than that of major rivers in the world and China,  
369 such as the Amazon (174×10<sup>3</sup> mol km<sup>-2</sup> a<sup>-1</sup>, Mortatti and Probst, 2003), the  
370 Mississippi and the Mackenzie (66.8 and 34.1×10<sup>3</sup> mol km<sup>-2</sup> a<sup>-1</sup>, Gaillardet et al.,  
371 1999), the Changjiang (112×10<sup>3</sup> mol km<sup>-2</sup> a<sup>-1</sup>, Chetelat et al., 2008), the Huanghe  
372 (35×10<sup>3</sup> mol km<sup>-2</sup> a<sup>-1</sup>, Fan et al., 2014), the Xijiang (154×10<sup>3</sup> mol km<sup>-2</sup> a<sup>-1</sup>, Xu and  
373 Liu, 2010), the Longchuanjiang (173×10<sup>3</sup> mol km<sup>-2</sup> a<sup>-1</sup>, Li et al., 2011) and the  
374 Mekong (191×10<sup>3</sup> mol km<sup>-2</sup> a<sup>-1</sup>, Li et al., 2014) and three large rivers in eastern Tibet  
375 (103-121×10<sup>3</sup> mol km<sup>-2</sup> a<sup>-1</sup>, Noh et al., 2009), the Hanjiang in central China (120×10<sup>3</sup>  
376 mol km<sup>-2</sup> a<sup>-1</sup>, Li et al., 2009) and the Sonhuajiang in north China (66.6×10<sup>3</sup> mol km<sup>-2</sup>  
377 a<sup>-1</sup>, Liu et al., 2013). The high CO<sub>2</sub> consumption rates by silicate weathering in the  
378 SECRB could be attributed to extensive distribution of silicate rocks, high runoff,  
379 humid and hot climatic conditions. The regional fluxes of CO<sub>2</sub> consumption by  
380 silicate and carbonate weathering is about 47.9×10<sup>9</sup> mol a<sup>-1</sup> (0.57×10<sup>12</sup> g C a<sup>-1</sup>) and  
381 41.9×10<sup>9</sup> mol a<sup>-1</sup> (0.50×10<sup>12</sup> g C a<sup>-1</sup>) in the SECRB.

382         However, in addition to CO<sub>2</sub>, the anthropogenic sourced proton (e.g. H<sub>2</sub>SO<sub>4</sub> and  
383 HNO<sub>3</sub>) is well documented as significant proton providers in rock weathering process  
384 (Galy and France-Lanord, 1999; Karim and Veizer, 2000; Yoshimura et al., 2001; Han  
385 and Liu, 2004; Spence and Telmer, 2005; Lerman and Wu, 2006; Xu and Liu 2007;

386 2010; Perrin et al., 2008; Gandois et al., 2011). Sulfuric acid can be generated by  
387 natural oxidation of pyrite and anthropogenic emissions of SO<sub>2</sub> from coal combustion  
388 and subsequently dissolve carbonate and silicate minerals. The riverine nitrate in  
389 watersheds can be derived from atmospheric deposition, synthetic fertilizers,  
390 microbial nitrification, sewage and manure, etc. (e.g. Kendall 1998). Although it is  
391 difficult to determine the origin of nitrate in river waters, we can simply assume that  
392 nitrate from acid deposition is one of the providers of protons. The consumption of  
393 CO<sub>2</sub> by rock weathering would be overestimated if H<sub>2</sub>SO<sub>4</sub> and HNO<sub>3</sub> induced rock  
394 weathering is ignored (Spence and Telmer, 2005; Xu and Liu, 2010; Shin et al., 2011;  
395 Gandois et al., 2011). Thus, the role of the anthropogenic sourced protons on the  
396 chemical weathering is crucial for an accurate estimation of CO<sub>2</sub> consumption by rock  
397 weathering.

398 Rapid economic growth and increased energy demand have result in severe air  
399 pollution problems in China, indicated by the high levels of mineral acids  
400 (predominately sulfuric) observed in precipitation (Lassen and Carmichael, 2000; Pan  
401 et al., 2013; Liu et al., 2016). The national SO<sub>2</sub> emissions in 2010 reached to 30.8  
402 Tg/year (Lu et al., 2011). Previous study documented that fossil fuel combustion  
403 accounts for the dominant sulfur deposition (~77%) in China (Liu et al., 2016). The  
404 wet deposition rate of nitrogen peaked over the central and south China, with mean  
405 value of 20.2, 18.2 and 25.8 kg N ha<sup>-1</sup> yr<sup>-1</sup> in Zhejiang, Fujian and Guangdong  
406 province, respectively (Lu and Tian, 2007). Current sulfur and nitrogen depositions in  
407 the Southeast coastal region are still among the highest in China (Fang et al., 2013;

408 Cui et al., 2014; Liu et al., 2016).

409 The involvement of protons originating from  $\text{H}_2\text{SO}_4$  and  $\text{HNO}_3$  in the river  
410 waters can be verified by the stoichiometry between cations and anions, shown in Fig.  
411 6. In the rivers of the SECRB, the sum cations released by silicate and carbonate  
412 weathering were not balanced by  $\text{HCO}_3^-$  only (Fig. 6a), but were almost balanced by  
413 the sum of  $\text{HCO}_3^-$  and  $\text{SO}_4^{2-}$  and  $\text{NO}_3^-$  (Fig. 6b). This implies that  $\text{H}_2\text{CO}_3$  and  $\text{H}_2\text{SO}_4$   
414 and  $\text{HNO}_3$  are the potential erosion agents in chemical weathering in the SECRB. The  
415  $\delta^{13}\text{C}$  values of the water samples show a wide range, from -11.0‰ to -24.3‰, with an  
416 average of -19.4‰. The  $\delta^{13}\text{C}$  from soil is governed by the relative contribution from  
417  $\text{C}_3$  and  $\text{C}_4$  plant (Das et al., 2005). The studied areas have subtropical temperatures  
418 and humidity, and thus  $\text{C}_3$  processes are dominant. The  $\delta^{13}\text{C}$  of soil  $\text{CO}_2$  is derived  
419 primarily from  $\delta^{13}\text{C}$  of organic material which typically has a value of -24 to -34‰,  
420 with an average of -28‰ (Faure, 1986). According to previous studies, the average  
421 value for  $\text{C}_3$  trees and shrubs are from -24.4 to -30.5‰, and most of them are lower  
422 than -28‰ in south China (Chen et al., 2005; Xiang, 2006; Dou et al., 2013). After  
423 accounting for the isotopic effect from diffusion of  $\text{CO}_2$  from soil, the resulting  $\delta^{13}\text{C}$   
424 (from the terrestrial  $\text{C}_3$  plant process) should be  $\sim$  -25‰ (Cerling et al., 1991). This  
425 mean DIC derived from silicate weathering by carbonic acid (100% from soil  $\text{CO}_2$ )  
426 would yield a  $\delta^{13}\text{C}$  value of -25‰. Carbonate rocks are generally derived from marine  
427 system and, typically, have  $\delta^{13}\text{C}$  value close to zero (Das et al., 2005). Thus, the  
428 theoretical  $\delta^{13}\text{C}$  value of DIC derived from carbonate weathering by carbonic acid  
429 (50% from soil  $\text{CO}_2$  and 50% from carbonate rocks) is -12.5‰. DIC derived from

430 carbonate weathering by sulfuric acid are all from carbonate rocks, thus the  $\delta^{13}\text{C}$  of  
 431 the DIC would be 0‰. Based on these conclusions, sources of riverine DIC from  
 432 different end-members in the SECRB were plotted in Fig. 7. Most water samples drift  
 433 away from the three endmember mixing area (carbonate and silicate weathering by  
 434 carbonic acid and carbonate weathering by sulfuric acid) and towards the silicate  
 435 weathering by sulfuric acid area, clearly illustrating the effect of the anthropogenic  
 436 sourced protons on silicate weathering in the SECRB.

437 Considering the  $\text{H}_2\text{SO}_4$  and  $\text{HNO}_3$  effect on chemical weathering,  $\text{CO}_2$   
 438 consumption by silicate weathering can be determined from the equation below  
 439 (Moon et al., 2007; Ryu et al., 2008; Shin et al., 2011):

$$440 \quad [\text{CO}_2]_{\text{SSW}} = [\text{Na}]_{\text{sil}} + [\text{K}]_{\text{sil}} + 2[\text{Ca}]_{\text{sil}} + 2[\text{Mg}]_{\text{sil}} - \gamma \times [2\text{SO}_4 + \text{NO}_3]_{\text{atmos}} \quad (6)$$

441 Where  $\gamma$  is calculated by  $\text{cation}_{\text{sil}} / (\text{cation}_{\text{sil}} + \text{cation}_{\text{carb}})$ .

442 Based on the calculation in section 5.1,  $\text{SO}_4^{2-}$  and  $\text{NO}_3^-$  in river waters were  
 443 mainly derived from atmospheric input. Assuming  $\text{SO}_4^{2-}$  and  $\text{NO}_3^-$  in river waters  
 444 derived from atmospheric input (after correction for sea-salt contribution) are all from  
 445 acid precipitation,  $\text{CO}_2$  consumption rates by silicate weathering (SSW) are estimated  
 446 between  $55 \times 10^3 \text{ mol km}^{-2} \text{ a}^{-1}$  and  $286 \times 10^3 \text{ mol km}^{-2} \text{ a}^{-1}$  for major river watersheds in  
 447 the SECRB. For the whole SECRB, the actual  $\text{CO}_2$  consumption rates by silicate is  
 448  $191 \times 10^3 \text{ mol km}^{-2} \text{ a}^{-1}$  when the effect of  $\text{H}_2\text{SO}_4$  is considered. The flux of  $\text{CO}_2$   
 449 consumption is overestimated by  $16.1 \times 10^9 \text{ mol a}^{-1}$  ( $0.19 \times 10^{12} \text{ g C a}^{-1}$ ) due to the  
 450 involvement of sulfuric acid from acid precipitation, accounting for approximately  
 451 33.6% of total  $\text{CO}_2$  consumption flux by silicate weathering in the SECRB. It

452 highlights the fact that the drawdown of atmospheric CO<sub>2</sub> by silicate weathering can  
453 be significantly overestimated if acid deposition is ignored in short- and long-term  
454 perspectives. The result is important as it quantitatively shows that anthropogenic  
455 activities can significantly affect rock weathering and associated atmospheric CO<sub>2</sub>  
456 consumption. The quantification of this effect needs to be well evaluated in Asian and  
457 global scale within the current and future human activity background.

## 458 **6. Conclusions**

459 River waters in the Southeast coastal region of China are characterized by high  
460 proportions of Na<sup>+</sup>, K<sup>+</sup> and dissolved SiO<sub>2</sub>, indicating water chemistry of the rivers in  
461 the SECRB is mainly controlled by silicate weathering. The dissolved cationic loads  
462 of the rivers in the study area originate dominantly from silicate weathering, which  
463 accounts for 39.5% (17.8-74.0%) of the total cationic loads. Carbonate weathering,  
464 atmospheric and anthropogenic inputs account for 30.6%, 14.3% and 15.7%,  
465 respectively. Meanwhile, more than 70% of SO<sub>4</sub><sup>2-</sup> in the rivers derived from  
466 atmospheric input. The chemical weathering rate of silicates and carbonates for the  
467 whole SECRB are estimated to be approximately 23.7 and 24.5 ton km<sup>-2</sup> a<sup>-1</sup>. About  
468 8.04×10<sup>6</sup> t a<sup>-1</sup> of dissolved solids originating from rock weathering are transported  
469 into the East and South China Sea by these rivers. With the assumption that all the  
470 protons involved in the weathering reaction are provided by carbonic acid, the CO<sub>2</sub>  
471 consumption rates by silicate and carbonate weathering are 287 and 251×10<sup>3</sup> mol km<sup>-2</sup>  
472 a<sup>-1</sup>, respectively. However, both water chemistry and carbon isotope data provide  
473 evidence that sulfuric and nitric acid from acid precipitation serves as significant

474 agents during chemical weathering. Considering the effect of sulfuric and nitric acid,  
475 the CO<sub>2</sub> consumption rate by silicate weathering for the SECRB are  $191 \times 10^3 \text{ mol km}^{-2}$   
476  $\text{a}^{-1}$ . Therefore, the CO<sub>2</sub> consumption flux would be overestimated by  $16.1 \times 10^9 \text{ mol a}^{-1}$   
477  $(0.19 \times 10^{12} \text{ g C a}^{-1})$  in the SECRB if the effect of sulfuric and nitric acid is ignored.  
478 This work illustrates that anthropogenic disturbance by acid precipitation has  
479 profound impact on CO<sub>2</sub> sequestration by rock weathering.

480 **Acknowledgements.** This work was financially supported by Natural Science  
481 Foundation of China (Grant No. 41673020, 91747202, 41772380 and 41730857) and  
482 the "Strategic Priority Research Program" of the Chinese Academy of Sciences (Grant  
483 No. XDB15010405).

484 **References:**

- 485 Amiotte-Suchet, P., Probst, A. Probst, J.-L., Influence of acid rain on CO<sub>2</sub>  
486 consumption by rock weathering: local and global scales. *Water Air Soil Pollut.*  
487 85, 1563-1568, 1995.
- 488 Amiotte-Suchet, P., Probst, J.-L. Ludwig, W., Worldwide distribution of continental  
489 rock lithology: implications for the atmospheric/soil CO<sub>2</sub> uptake by continental  
490 weathering and alkalinity river transport to the oceans. *Global Biogeochem.*  
491 *Cycles* 17, 1038-1052, 2003.
- 492 Bai, H., Song, L.S., Xia, W.P., Prospect analysis of hot dry rock (HDR) in Eastern part  
493 of Jiangxi province, *Coal Geol. China* 26, 41-44. (In Chinese), 2014.
- 494 Berner, R.A., Caldeira, K., The need for mass balance and feedback in the  
495 geochemical carbon cycle. *Geology* 25, 955-956, 1997.

496 Bluth, G.J.S., Kump, L.R., Lithological and climatological controls of river chemistry.  
497 *Geochim. Cosmochim. Acta* 58, 2341-2359, 1994.

498 Brantley, S.L., Lebedeva, M., Learning to read the chemistry of regolith to understand  
499 the Critical Zone. *Annual Review of Earth and Planetary Sciences*, 39: 387-416,  
500 2011.

501 Calmels, D., Gaillardet, J., Brenot, A., France-Lanord, C., Sustained sulfide oxidation  
502 by physical erosion processes in the Mackenzie River basin: climatic  
503 perspectives. *Geology* 35, 1003-1006, 2007.

504 Calmels, D., Galy, A., Hovius, N., Bickle, M., West, A.J., Chen, M.-C., Chapman, H.,  
505 Contribution of deep groundwater to the weathering budget in a rapidly eroding  
506 mountain belt, Taiwan. *Earth Planet. Sci. Lett.* 303, 48-58, 2011.

507 Cerling, T.E., Solomon, D.K., Quade, J., Bownman, J.R., On the isotopic composition  
508 of soil CO<sub>2</sub>. *Geochim. Cosmochim. Acta* 55, 3403–3405, 1991.

509 Chen, Q., Shen, C., Sun, Y., Peng, S., Yi, W., Li Z., Jiang, M., Spatial and temporal  
510 distribution of carbon isotopes in soil organic matter at the Dinghushan  
511 Biosphere Reserve, South China. *Plant and Soil*, 273: 115–128, 2005.

512 Cheng, Y., Liu, Y., Huo, M., Sun, Q., Wang, H., Chen, Z., Bai, Y., Chemical  
513 characteristics of precipitation at Nanping Mangdang Mountain in eastern China  
514 during spring. *J. Environ. Sci.* 23, 1350-1358, 2011.

515 Chetelat, B., Liu, C., Zhao, Z., Wang, Q., Li, S., Li, J., Wang, B., Geochemistry of the  
516 dissolved load of the Changjiang Basin rivers: anthropogenic impacts and  
517 chemical weathering. *Geochim. Cosmochim. Acta* 72, 4254-4277, 2008.



518 Cui, J., Zhou, J., Peng, Y., He, Y., Yang, H., Mao, J., Atmospheric wet deposition of  
519 nitrogen and sulfur to a typical red soil agroecosystem in Southeast China  
520 during the ten-year monsoon seasons (2003-2012). *Atmos. Environ.* 82, 121-  
521 129, 2014.

522 Das, A., Krishnaswami, S., Sarin, M.M., Pande, K., Chemical weathering in the  
523 Krishna Basin and Western Ghats of the Deccan Traps, India: Rates of basalt  
524 weathering and their controls. *Geochim. Cosmochim. Acta* 69(8), 2067-2084,  
525 2005.

526 Dou, X., Deng, Q., Li, M., Wang, W., Zhang, Q., Cheng, X., Reforestation of *Pinus*  
527 *massoniana* alters soil organic carbon and nitrogen dynamics in eroded soil in  
528 south China. *Ecological Engineering* 52, 154-160, 2013.

529 Edmond, J.M., Palmer, M.R., Measures, C.I., Grant, B., Stallard, R.F., The fluvial  
530 geochemistry and denudation rate of the Guayana Shield in Venezuela,  
531 Colombia, and Brazil. *Geochim. Cosmochim. Acta* 59, 3301-3325, 1995.

532 Fan, B.L., Zhao, Z.Q., Tao, F.X., Liu, B.J., Tao, Z.H., Gao, S., He, M.Y.,  
533 Characteristics of carbonate, evaporite and silicate weathering in Huanghe River  
534 basin: A comparison among the upstream, midstream and downstream. *J. Asian*  
535 *Earth Sci.* 96, 17-26, 2014.

536 Fang, Y., Wang, X., Zhu, F., Wu, Z., Li, J., Zhong, L., Chen, D., Yoh, M., Three-  
537 decade changes in chemical composition of precipitation in Guangzhou city,  
538 southern China: has precipitation recovered from acidification following  
539 sulphur dioxide emission control? *Tellus B* 65, 1-15, 2013.

540 Faure, G., Principles of Isotope Geology. Wiley, Toronto, pp. 492-493, 1986.

541 FJBGMR: Fujian Bureau of Geology and Mineral Resources, Regional Geology of  
542 Fujian Province. Geol. Publ. House, Beijing, p. 671 (in Chinese with English  
543 abstract), 1985.

544 Gaillardet, J., Dupré, B., Allègre, C.J., Négrel, P., Chemical and physical denudation  
545 in the Amazon River basin. Chem. Geol. 142, 141-173, 1997.

546 Gaillardet, J., Dupré, B., Louvat, P., Allegre, C.J., Global silicate weathering and CO<sub>2</sub>  
547 consumption rates deduced from the chemistry of large rivers. Chem. Geol. 159,  
548 3-30, 1999.

549 Galy, A., France-Lanord, C., Weathering processes in the Ganges-Brahmaputra basin  
550 and the riverine alkalinity budget. Chem. Geol. 159, 31-60, 1999.

551 Gandois, L., Perrin, A.-S., Probst, A., Impact of nitrogenous fertilizer-induced proton  
552 release on cultivated soils with contrasting carbonate contents: A column  
553 experiment. Geochim. Cosmochim. Acta 75, 1185-1198, 2011.

554 Gislason, S.R., Arnorsson, S., Armannsson, H., Chemical weathering of basalt in  
555 southwest Iceland: effects of runoff, age of rocks and vegetative/glacial cover.  
556 Am. J. Sci. 296, 837-907, 1996.

557 Han, G., Liu, C.Q., Water geochemistry controlled by carbonate dissolution: a study  
558 of the river waters draining karst-dominated terrain, Guizhou Province, China.  
559 Chem. Geol. 204, 1-21, 2004.

560 Han, Z.W., Ueda, H., Sakurai, T., Model study on acidifying wet deposition in East  
561 Asia during wintertime. Atmos. Environ. 40, 2360-2373, 2006.

562 Hartmann, J., Jansen, N., Dürr, H.H., Kempe, S., Köhler, P., Global CO<sub>2</sub> consumption  
563 by chemical weathering: what is the contribution of highly active weathering  
564 regions? *Global Planet. Change* 69, 185-194, 2009.

565 Huang, K., Zhuang, G., Xu, C., Wang Y., Tang A., The chemistry of the severe acidic  
566 precipitation in Shanghai, China. *Atmos. Res.* 89, 149-160, 2008.

567 Huh, Y.S., Chemical weathering and climate - a global experiment: a review. *Geosci.*  
568 *J.* 7, 277-288, 2003.

569 Hydrological data of river basins in Zhejiang, Fujian province and Taiwan region,  
570 *Annual Hydrological Report P. R. China, 2010, Vol (7) (in Chinese)*

571 Ji, H., Jiang, Y., Carbon flux and C, S isotopic characteristics of river waters from a  
572 karstic and a granitic terrain in the Yangtze River system. *J. Asian Earth Sci.* 57,  
573 38-53, 2012.

574 Karim, A., Veizer, H.E., Weathering processes in the Indus River Basin: implication  
575 from riverine carbon, sulphur, oxygen and strontium isotopes. *Chem. Geol.* 170,  
576 153-177, 2000.

577 Kendall, C., Tracing nitrogen sources and cycling in catchments. In: Kendall, C., &  
578 McDonnell, J.J., (Eds) *Isotope Tracers in Catchment Hydrology*. Elsevier,  
579 Amsterdam, 1998.

580 Kump, L.R., Brantley, S.L., Arthur, M.A., Chemical weathering, atmospheric CO<sub>2</sub> and  
581 climate. *Ann. Rev. Earth Planet. Sci.* 28, 611-667, 2000.

582 Larssen, T., Carmichael, G.R., Acid rain and acidification in China: the importance of  
583 base cation deposition. *Environ. Poll.* 110, 89-102, 2000.

584 Larssen, T., Lydersen, E., Tang, D., He, Y., Gao, J., Liu, H., Duan, L., Seip, H.M.,  
585 Acid rain in China. *Environ. Sci. Technol.* 40, 418-425, 2006.

586 Lerman, A., Wu, L., CO<sub>2</sub> and sulfuric acid controls of weathering and river water  
587 composition. *J. Geochem. Explor.* 88, 427-430, 2006.

588 Lerman, A., Wu, L., Mackenzie, F.T., CO<sub>2</sub> and H<sub>2</sub>SO<sub>4</sub> consumption in weathering and  
589 material transport to the ocean, and their role in the global carbon balance. *Mar.*  
590 *Chem.* 106, 326-350, 2007.

591 Li, S., Bush, R.T., Changing fluxes of carbon and other solutes from the Mekong  
592 River. *Sci. Rep.* 5, 16005, 2015.

593 Li, S.Y., Lu, X.X., Bush, R.T., Chemical weathering and CO<sub>2</sub> consumption in the  
594 Lower Mekong River. *Sci. Total Environ.* 472, 162-177, 2014.

595 Li, S.Y., Lu, X.X., He, M., Zhou, Y., Bei, R., Li, L., Zieglera, A.D., Major element  
596 chemistry in the Upper Yangtze River: a case study of the Longchuanjiang  
597 River. *Geomorphology* 129, 29-42, 2011.

598 Li, S.Y., Xu, Z.F., Wang, H., Wang, J.H., Zhang, Q.F., Geochemistry of the upper Han  
599 River basin, China. 3: anthropogenic inputs and chemical weathering to the  
600 dissolved load. *Chem. Geol.* 264, 89-95, 2009.

601 Liu, B., Liu, C.-Q., Zhang, G., Zhao, Z.-Q., Li, S.-L., Hu, J., Ding, H., Lang, Y.-C.,  
602 Li, X.-D., Chemical weathering under mid- to cool temperate and monsoon-  
603 controlled climate: A study on water geochemistry of the Songhuajiang River  
604 system, northeast China. *Appl. Geochem.* 31, 265-278, 2013.

605 Liu, L., Zhang, X., Wang, S., Zhang, W., Lu, X., Bulk sulfur (S) deposition in China.

606 Atmos. Environ., 135, 41-49, 2016.

607 Liu, W., Shi, C., Xu, Z., Zhao, T., Jiang, H., Liang, C., Zhang, X., Zhou, Li., Yu, C.,  
608 Water geochemistry of the Qiantangjiang River, East China: Chemical  
609 weathering and CO<sub>2</sub> consumption in a basin affected by severe acid deposition.  
610 J.Asian Earth Sci., 127, 246-256, 2016.

611 Lu, C., Tian, H., Spatial and temporal patterns of nitrogen deposition in China:  
612 Synthesis of observational data. J. Geophys. Res. 112, D22S05, 2007.

613 Lu, Z., Zhang, Q., Streets, D.G., Sulfur dioxide and primary carbonaceous aerosol  
614 emissions in China and India, 1996e2010. Atmos. Chem. Phys. 11, 9839-9864,  
615 2011.

616 Millot, R., Gaillardet, J., Dupré, B., Allègre, C.J., Northern latitude chemical  
617 weathering rates: clues from the Mackenzie River Basin, Canada. Geochim.  
618 Cosmochim. Acta 67, 1305-1329, 2003.

619 Millot, R., Gaillardet, J., Dupré, B., Allègre, C.J., The global control of silicate  
620 weathering rates and the coupling with physical erosion: new insights from  
621 rivers of the Canadian Shield. Earth Planet. Sci. Lett. 196, 83-98, 2002.

622 Ministry of Environmental Protection of China, 2009. China Environmental Quality  
623 Report 2008. China Environmental Sciences Press, Beijing. In Chinese.

624 Moon, S., Chamberlain, C.P., Hilley, G.E., New estimates of silicate weathering rates  
625 and their uncertainties in global rivers. Geochim. Cosmochim. Acta 134, 257-  
626 274, 2014.

627 Moon, S., Huh, Y., Qin, J., van Pho, N., Chemical weathering in the Hong (Red) River

628 basin: Rates of silicate weathering and their controlling factors. *Geochim.*  
629 *Cosmochim. Acta* 71, 1411-1430, 2007.

630 Moon, S., Huh, Y., Zaitsev, A., Hydrochemistry of the Amur River: Weathering in a  
631 Northern Temperate Basin. *Aquat. Geochem.*, 15, 497-527, 2009.

632 Mortatti, J., Probst, J.L., Silicate rock weathering and atmospheric/soil CO<sub>2</sub> uptake in  
633 the Amazon basin estimated from river water geochemistry: seasonal and spatial  
634 variations. *Chem. Geol.*197, 177-196, 2003.

635 Négrel, P., Allègre, C.J., Dupré, B., Lewin, E., Erosion sources determined by  
636 inversion of major and trace element ratios and strontium isotopic ratios in river  
637 water: the Congo Basin Case. *Earth Planet. Sci. Lett.* 120, 59-76, 1993.

638 Noh, H., Huh, Y., Qin, J., Ellis, A., Chemical weathering in the Three Rivers region of  
639 Eastern Tibet. *Geochim. Cosmochim. Acta* 73, 1857-1877, 2009.

640 Oliva, P., Viers, J., Dupré B., Chemical weathering in granitic environments. *Chem.*  
641 *Geol.* 202, 225-256, 2003.

642 Pan, Y., Wang, Y., Tang, G., Wu, D., Spatial distribution and temporal variations of  
643 atmospheric sulfur deposition in Northern China: insights into the potential  
644 acidification risks. *Atmos. Chem. Phys.* 13, 1675-1688, 2013.

645 Pepin, E., Guyot, J.L., Armijos, E., Bazan, H., Fraizy, P., Moquet, J.S., Noriega, L.,  
646 Lavado, W., Pombosa, R. Vauchel, P., Climatic control on eastern Andean  
647 denudation rates (Central Cordillera from Ecuador to Bolivia). *J. S. Am. Earth*  
648 *Sci.* 44, 85-93, 2013.

649 Perrin, A.-S., Probst, A., Probst, J.-L., Impact of nitrogenous fertilizers on carbonate

650 dissolution in small agricultural catchments: Implications for weathering CO<sub>2</sub>  
651 uptake at regional and global scales. *Geochim, Cosmochim. Acta* 72, 3105-  
652 3123, 2008.

653 Probst, A., Gh'mari, A.El., Aubert, D., Fritz, B., McNutt, R., Strontium as a tracer of  
654 weathering processes in a silicate catchment polluted by acid atmospheric  
655 inputs, Strengbach, France. *Chem. Geol.* 170, 203-219, 2000.

656 Raymo, M.E., Ruddiman, W.F., Tectonic forcing of late Cenozoic climate. *Nature* 359,  
657 117-122, 1992.

658 Raymond, P. A., Oh, N.H., Turner, R.E., Broussard, W., Anthropogenically enhanced  
659 fluxes of water and carbon from the Mississippi River. *Nature* 451, 449-452,  
660 2008.

661 Regnier, P., Friedlingstein, P., Ciais, P., Mackenzie, F.T.,...Thullner. M.,  
662 Anthropogenic perturbation of the carbon fluxes from land to ocean. *Nature*  
663 *Geosci.* 6, 597-607. 2013.

664 Reuss, J.O., Cosby, B.J., Wright, R.F., Chemical processes governing soil and water  
665 acidification. *Nature* 329, 27-32, 1987.

666 Roy, S., Gaillardet, J., Allègre, C.J., Geochemistry of dissolved and suspended loads  
667 of the Seine river, France: anthropogenic impact, carbonate and silicate  
668 weathering. *Geochim. Cosmochim. Acta* 63, 1277-1292, 1999.

669 Ryu, J.S., Lee, K.S., Chang, H.W., Shin, H.S., Chemical weathering of carbonates and  
670 silicates in the Han River basin, South Korea. *Chem. Geol.* 247, 66-80, 2008.

671 Semhi, K., Amiotte Suchet, P., Clauer, N., Probst, J.-L., Impact of nitrogen fertilizers

672 on the natural weathering-erosion processes and fluvial transport in the Garonne  
673 basin. *Appl. Geochem.* 15 (6), 865-874, 2000.

674 Shi, C., Chemical characteristics and weathering of rivers in the Coast of Southeast  
675 China (PhD Thesis). Institute of Geology and Geophysics, Chinese academy of  
676 sciences, Beijing, China. pp, 1-100 (in Chinese with English abstract), 2014.

677 Shin, W.-J., Ryu, J.-S., Park, Y., Lee, K.-S., Chemical weathering and associated CO<sub>2</sub>  
678 consumption in six major river basins, South Korea. *Geomorphology* 129, 334-  
679 341, 2011.

680 Shu, L.S., Zhou, X.M., Deng, P., Wang, B., Jiang, S.Y., Yu, J.H., Zhao, X.X.,  
681 Mesozoic tectonic evolution of the Southeast China Block: New insights from  
682 basin analysis. *J. Asian Earth Sci.* 34(3), 376-391, 2009.

683 Spence, J., Telmer, K., The role of sulfur in chemical weathering and atmospheric  
684 CO<sub>2</sub> fluxes: Evidence from major ions,  $\delta^{13}\text{C}_{\text{DIC}}$ , and  $\delta^{34}\text{S}_{\text{SO}_4}$  in rivers of the  
685 Canadian Cordillera. *Geochim. Cosmochim. Acta* 69, 5441-5458, 2005.

686 Stallard, R.F., Edmond, J.M., Geochemistry of the Amazon. Precipitation chemistry  
687 and the marine contribution to the dissolved load at the time of peak discharge.  
688 *J. Geophys. Res.*, 86, 9844-9858, 1981.

689 U.S. Nat. Res. Council Comm., Basic Research Opportunities in Earth Science.  
690 Washington, DC: Nat. Acad. 154 pp., 2001.

691 Viers, J., Dupré, B., Braun, J.J., Freydier, R., Greenberg, S., Ngoupayou, J.N.,  
692 Nkamdjou, L.S., Evidence for non-conservative behavior of chlorine in humid  
693 tropical environments. *Aquat. Geochem.* 7, 127-154, 2001.



694 Vries, W.D., Reinds, G.J. Vel E., Intensive monitoring of forest ecosystems in Europe.  
695 2-Atmospheric deposition and its impacts on soil solution chemistry. *For. Ecol.*  
696 *Manage.* 174, 97-115, 2003.

697 Wang, T.J., Jin, L.S., Li, Z.K., Lam K.S., A modeling study on acid rain and  
698 recommended emission control strategies in China. *Atmos. Environ.* 34, 4467-  
699 4477, 2000.

700 West, A.J., Galy, A., Bickle, M., Tectonic and climatic controls on silicate weathering.  
701 *Earth Planet. Sci. Lett.* 235, 211-228, 2005.

702 Wu, W., Zheng, H., Yang, J., Luo, C., Zhou, B., Chemical weathering, atmospheric  
703 CO<sub>2</sub> consumption, and the controlling factors in a subtropical metamorphic-  
704 hosted watershed. *Chem. Geol.* 356, 141-150, 2013.

705 Xiang, L., Study on Coupling between Water and Carbon of Artificial Forests  
706 Communities in Subtropical Southern China. Master Dissertation, Institute of  
707 Geographical Sciences and Natural Sources, Chinese Academy of Sciences,  
708 China (in Chinese), 2006.

709 Xu, H., Bi, X-H., Feng, Y-C., Lin, F-M., Jiao, L., Hong, S-M., Liu, W-G., Zhang, X.-  
710 Y., Chemical composition of precipitation and its sources in Hangzhou, China.  
711 *Environ. Monit. Assess.* 183:581-592, 2011.

712 Xu, Y., Wang C.Y., Zhao T., Using detrital zircons from river sands to constrain major  
713 tectono-thermal events of the Cathaysia Block, SE China. *J. Asian Earth Sci.*  
714 124, 1-13, 2016.

715 Xu, Z., Liu, C.-Q., Chemical weathering in the upper reaches of Xijiang River

716 draining the Yunnan-Guizhou Plateau, Southwest China. *Chem. Geol.* 239, 83-  
717 95, 2007.

718 Xu, Z., Liu, C.-Q., Water geochemistry of the Xijiang basin rivers, South China:  
719 Chemical weathering and CO<sub>2</sub> consumption. *Appl. Geochem.* 25, 1603-1614,  
720 2010.

721 Yoshimura, K., Nakao, S., Noto, M., Inokura, Y., Urata, K., Chen, M., Lin, P.W.,  
722 Geochemical and stable isotope studies on natural water in the Taroko Gorge  
723 karst area, Taiwan - chemical weathering of carbonate rocks by deep source  
724 CO<sub>2</sub> and sulfuric acid. *Chem. Geol.* 177, 415–430, 2001.

725 Zhang, M., Wang, S., Wu, F., Yuan, X., Zhang, Y., Chemical compositions of wet  
726 precipitation and anthropogenic influences at a developing urban site in  
727 southeastern China. *Atmos. Res.* 84, 311-322, 2007a.

728 Zhang, S.R., Lu, X. X., Higgitt, D. L., Chen, C.T.A., Sun, H.-G., Han, J.T., Water  
729 chemistry of the Zhujiang (Pearl River): Natural processes and anthropogenic  
730 influences. *J. Geophys. Res.* 112, F01011, 2007b.

731 Zhao, W., An analysis on the changing trend of acid rain and its causes in Fujian  
732 Province. *Fujian Geogr.* 19, 1-5 (in Chinese), 2004.

733 Zhou, X.M., Li, W.X., Origin of Late Mesozoic igneous rocks in Southeastern China:  
734 Implications for lithosphere subduction and underplating of mafic magmas.  
735 *Tectonophysics* 326(3-4), 269-287, 2000.

736 Zhou, X.M., Sun, T., Shen, W.Z., et al., Petrogenesis of Mesozoic granitoids and  
737 volcanic rocks in South China: A response to tectonic evolution. *Episodes* 29(1),

738 26-33, 2006.

739 ZJBGMR: Zhejiang Bureau of Geology and Mineral Resources, Regional Geology of

740 Zhejiang Province. Geol. Publ. House, Beijing, p. 617 (in Chinese with English

741 abstract), 1989.

Table 1 Chemical and carbon isotopic compositions of river waters in the Southeast Coastal Rivers Basin (SECRB) of China.

| Rivers    | Sample number | Date (M/D/Y) | pH   | T °C  | EC $\mu\text{s cm}^{-1}$ | Na <sup>+</sup> $\mu\text{M}$ | K <sup>+</sup> $\mu\text{M}$ | Mg <sup>2+</sup> $\mu\text{M}$ | Ca <sup>2+</sup> $\mu\text{M}$ | F <sup>-</sup> $\mu\text{M}$ | Cl <sup>-</sup> $\mu\text{M}$ | NO <sub>3</sub> <sup>-</sup> $\mu\text{M}$ | SO <sub>4</sub> <sup>2-</sup> $\mu\text{M}$ | HCO <sub>3</sub> <sup>-</sup> $\mu\text{M}$ | SiO <sub>2</sub> $\mu\text{M}$ | TZ <sup>+</sup> $\mu\text{Eq}$ | TZ <sup>-</sup> $\mu\text{Eq}$ | NICB % | $\delta^{13}\text{C}$ ‰ | TDS mg l <sup>-1</sup> |
|-----------|---------------|--------------|------|-------|--------------------------|-------------------------------|------------------------------|--------------------------------|--------------------------------|------------------------------|-------------------------------|--------------------------------------------|---------------------------------------------|---------------------------------------------|--------------------------------|--------------------------------|--------------------------------|--------|-------------------------|------------------------|
| Qiantang* | 1             | 07-8-10      | 7.42 | 28.78 | 190                      | 347                           | 197                          | 106                            | 473                            | 12.0                         | 303                           | 62.6                                       | 147                                         | 1130                                        | 148                            | 1703                           | 1789                           | -5.0   | -19.0                   | 144                    |
|           | 2             | 07-9-10      | 7.60 | 23.84 | 146                      | 87.5                          | 204                          | 80.9                           | 496                            | 11.7                         | 75.2                          | 124                                        | 121                                         | 907                                         | 156                            | 1446                           | 1348                           | 6.7    | -19.8                   | 119                    |
|           | 3             | 07-9-10      | 7.37 | 27.83 | 308                      | 555                           | 233                          | 208                            | 698                            | 41.8                         | 312                           | 223                                        | 437                                         | 1170                                        | 170                            | 2601                           | 2579                           | 0.9    | -17.8                   | 204                    |
|           | 4             | 07-10-10     | 7.27 | 26.28 | 177                      | 176                           | 135                          | 116                            | 544                            | 15.7                         | 151                           | 142                                        | 170                                         | 985                                         | 175                            | 1632                           | 1618                           | 0.8    | -19.3                   | 135                    |
|           | 5             | 07-10-10     | 7.05 | 24.15 | 123                      | 130                           | 101                          | 66.2                           | 349                            | 17.7                         | 94.3                          | 124                                        | 157                                         | 529                                         | 169                            | 1061                           | 1061                           | 0.0    | -18.7                   | 91.2                   |
|           | 6             | 07-10-10     | 7.24 | 23.75 | 140                      | 97.6                          | 69.7                         | 81.0                           | 451                            | 20.0                         | 62.1                          | 109                                        | 204                                         | 703                                         | 164                            | 1231                           | 1282                           | -4.2   | -21.3                   | 106.6                  |
|           | 7             | 07-11-10     | 7.40 | 23.23 | 107                      | 92.5                          | 70.5                         | 68.3                           | 327                            | 14.9                         | 74.9                          | 104                                        | 147                                         | 486                                         | 156                            | 954                            | 960                            | -0.6   | -21.0                   | 82.2                   |
|           | 8             | 07-11-10     | 7.16 | 27.61 | 281                      | 361                           | 87.5                         | 128                            | 469                            | 26.8                         | 245                           | 191                                        | 239                                         | 810                                         | 179                            | 1642                           | 1724                           | -5.0   | -12.9                   | 137.5                  |
|           | 9             | 07-11-10     | 7.02 | 26.48 | 140                      | 275                           | 120                          | 60.7                           | 319                            | 36.2                         | 199                           | 150                                        | 180                                         | 437                                         | 236                            | 1155                           | 1146                           | 0.8    | -13.9                   | 100.2                  |
|           | 10            | 07-12-10     | 7.05 | 24.24 | 99                       | 205                           | 114                          | 58.3                           | 285                            | 14.6                         | 191                           | 114                                        | 132                                         | 305                                         | 278                            | 1005                           | 874                            | 13.1   | -20.9                   | 85.4                   |
|           | 11            | 07-12-10     | 7.05 | 27.01 | 102                      | 123                           | 133                          | 49.8                           | 284                            | 18.6                         | 86.5                          | 123                                        | 144                                         | 377                                         | 183                            | 924                            | 874                            | 5.4    | -19.2                   | 79.4                   |
|           | 12            | 07-12-10     | 7.99 | 24.18 | 260                      | 50.0                          | 85.4                         | 212                            | 993                            | -                            | 66.8                          | 153                                        | 235                                         | 1822                                        | 172                            | 2546                           | 2512                           | 1.4    | -17.6                   | 205.2                  |
|           | 13            | 07-12-10     | 7.86 | 24.59 | 231                      | 43.5                          | 88.4                         | 189                            | 859                            | -                            | 55.1                          | 97.6                                       | 169                                         | 1763                                        | 170                            | 2228                           | 2253                           | -1.1   | -18.7                   | 185.4                  |
|           | 14            | 07-12-10     | 7.69 | 22.66 | 131                      | 44.1                          | 81.0                         | 113                            | 458                            | -                            | 19.1                          | 95.2                                       | 107                                         | 920                                         | 143                            | 1266                           | 1248                           | 1.4    | -18.1                   | 106.8                  |
|           | 15            | 07-12-10     | 7.65 | 24.48 | 106                      | 61.1                          | 98.3                         | 87.9                           | 335                            | -                            | 37.2                          | 68.3                                       | 112                                         | 663                                         | 164                            | 1005                           | 992                            | 1.4    | -18.6                   | 87.3                   |
|           | 16            | 07-12-10     | 7.46 | 23.68 | 125                      | 64.3                          | 108                          | 117                            | 406                            | -                            | 25.9                          | 75.0                                       | 174                                         | 687                                         | 164                            | 1218                           | 1136                           | 6.7    | -20.0                   | 98.8                   |
|           | 17            | 07-13-10     | 7.33 | 24.08 | 139                      | 59.8                          | 116                          | 136                            | 429                            | -                            | 29.6                          | 80.4                                       | 209                                         | 752                                         | 162                            | 1305                           | 1281                           | 1.9    | -20.8                   | 108.1                  |
|           | 18            | 07-10-10     | 7.27 | 25.74 | 141                      | 163                           | 114                          | 69.6                           | 396                            | 27.3                         | 126                           | 148                                        | 161                                         | 597                                         | 153                            | 1209                           | 1195                           | 1.1    | -21.0                   | 101.0                  |
| Cao'e     | 19            | 07-16-10     | 7.17 | 22.27 | 108                      | 212                           | 86.3                         | 69.4                           | 183                            | 5.1                          | 151                           | 148                                        | 114                                         | 384                                         | 216                            | 803                            | 912                            | -13.5  | -21.2                   | 79.1                   |
|           | 20            | 07-16-10     | 7.06 | 26.57 | 182                      | 401                           | 77.6                         | 145                            | 275                            | 18.3                         | 269                           | 185                                        | 245                                         | 534                                         | 215                            | 1318                           | 1478                           | -12.2  | -20.5                   | 116.9                  |
|           | 21            | 07-16-10     | 7.14 | 27.26 | 171                      | 333                           | 91.3                         | 164                            | 362                            | 18.1                         | 224                           | 194                                        | 207                                         | 658                                         | 225                            | 1475                           | 1490                           | -1.0   | -20.9                   | 123.3                  |
|           | 22            | 07-16-10     | 7.08 | 27.17 | 173                      | 346                           | 94.4                         | 168                            | 364                            | 18.8                         | 247                           | 200                                        | 211                                         | 656                                         | 222                            | 1506                           | 1526                           | -1.3   | -13.0                   | 125.2                  |
| Ling      | 23            | 07-15-10     | 7.07 | 24.14 | 52                       | 164                           | 42.9                         | 34.9                           | 140                            | 4.9                          | 40.7                          | 61.5                                       | 68.3                                        | 277                                         | 190                            | 558                            | 516                            | 7.6    | -12.8                   | 52.1                   |
|           | 24            | 07-15-10     | 7.02 | 26.04 | 74                       | 169                           | 92.0                         | 34.2                           | 150                            | 6.4                          | 87.0                          | 77.3                                       | 92.8                                        | 272                                         | 196                            | 629                            | 622                            | 1.1    | -20.8                   | 59.5                   |
|           | 25            | 07-16-10     | 7.34 | 25.03 | 92                       | 159                           | 80.1                         | 47.3                           | 235                            | 19.3                         | 78.0                          | 71.4                                       | 105                                         | 455                                         | 187                            | 804                            | 815                            | -1.4   | -22.5                   | 73.9                   |
|           | 26            | 07-16-10     | 7.40 | 26.75 | 113                      | 216                           | 77.8                         | 57.1                           | 249                            | 20.2                         | 133                           | 90.0                                       | 115                                         | 494                                         | 196                            | 905                            | 946                            | -4.5   | -12.7                   | 82.8                   |
|           | 27            | 07-16-10     | 7.39 | 26    | 89                       | 174                           | 86.4                         | 56.4                           | 209                            | 9.0                          | 99.3                          | 78.4                                       | 99.9                                        | 420                                         | 199                            | 792                            | 798                            | -0.8   | -14.0                   | 72.7                   |
|           | 28            | 07-15-10     | 6.79 | 22.33 | 75                       | 159                           | 82.7                         | 44.1                           | 143                            | -                            | 107                           | 61.8                                       | 83.4                                        | 306                                         | 144                            | 616                            | 641                            | -4.1   | -21.1                   | 56.5                   |
|           | 29            | 07-15-10     | 8.24 | 27.15 | 129                      | 228                           | 92.1                         | 83.1                           | 317                            | 17.2                         | 177                           | 90.5                                       | 120                                         | 641                                         | 194                            | 1120                           | 1148                           | -2.5   | -19.2                   | 97.8                   |
| Ou        | 30            | 07-13-10     | 8.08 | 28.45 | 48                       | 95.2                          | 107                          | 38.4                           | 92.1                           | 15.2                         | 31.8                          | 43.3                                       | 47.4                                        | 291                                         | 221                            | 463                            | 461                            | 0.4    | -21.7                   | 50.6                   |
|           | 31            | 07-13-10     | 6.71 | 22.97 | 32                       | 60.7                          | 106                          | 12.6                           | 65.0                           | 10.8                         | 28.9                          | 45.0                                       | 48.9                                        | 158                                         | 169                            | 322                            | 329                            | -2.2   | -23.8                   | 36.9                   |
|           | 32            | 07-13-10     | 7.18 | 27.59 | 73                       | 107                           | 127                          | 36.2                           | 175                            | 4.3                          | 57.1                          | 111                                        | 92.0                                        | 283                                         | 210                            | 655                            | 634                            | 3.2    | -23.4                   | 62.9                   |
|           | 33            | 07-13-10     | 6.94 | 24.2  | 44                       | 76.9                          | 112                          | 20.0                           | 99.1                           | 10.9                         | 27.9                          | 63.1                                       | 58.6                                        | 249                                         | 184                            | 427                            | 457                            | -7.0   | -22.5                   | 47.5                   |
|           | 34            | 07-14-10     | 7.16 | 27.45 | 90                       | 187                           | 127                          | 41.2                           | 199.5                          | 17.0                         | 85.6                          | 102                                        | 116                                         | 367                                         | 251                            | 796                            | 787                            | 1.1    | -22.4                   | 76.5                   |
|           | 35            | 07-14-10     | 6.97 | 24.56 | 54                       | 105                           | 50.9                         | 29.2                           | 122                            | 12.2                         | 46.1                          | 67.8                                       | 73.1                                        | 218                                         | 193                            | 460                            | 478                            | -4.1   | -22.5                   | 47.9                   |
|           | 36            | 07-14-10     | 6.82 | 21.12 | 31                       | 76.4                          | 133                          | 12.7                           | 74.5                           | 7.7                          | 20.7                          | 36.8                                       | 49.1                                        | 192                                         | 162                            | 383                            | 348                            | 9.3    | -                       | 39.5                   |
|           | 37            | 07-14-10     | 6.82 | 23.69 | 45                       | 89.5                          | 105                          | 19.0                           | 97.8                           | 10.6                         | 39.6                          | 52.8                                       | 59.1                                        | 231                                         | 185                            | 428                            | 441                            | -3.0   | -22.9                   | 46.2                   |
|           | 38            | 07-15-10     | 6.92 | 24.69 | 37                       | 100                           | 89.3                         | 21.1                           | 49.7                           | 1.7                          | 36.9                          | 45.5                                       | 52.7                                        | 153                                         | 202                            | 331                            | 341                            | -2.9   | -                       | 38.9                   |
|           | 39            | 07-15-10     | 6.90 | 23.86 | 35                       | 92.2                          | 92.0                         | 19.8                           | 61.4                           | 1.9                          | 43.9                          | 47.9                                       | 55.5                                        | 139                                         | 193                            | 347                            | 342                            | 1.4    | -22.3                   | 38.5                   |
|           | 40            | 07-15-10     | 7.09 | 25.56 | 47                       | 117                           | 112                          | 25.7                           | 83.4                           | 8.0                          | 52.4                          | 63.1                                       | 57.4                                        | 232                                         | 193                            | 447                            | 462                            | -3.3   | -22.5                   | 48.1                   |
|           | 41            | 07-14-10     | 6.97 | 24.25 | 53                       | 102                           | 107                          | 27.6                           | 119                            | 13.4                         | 43.5                          | 59.4                                       | 73.2                                        | 277                                         | 183                            | 502                            | 526                            | -4.9   | -13.7                   | 52.3                   |

|         |    |          |      |       |      |      |      |      |      |      |      |      |      |     |     |      |      |      |       |       |
|---------|----|----------|------|-------|------|------|------|------|------|------|------|------|------|-----|-----|------|------|------|-------|-------|
| Feiyun  | 42 | 07-17-10 | 7.28 | 25.19 | 38   | 94.0 | 81.7 | 24.0 | 75.6 | 11.4 | 59.9 | 45.7 | 51.9 | 149 | 151 | 375  | 358  | 4.5  | -     | 37.2  |
|         | 43 | 07-17-10 | 7.08 | 25.61 | 46   | 101  | 79.9 | 33.9 | 93.4 | 4.6  | 66.2 | 55.1 | 52.8 | 223 | 151 | 435  | 450  | -3.3 | -23.7 | 43.5  |
| Jiaoxi  | 44 | 07-17-10 | 7.52 | 26.92 | 47   | 116  | 81.5 | 25.2 | 92.0 | 4.1  | 73.3 | 80.3 | 25.0 | 226 | 151 | 432  | 430  | 0.5  | -23.4 | 43.0  |
|         | 45 | 07-17-10 | 7.45 | 27.46 | 61   | 152  | 90.2 | 34.2 | 119  | -    | 136  | 59.8 | 53.5 | 238 | 184 | 548  | 542  | 1.2  | -23.1 | 51.8  |
|         | 46 | 07-18-10 | 6.90 | 27.66 | 53   | 127  | 88.1 | 33.4 | 94.4 | 7.0  | 123  | 93.1 | 30.4 | 209 | 177 | 471  | 486  | -3.3 | -14.4 | 47.4  |
| Huotong | 47 | 07-18-10 | 7.34 | 24    | 43   | 116  | 78.8 | 26.1 | 58.4 | 5.4  | 68.7 | 49.7 | 20.1 | 197 | 190 | 364  | 355  | 2.3  | -22.8 | 39.6  |
| Ao      | 48 | 07-19-10 | 7.24 | 31.44 | 124  | 294  | 121  | 102  | 209  | 24.3 | 204  | 73.6 | 52.0 | 717 | 370 | 1036 | 1100 | -6.1 | -19.4 | 105.4 |
|         | 49 | 07-19-10 | 7.13 | 27.82 | 46   | 109  | 96.3 | 30.0 | 73.8 | -    | 72.0 | 51.3 | 22.5 | 234 | 236 | 413  | 402  | 2.6  | -     | 46.2  |
|         | 50 | 07-18-10 | 6.98 | 28.65 | 53   | 140  | 88.4 | 40.8 | 100  | 3.0  | 82.9 | 58.6 | 20.9 | 294 | 233 | 511  | 477  | 6.6  | -22.3 | 52.2  |
| Min     | 51 | 07-27-10 | 7.11 | 28.4  | 42   | 116  | 92.0 | 40.5 | 119  | 18.0 | 43.9 | 35.5 | 26.0 | 382 | 182 | 526  | 513  | 2.4  | -19.4 | 52.7  |
|         | 52 | 07-27-10 | 7.17 | 30    | 51   | 102  | 97.9 | 41.7 | 107  | 4.6  | 29.4 | 45.3 | 35.0 | 350 | 221 | 496  | 495  | 0.2  | -     | 53.3  |
|         | 53 | 07-27-10 | 7.08 | 29.4  | 99   | 214  | 92.7 | 46.4 | 126  | 18.4 | 50.1 | 39.8 | 118  | 327 | 154 | 651  | 654  | -0.4 | -20.8 | 74.0  |
|         | 54 | 07-27-10 | 7.06 | 29.1  | 44   | 107  | 99.6 | 28.1 | 114  | 16.4 | 18.7 | 36.4 | 44.3 | 305 | 265 | 491  | 449  | 8.5  | -17.6 | 53.6  |
|         | 55 | 07-27-10 | 7.42 | 29.4  | 57   | 139  | 93.7 | 49.8 | 113  | 3.1  | 67.1 | 56.3 | 26.6 | 384 | 236 | 558  | 561  | -0.5 | -16.4 | 58.6  |
|         | 56 | 07-27-10 | 7.12 | 27.8  | 51   | 103  | 91.0 | 50.8 | 106  | 4.7  | 82.8 | 35.1 | 63.5 | 249 | 225 | 507  | 494  | 2.5  | -     | 51.3  |
|         | 57 | 07-27-10 | 7.08 | 27.5  | 40   | 125  | 45.0 | 36.8 | 107  | 12.1 | 43.6 | 44.5 | 29.3 | 288 | 211 | 457  | 435  | 5.0  | -21.1 | 47.4  |
|         | 58 | 07-27-10 | 6.99 | 27.2  | 52   | 121  | 98.0 | 42.4 | 115  | 16.7 | 87.1 | 36.6 | 70.9 | 277 | 228 | 535  | 542  | -1.4 | -11.4 | 55.3  |
|         | 59 | 07-27-10 | 6.87 | 29    | 59   | 154  | 91.4 | 59.4 | 124  | 16.5 | 77.8 | 36.7 | 88.3 | 272 | 222 | 612  | 563  | 8.0  | -20.3 | 57.2  |
|         | 60 | 07-27-10 | 7.31 | 27.1  | 78   | 109  | 92.1 | 59.1 | 181  | 21.2 | 123  | 37.5 | 78.4 | 355 | 202 | 682  | 672  | 1.4  | -18.7 | 63.1  |
|         | 61 | 07-27-10 | 7.22 | 27.8  | 37   | 122  | 83.3 | 52.8 | 142  | 17.4 | 111  | 37.3 | 80.4 | 288 | 221 | 596  | 597  | -0.2 | -22.3 | 58.1  |
|         | 62 | 07-27-10 | 7.16 | 28.1  | 58   | 104  | 83.3 | 59.3 | 163  | 24.0 | 34.6 | 34.5 | 118  | 294 | 214 | 632  | 599  | 5.2  | -13.4 | 59.5  |
|         | 63 | 07-27-10 | 7.26 | 28.3  | 87   | 139  | 86.1 | 60.9 | 191  | 14.8 | 48.0 | 93.0 | 109  | 347 | 226 | 729  | 707  | 3.0  | -21.4 | 68.6  |
|         | 64 | 07-27-10 | 7.00 | 28.8  | 87   | 127  | 93.1 | 58.7 | 195  | 6.6  | 59.8 | 81.1 | 60.9 | 480 | 232 | 729  | 743  | -2.0 | -11.0 | 74.0  |
|         | 65 | 07-28-10 | 6.97 | 27.9  | 37   | 163  | 82.1 | 52.2 | 140  | 20.2 | 53.1 | 60.0 | 106  | 306 | 221 | 630  | 632  | -0.2 | -     | 61.9  |
|         | 66 | 07-13-10 | 7.07 | 27.96 | 59   | 91.9 | 110  | 40.0 | 127  | 24.8 | 62.0 | 79.3 | 62.3 | 249 | 228 | 535  | 515  | 3.8  | -     | 54.8  |
|         | 67 | 07-28-10 | 7.12 | 29.7  | 38   | 108  | 93.4 | 45.9 | 133  | 12.4 | 48.3 | 34.0 | 56.6 | 368 | 220 | 560  | 564  | -0.7 | -     | 57.7  |
|         | 68 | 07-27-10 | 7.03 | 29.9  | 62   | 128  | 96.7 | 57.6 | 148  | 23.3 | 81.6 | 36.8 | 74.1 | 374 | 203 | 635  | 641  | -0.9 | -12.4 | 61.7  |
|         | 69 | 07-27-10 | 7.01 | 28.8  | 60   | 102  | 89.1 | 73.6 | 138  | 9.6  | 50.6 | 74.1 | 32.7 | 417 | 233 | 615  | 607  | 1.3  | -21.0 | 62.3  |
|         | 70 | 07-27-10 | 7.06 | 26.5  | 37   | 93.5 | 93.1 | 34.7 | 87.3 | -    | 26.6 | 34.8 | 37.1 | 312 | 222 | 431  | 448  | -3.9 | -13.1 | 49.1  |
|         | 71 | 07-27-10 | 7.09 | 26.5  | 25   | 62.6 | 92.7 | 27.0 | 61.5 | 4.7  | 21.5 | 18.6 | 43.4 | 191 | 154 | 332  | 318  | 4.2  | -16.0 | 35.3  |
|         | 72 | 07-28-10 | 7.07 | 30.1  | 39   | 76.3 | 87.9 | 35.1 | 87.6 | 7.4  | 43.1 | 36.6 | 35.5 | 266 | 175 | 409  | 416  | -1.7 | -19.4 | 43.5  |
|         | 73 | 07-27-10 | 7.01 | 28.7  | 47   | 84.9 | 95.4 | 56.7 | 106  | 12.7 | 51.8 | 49.2 | 57.2 | 315 | 211 | 506  | 531  | -4.8 | -     | 53.8  |
|         | 74 | 07-27-10 | 6.85 | 28.7  | 50   | 93.6 | 85.9 | 52.4 | 107  | 14.1 | 62.8 | 57.5 | 57.0 | 252 | 217 | 498  | 487  | 2.2  | -19.9 | 50.9  |
|         | 75 | 07-27-10 | 7.11 | 29.7  | 69   | 117  | 85.2 | 73.4 | 159  | 7.6  | 63.7 | 75.2 | 47.4 | 418 | 230 | 666  | 652  | 2.2  | -22.2 | 65.0  |
|         | 76 | 07-28-10 | 6.93 | 28.9  | 59   | 112  | 88.0 | 61.8 | 122  | 6.0  | 57.4 | 89.3 | 42.0 | 349 | 224 | 568  | 580  | -2.2 | -22.0 | 58.8  |
|         | 77 | 07-21-10 | 7.76 | 32.4  | 51.2 | 163  | 85.5 | 52.8 | 151  | 20.2 | 55.3 | 70.3 | 78.6 | 372 | 175 | 656  | 655  | 0.3  | -12.5 | 61.8  |
|         | 78 | 07-28-10 | 7.29 | 26.8  | 106  | 129  | 75.3 | 84.0 | 321  | 24.0 | 56.2 | 41.0 | 166  | 599 | 202 | 1013 | 1028 | -1.4 | -16.3 | 90.3  |
|         | 79 | 07-21-10 | 7.09 | 26.96 | 56   | 112  | 87.6 | 37.1 | 129  | 4.5  | 51.5 | 44.9 | 61.9 | 327 | 276 | 531  | 547  | -2.9 | -22.2 | 59.1  |
|         | 80 | 07-21-10 | 7.64 | 33.37 | 83   | 114  | 96.2 | 60.6 | 151  | 16.7 | 53.0 | 40.6 | 102  | 371 | 242 | 633  | 670  | -5.8 | -12.8 | 66.2  |
|         | 81 | 07-21-10 | 7.83 | 31.27 | 65   | 131  | 102  | 52.7 | 141  | 16.1 | 45.3 | 49.7 | 91.8 | 324 | 239 | 620  | 603  | 2.8  | -13.4 | 61.8  |
|         | 82 | 07-21-10 | 6.84 | 28.35 | 66   | 132  | 101  | 52.5 | 141  | 5.8  | 63.8 | 54.1 | 91.6 | 304 | 243 | 621  | 606  | 2.5  | -22.7 | 61.5  |
|         | 83 | 07-21-10 | 7.42 | 30.7  | 98   | 217  | 113  | 59.2 | 210  | 18.4 | 98.7 | 63.5 | 84.7 | 496 | 320 | 868  | 827  | 4.6  | -18.9 | 84.5  |
|         | 84 | 07-27-10 | 7.26 | 26.3  | 46   | 104  | 102  | 29.7 | 121  | 3.6  | 55.2 | 51.9 | 55.5 | 294 | 193 | 507  | 512  | -0.9 | -21.6 | 51.9  |
|         | 85 | 07-27-10 | 7.07 | 25.4  | 30   | 73.3 | 99.2 | 19.6 | 78.8 | -    | 22.9 | 40.0 | 49.2 | 203 | 170 | 369  | 365  | 1.3  | -21.1 | 39.8  |
|         | 86 | 07-27-10 | 7.50 | 27.3  | 45   | 102  | 102  | 26.5 | 114  | 2.4  | 35.1 | 39.7 | 57.2 | 260 | 217 | 484  | 449  | 7.3  | -15.7 | 49.6  |
|         | 87 | 07-27-10 | 7.47 | 26.9  | 51   | 141  | 100  | 43.6 | 109  | 7.9  | 79.7 | 42.4 | 57.7 | 311 | 217 | 547  | 548  | -0.3 | -20.1 | 55.6  |

|          |     |          |      |       |     |      |      |       |      |      |      |      |      |     |     |      |      |      |       |       |
|----------|-----|----------|------|-------|-----|------|------|-------|------|------|------|------|------|-----|-----|------|------|------|-------|-------|
|          | 88  | 07-19-10 | 7.99 | 31.74 | 63  | 167  | 96.5 | 33.5  | 115  | 8.0  | 105  | 35.5 | 38.1 | 331 | 218 | 561  | 548  | 2.3  | -13.5 | 55.9  |
|          | 89  | 07-21-10 | 6.77 | 28.19 | 65  | 132  | 93.6 | 56.0  | 145  | 15.6 | 60.6 | 78.8 | 75.4 | 333 | 243 | 627  | 624  | 0.5  | -22.6 | 63.3  |
| Jin      | 90  | 07-27-10 | 7.36 | 25.8  | 128 | 126  | 94.8 | 88.9  | 406  | 22.9 | 51.4 | 39.4 | 229  | 595 | 208 | 1211 | 1143 | 5.6  | -20.7 | 100   |
|          | 91  | 07-27-10 | 7.40 | 26.9  | 123 | 143  | 103  | 82.7  | 347  | 21.0 | 83.5 | 203  | 182  | 463 | 226 | 1105 | 1115 | -0.9 | -21.3 | 98.4  |
|          | 92  | 07-27-10 | 7.00 | 27.4  | 88  | 170  | 98.8 | 56.8  | 205  | 7.2  | 137  | 117  | 106  | 327 | 205 | 793  | 792  | 0.1  | -22.5 | 71.8  |
|          | 93  | 07-27-10 | 7.32 | 28.7  | 73  | 201  | 116  | 87.1  | 318  | 20.0 | 93.5 | 41.5 | 189  | 508 | 267 | 1128 | 1020 | 9.6  | -21.7 | 95.3  |
| Jiulong  | 94  | 07-30-10 | 6.50 | 23.47 | 29  | 72.3 | 92.4 | 22.8  | 59.8 | 12.4 | 25.1 | 27.0 | 50.0 | 189 | 213 | 330  | 341  | -3.4 | -18.1 | 40.1  |
|          | 95  | 07-30-10 | 7.06 | 29.35 | 120 | 136  | 96.9 | 106   | 339  | 5.1  | 67.7 | 66.3 | 249  | 469 | 202 | 1124 | 1100 | 2.1  | -20.8 | 94.2  |
|          | 96  | 07-30-10 | 7.45 | 27.6  | 104 | 79.5 | 97.5 | 106   | 363  | 14.4 | 70.7 | 50.0 | 99.9 | 729 | 184 | 1116 | 1049 | 6.0  | -18.9 | 93.7  |
|          | 97  | 07-31-10 | 7.36 | 26.59 | 139 | 140  | 100  | 142   | 432  | 15.5 | 79.6 | 78.3 | 274  | 573 | 196 | 1388 | 1278 | 8.0  | -19.7 | 108.8 |
|          | 98  | 07-31-10 | 7.72 | 26.18 | 88  | 77.6 | 96.2 | 69.0  | 313  | 19.9 | 39.7 | 34.6 | 63.8 | 731 | 251 | 938  | 933  | 0.5  | -18.4 | 89.4  |
|          | 99  | 07-30-10 | 7.43 | 26.96 | 119 | 200  | 93.8 | 100.2 | 298  | 19.9 | 122  | 80.5 | 225  | 387 | 202 | 1091 | 1040 | 4.7  | -20.5 | 89.5  |
|          | 100 | 07-28-10 | 7.41 | 26.66 | 112 | 173  | 97.9 | 94.4  | 286  | 46.1 | 118  | 152  | 201  | 364 | 207 | 1033 | 1036 | -0.3 | -20.9 | 92.2  |
|          | 101 | 07-29-10 | 7.16 | 29.35 | 82  | 151  | 110  | 55.4  | 178  | 4.9  | 71.2 | 170  | 53.2 | 385 | 305 | 727  | 732  | -0.7 | -21.2 | 76.1  |
|          | 102 | 07-29-10 | 7.10 | 28.9  | 100 | 222  | 98.3 | 49.4  | 249  | 3.6  | 126  | 157  | 52.7 | 532 | 303 | 917  | 920  | -0.3 | -21.7 | 90.0  |
|          | 103 | 07-28-10 | 7.20 | 31.15 | 138 | 339  | 111  | 81.2  | 277  | 9.2  | 280  | 285  | 88.6 | 515 | 317 | 1165 | 1256 | -7.8 | -19.0 | 112   |
|          | 104 | 07-28-10 | 7.16 | 27.09 | 101 | 261  | 95.8 | 81.7  | 235  | 40.3 | 173  | 80.1 | 174  | 291 | 136 | 990  | 892  | 9.9  | -24.3 | 75.4  |
| Zhang    | 105 | 07-28-10 | 8.08 | 30.6  | 93  | 195  | 96.1 | 61.1  | 167  | 16.8 | 157  | 193  | 55.2 | 281 | 288 | 748  | 741  | 0.9  | -21.5 | 73.8  |
| Dongxi   | 106 | 07-28-10 | 7.20 | 30.9  | 78  | 263  | 99.0 | 41.5  | 115  | 14.5 | 238  | 65.3 | 30.0 | 283 | 309 | 675  | 646  | 4.4  | -20.8 | 66.7  |
| Huangang | 107 | 07-28-10 | 7.40 | 30.5  | 99  | 253  | 85.6 | 53.0  | 154  | 7.7  | 190  | 63.5 | 56.4 | 460 | 278 | 754  | 827  | -9.6 | -20.0 | 77.4  |
| Han      | 108 | 07-31-10 | 7.31 | 27.1  | 68  | 136  | 61.5 | 45.2  | 195  | 16.1 | 37.7 | 45.3 | 93.7 | 345 | 218 | 678  | 615  | 9.2  | -21.9 | 62.0  |
|          | 109 | 07-30-10 | 7.38 | 26.94 | 88  | 116  | 103  | 63.6  | 265  | 6.4  | 53.4 | 72.2 | 84.9 | 584 | 244 | 876  | 879  | -0.4 | -20.4 | 83.7  |
|          | 110 | 07-30-10 | 6.66 | 25.55 | 71  | 114  | 96.2 | 47.6  | 168  | 8.0  | 56.9 | 54.6 | 143  | 230 | 203 | 642  | 628  | 2.2  | -17.9 | 59.7  |
|          | 111 | 07-30-10 | 6.66 | 27.76 | 83  | 135  | 104  | 63.8  | 203  | 8.6  | 54.5 | 74.9 | 173  | 302 | 336 | 774  | 777  | -0.4 | -20.6 | 78.7  |
|          | 112 | 07-30-10 | 7.31 | 30.81 | 56  | 168  | 74.0 | 39.1  | 118  | 13.5 | 62.9 | 44.4 | 81.4 | 237 | 245 | 556  | 507  | 8.8  | -21.4 | 54.6  |
|          | 113 | 07-31-10 | 7.28 | 28.73 | 98  | 137  | 99.3 | 85.6  | 270  | 9.2  | 88.8 | 59.1 | 118  | 565 | 233 | 948  | 949  | -0.1 | -19.7 | 86.6  |
|          | 114 | 07-31-10 | 7.27 | 31.42 | 123 | 193  | 105  | 98.2  | 319  | 20.7 | 120  | 102  | 157  | 570 | 229 | 1132 | 1107 | 2.2  | -19.7 | 98.2  |
|          | 115 | 07-30-10 | 7.43 | 29.89 | 85  | 115  | 97.5 | 65.5  | 244  | 6.5  | 46.5 | 58.6 | 103  | 511 | 251 | 832  | 822  | 1.1  | -20.8 | 79.3  |
|          | 116 | 07-31-10 | 7.61 | 30.98 | 99  | 123  | 104  | 85.9  | 264  | 5.6  | 58.8 | 90.9 | 108  | 588 | 98  | 926  | 952  | -2.9 | -20.0 | 79.4  |
|          | 117 | 07-31-10 | 7.31 | 29.96 | 93  | 151  | 103  | 78.1  | 250  | 15.4 | 68.0 | 99.1 | 173  | 379 | 233 | 909  | 891  | 1.9  | -21.9 | 81.8  |
|          | 118 | 07-31-10 | 7.35 | 28.4  | 2   | 233  | 84.2 | 101   | 323  | 12.8 | 84.0 | 101  | 203  | 460 | 229 | 1165 | 1051 | 9.8  | -21.1 | 94.7  |
|          | 119 | 07-31-10 | 7.67 | 30.38 | 93  | 136  | 87.8 | 73.6  | 231  | 16.4 | 64.6 | 94.4 | 184  | 382 | 226 | 834  | 909  | -9.1 | -20.8 | 80.5  |
| Rong     | 120 | 07-30-10 | 7.57 | 31.83 | 68  | 193  | 79.1 | 50.3  | 146  | 16.4 | 192  | 84.0 | 31.5 | 344 | 309 | 664  | 683  | -2.8 | -20.3 | 65.8  |
|          | 121 | 07-30-10 | 6.96 | 30.62 | 94  | 509  | 103  | 56.1  | 213  | 15.9 | 511  | 78.5 | 82.3 | 379 | 222 | 1150 | 1133 | 1.5  | -20.0 | 94.4  |

TZ<sup>+</sup> is the total cationic charge; TZ<sup>-</sup> is the total anionic charge; NICB is the normalized inorganic charge balance and TDS is the total dissolved solid. \*data of major ion composition from the previous work by Liu et al. 2016.

Table 2 Chemical compositions of precipitation at different sites located within the studied area (in  $\mu\text{mol l}^{-1}$  and molar ratio).

| Province | Location | pH   | F <sup>-</sup> | Cl <sup>-</sup> | NO <sub>3</sub> <sup>-</sup> | SO <sub>4</sub> <sup>2-</sup> | NH <sub>4</sub> <sup>+</sup> | K <sup>+</sup> | Na <sup>+</sup> | Ca <sup>2+</sup> | Mg <sup>2+</sup> | NO <sub>3</sub> /Cl | SO <sub>4</sub> /Cl | K/Cl | Na/Cl | Ca/Cl | Mg/Cl | Reference          |  |  |
|----------|----------|------|----------------|-----------------|------------------------------|-------------------------------|------------------------------|----------------|-----------------|------------------|------------------|---------------------|---------------------|------|-------|-------|-------|--------------------|--|--|
| Zhejiang | Hangzhou | 4.5  | 5.76           | 13.9            | 38.4                         | 55                            | 79.9                         | 4.18           | 12.2            | 26               | 3.53             | 2.76                | 3.96                | 0.3  | 0.88  | 1.87  | 0.25  | Xu et al., 2011    |  |  |
|          | Jinhua   | 4.54 | 9.05           | 8.51            | 31.2                         | 47.6                          | 81.1                         | 4.73           | 6.27            | 24               | 1.73             | 3.67                | 5.59                | 0.56 | 0.74  | 2.81  | 0.2   | Zhang et al., 2007 |  |  |
| Fujian   | Nanping  | 4.81 | 0.8            | 5.8             | 26.6                         | 18.3                          | 38                           | 4.9            | 5.4             | 12.9             | 2.7              | 4.59                | 3.16                | 0.84 | 0.93  | 2.22  | 0.47  | Cheng et al., 2011 |  |  |
|          | Fuzhou   |      | 5.26           | 21.4            | 24.9                         | 48.5                          | 78.1                         | 4.1            | 2.61            | 32.7             | 1.25             | 1.16                | 2.26                | 0.19 | 0.12  | 1.53  | 0.06  | Zhao, 2004         |  |  |
|          | Xiamen   | 4.57 | 15.3           | 23.7            | 22.1                         | 31.3                          | 37.7                         | 3.58           | 36.1            | 21.5             | 4.94             | 0.93                | 1.32                | 0.15 | 1.52  | 0.91  | 0.21  | Zhao, 2004         |  |  |
| Average  |          |      |                |                 |                              |                               |                              |                |                 |                  |                  | 2.62                | 3.26                | 0.41 | 0.84  | 1.87  | 0.24  |                    |  |  |

Table 3 Contribution of each reservoir, fluxes, chemical weathering and associated CO<sub>2</sub> consumption rates for the major rivers and their main tributaries in the SECRB.

| Major river | Tributaries | Location   | Discharge<br>10 <sup>9</sup> m <sup>3</sup> a <sup>-1</sup> | Area<br>10 <sup>3</sup> km <sup>2</sup> | Runoff<br>mm a <sup>-1</sup> | Contribution (%) |       |      |       | Fluxes<br>(10 <sup>6</sup> ton a <sup>-1</sup> ) |      | Weathering rate<br>(ton km <sup>-2</sup> a <sup>-1</sup> ) |                  |                  |                  | CO <sub>2</sub> consumption rate<br>(10 <sup>3</sup> mol km <sup>-2</sup> a <sup>-1</sup> ) |                  |                  |                  |
|-------------|-------------|------------|-------------------------------------------------------------|-----------------------------------------|------------------------------|------------------|-------|------|-------|--------------------------------------------------|------|------------------------------------------------------------|------------------|------------------|------------------|---------------------------------------------------------------------------------------------|------------------|------------------|------------------|
|             |             |            |                                                             |                                         |                              | Rain             | Anth. | Sil. | Carb. | SWF                                              | CWF  | Cat <sub>sil</sub> <sup>a</sup>                            | SWR <sup>b</sup> | CWR <sup>b</sup> | TWR <sup>b</sup> | CSW <sup>c</sup>                                                                            | CCW <sup>c</sup> | SSW <sup>d</sup> | SSW <sup>e</sup> |
| Qiantang    | Fuyang      |            | 43.81                                                       | 38.32                                   | 1143                         | 9                | 14    | 23   | 54    | 0.66                                             | 1.74 | 6.8                                                        | 17.3             | 45.3             | 62.6             | 223                                                                                         | 459              | 195              | 184              |
|             | Fenshui     | Tonglu     | 2.726                                                       | 3.100                                   | 879                          | 7                | 14    | 18   | 62    | 0.05                                             | 0.16 | 5.5                                                        | 14.7             | 52.1             | 66.8             | 167                                                                                         | 530              | 152              | 146              |
| Cao'e       |             | Huashan    | 2.610                                                       | 3.043                                   | 858                          | 7                | 23    | 26   | 44    | 0.06                                             | 0.11 | 6.8                                                        | 18.2             | 35.4             | 53.5             | 269                                                                                         | 369              | 240              | 229              |
| Ling        |             | Linhai     | 5.400                                                       | 6.613                                   | 817                          | 9                | 22    | 24   | 45    | 0.09                                             | 0.17 | 4.7                                                        | 14.2             | 26.1             | 40.3             | 167                                                                                         | 267              | 143              | 133              |
|             | Yonganxi    | Baizhiao   | 3.184                                                       | 2.475                                   | 1286                         | 14               | 15    | 50   | 21    | 0.06                                             | 0.03 | 9.1                                                        | 24.2             | 11.7             | 35.9             | 350                                                                                         | 119              | 255              | 216              |
|             | Shifengxi   | Shaduan    | 1.731                                                       | 1.482                                   | 1168                         | 11               | 19    | 35   | 36    | 0.03                                             | 0.04 | 7.6                                                        | 21.4             | 24.5             | 45.9             | 304                                                                                         | 249              | 249              | 227              |
| Ou          |             | Hecheng    | 20.65                                                       | 13.45                                   | 1536                         | 20               | 6     | 56   | 18    | 0.36                                             | 0.13 | 10.1                                                       | 26.9             | 9.9              | 36.9             | 360                                                                                         | 101              | 228              | 174              |
|             | Haoxi       | Huangdu    | 1.809                                                       | 1.270                                   | 1447                         | 16               | 8     | 46   | 30    | 0.04                                             | 0.02 | 9.9                                                        | 27.9             | 19.0             | 46.9             | 336                                                                                         | 192              | 246              | 210              |
|             | Xiaoxi      | Jupu       | 5.116                                                       | 3.336                                   | 1534                         | 23               | 0     | 74   | 4     | 0.09                                             | 0.01 | 11.4                                                       | 26.4             | 1.8              | 28.2             | 391                                                                                         | 18               | 202              | 125              |
|             | Nanxi       | Yongjiashi | 1.799                                                       | 1.273                                   | 1413                         | 21               | 9     | 63   | 7     | 0.03                                             | 0.00 | 10.0                                                       | 26.3             | 3.3              | 29.6             | 360                                                                                         | 34               | 200              | 135              |
| Huotong     |             | Yangzhong  | 3.470                                                       | 2.082                                   | 1667                         | 22               | 18    | 54   | 5     | 0.06                                             | 0.00 | 8.3                                                        | 27.3             | 2.1              | 29.4             | 305                                                                                         | 24               | 129              | 59               |
| Ao          |             | Lianjiang  | 2.770                                                       | 3.170                                   | 874                          | 17               | 17    | 48   | 17    | 0.05                                             | 0.02 | 5.1                                                        | 17.3             | 5.4              | 22.7             | 188                                                                                         | 56               | 122              | 95               |
| Min         |             | Zhuqi      | 84.59                                                       | 54.50                                   | 1552                         | 15               | 10    | 48   | 27    | 1.80                                             | 0.94 | 10.3                                                       | 33.0             | 17.3             | 50.2             | 390                                                                                         | 180              | 292              | 252              |
|             | Futun       | Yangkou    | 22.53                                                       | 12.67                                   | 1778                         | 15               | 14    | 49   | 22    | 0.45                                             | 0.21 | 12.0                                                       | 35.8             | 16.2             | 52.0             | 460                                                                                         | 171              | 336              | 286              |
|             | Shaxi       | Shaxian    | 12.87                                                       | 9.922                                   | 1297                         | 13               | 9     | 42   | 36    | 0.26                                             | 0.21 | 8.4                                                        | 26.5             | 21.7             | 48.1             | 315                                                                                         | 222              | 249              | 223              |
|             | Jianxi      | Qilijie    | 24.91                                                       | 14.79                                   | 1685                         | 16               | 10    | 45   | 29    | 0.48                                             | 0.26 | 9.6                                                        | 32.2             | 17.4             | 49.6             | 350                                                                                         | 185              | 250              | 210              |
|             | Youxi       | Youxi      | 5.237                                                       | 4.450                                   | 1177                         | 15               | 8     | 46   | 31    | 0.11                                             | 0.07 | 7.4                                                        | 24.5             | 15.0             | 39.5             | 272                                                                                         | 156              | 205              | 178              |
|             | Dazhangxi   | Yongtai    | 4.205                                                       | 4.034                                   | 1042                         | 15               | 21    | 47   | 17    | 0.08                                             | 0.03 | 6.6                                                        | 20.2             | 7.1              | 27.4             | 242                                                                                         | 73               | 163              | 131              |
| Jin         | Xixi        | Anxi       | 3.004                                                       | 2.466                                   | 1218                         | 9                | 10    | 29   | 52    | 0.06                                             | 0.10 | 7.9                                                        | 24.4             | 42.2             | 66.6             | 284                                                                                         | 430              | 247              | 232              |
|             | Dongxi      | Honglai    | 2.236                                                       | 1.704                                   | 1312                         | 12               | 22    | 28   | 38    | 0.04                                             | 0.04 | 6.8                                                        | 22.9             | 25.6             | 48.5             | 226                                                                                         | 263              | 178              | 158              |
| Jiulong     |             | Punan      | 10.20                                                       | 8.49                                    | 1201                         | 13               | 14    | 28   | 45    | 0.19                                             | 0.29 | 7.3                                                        | 22.2             | 34.0             | 56.2             | 263                                                                                         | 351              | 209              | 188              |
|             | Xi'xi       | zhengdian  | 4.080                                                       | 3.420                                   | 1193                         | 10               | 32    | 25   | 33    | 0.10                                             | 0.11 | 8.0                                                        | 30.7             | 30.9             | 61.6             | 288                                                                                         | 317              | 227              | 203              |
| Zhang       |             | Yunxiao    | 1.011                                                       | 1.038                                   | 974                          | 16               | 25    | 29   | 29    | 0.02                                             | 0.01 | 5.1                                                        | 21.9             | 14.1             | 36.0             | 174                                                                                         | 146              | 114              | 90               |
| Dongxi      |             | Zhao'an    | 1.176                                                       | 0.955                                   | 1231                         | 16               | 41    | 26   | 17    | 0.03                                             | 0.01 | 5.8                                                        | 28.7             | 10.2             | 38.9             | 187                                                                                         | 107              | 93               | 55               |
| Huanggang   |             | Raoping    | 1.637                                                       | 1.621                                   | 1010                         | 15               | 30    | 34   | 21    | 0.04                                             | 0.02 | 6.0                                                        | 22.8             | 11.1             | 33.9             | 227                                                                                         | 115              | 145              | 112              |
| Han         |             | Chao'an    | 24.75                                                       | 29.08                                   | 851                          | 16               | 7     | 38   | 39    | 0.49                                             | 0.50 | 5.4                                                        | 17.0             | 17.0             | 34.0             | 208                                                                                         | 176              | 156              | 135              |

|             |          |       |       |      |    |    |    |    |      |      |     |      |      |      |     |     |     |     |
|-------------|----------|-------|-------|------|----|----|----|----|------|------|-----|------|------|------|-----|-----|-----|-----|
| Ding        | Xikou    | 11.14 | 9.228 | 1207 | 17 | 6  | 46 | 32 | 0.31 | 0.18 | 9.0 | 33.3 | 19.1 | 52.4 | 341 | 196 | 249 | 212 |
| Mei         | Hengshan | 10.29 | 12.95 | 794  | 12 | 13 | 31 | 44 | 0.21 | 0.32 | 5.7 | 16.6 | 24.5 | 41.1 | 212 | 252 | 173 | 157 |
| Whole SECRB |          | 207   | 167   | 1240 |    |    |    |    | 3.95 | 4.09 | 7.8 | 23.7 | 24.5 | 48.1 | 287 | 251 | 218 | 191 |

<sup>a</sup>  $Cat_{sil}$  are calculated based on the sum of cations from silicate weathering.

<sup>b</sup> SWR, CWR and TWR represent silicate weathering rates (assuming all dissolved silica is derived from silicate weathering), carbonate weathering rates and total weathering rates, respectively.

<sup>c</sup>  $CO_2$  consumption rate with assumption that all the protons involved in the weathering reaction are provided by carbonic acid.

<sup>d</sup> Estimated  $CO_2$  consumption rate by silicate weathering when  $H_2SO_4$  from acid precipitation is taken into account.

<sup>e</sup> Estimated  $CO_2$  consumption rate by silicate weathering when  $H_2SO_4$  and  $HNO_3$  from acid precipitation is taken into account.



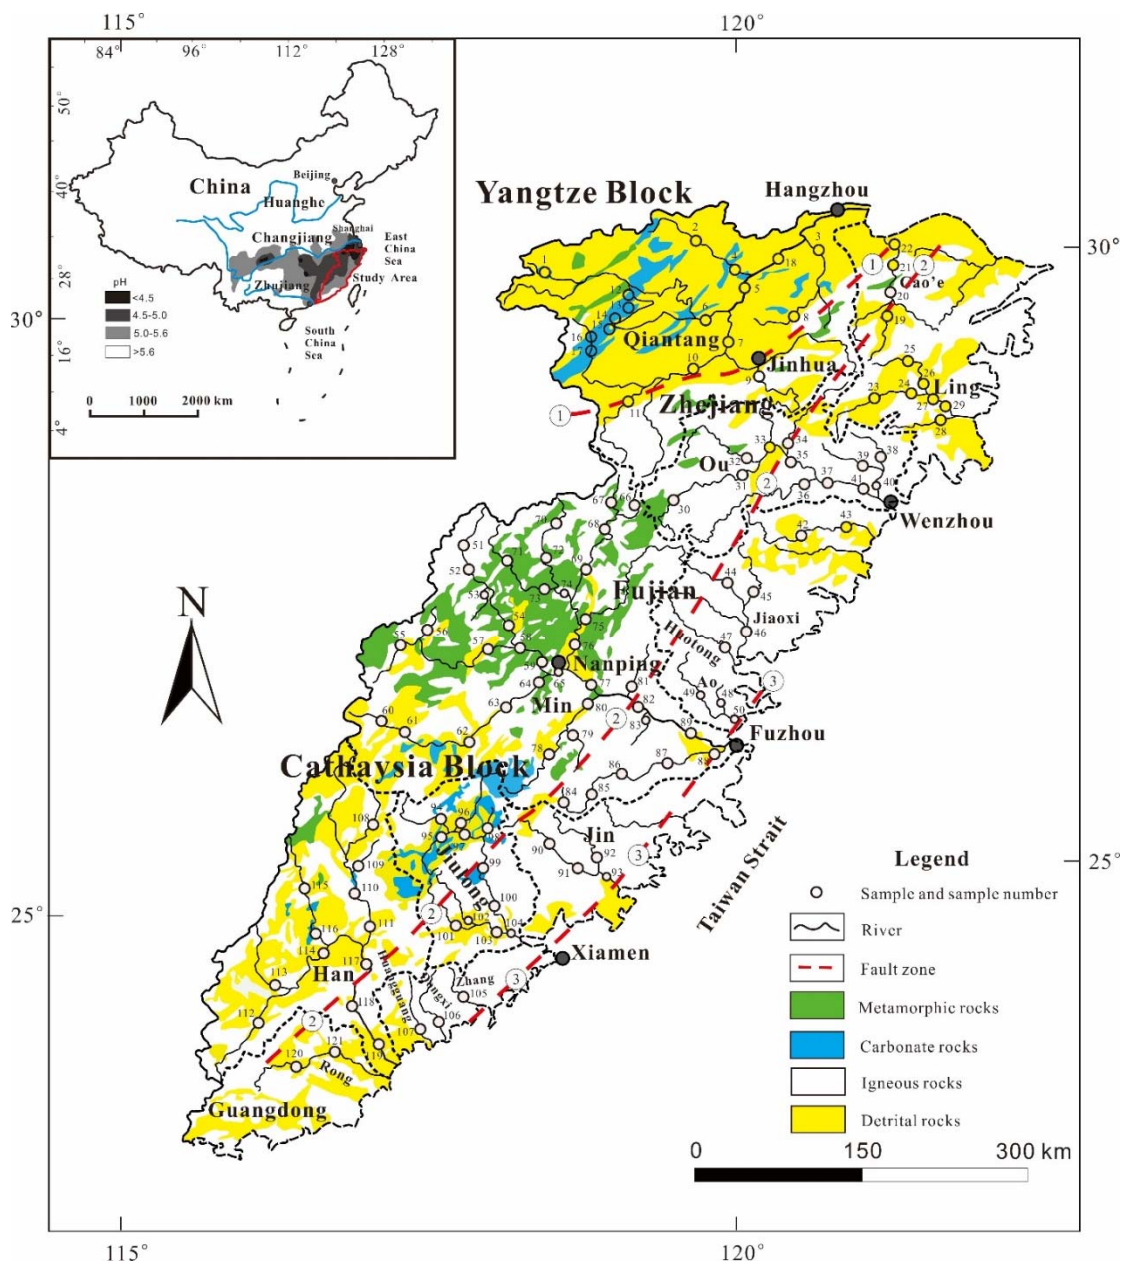

Fig. 1. Sketch map showing the lithology, sampling locations, and sample number of the SECRs drainage basin, and regional rain water pH ranges are shown in the sketch map at the upper-left. (modified from Zhou and Li, 2000; Shu et al., 2009; Xu et al., 2016, rain water acidity distribution of China mainland is from State Environmental Protection Administration of China). ①Shaoxing-Jiangshan fault zone; ②Zhenghe-Dapu fault zone; ③Changle-Nanao fault zone. The figure was created by CorelDraw software version 17.1.

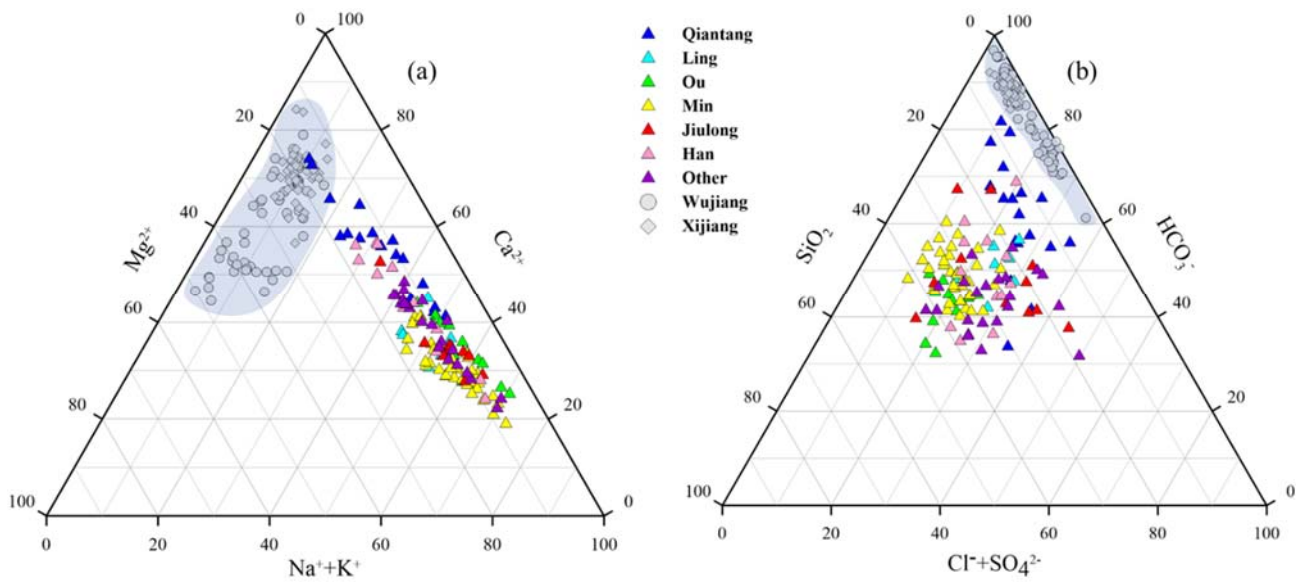

Fig. 2. Ternary diagrams showing cations (a), anions and dissolved  $SiO_2$  (b) compositions of river waters in the SECRB. Chemical compositions from case studies of rivers draining carbonate rocks (the Wujiang and the Xijiang) are also shown for comparison (data from Han and Liu 2004; Xu and Liu 2007, 2010)

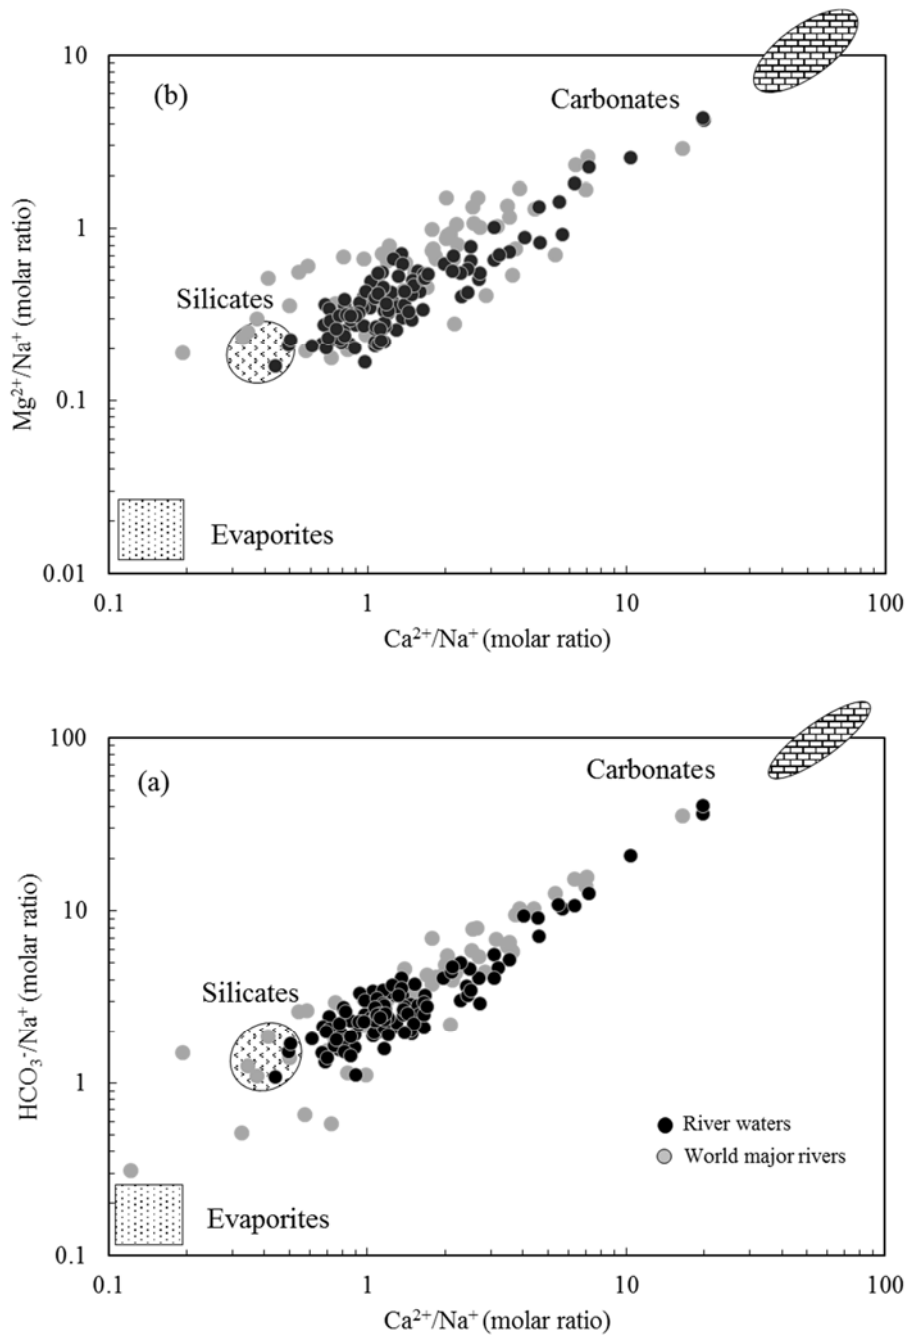

Fig. 3. Mixing diagrams using Na-normalized molar ratios:  $\text{HCO}_3^-/\text{Na}^+$  vs.  $\text{Ca}^{2+}/\text{Na}^+$  (a) and  $\text{Mg}^{2+}/\text{Na}^+$  vs.  $\text{Ca}^{2+}/\text{Na}^+$  (b) for the SECRB. The samples mainly cluster on a mixing line between silicate and carbonate end-members. Data for world major rivers are also plotted (data from Gaillardet et al. 1999).

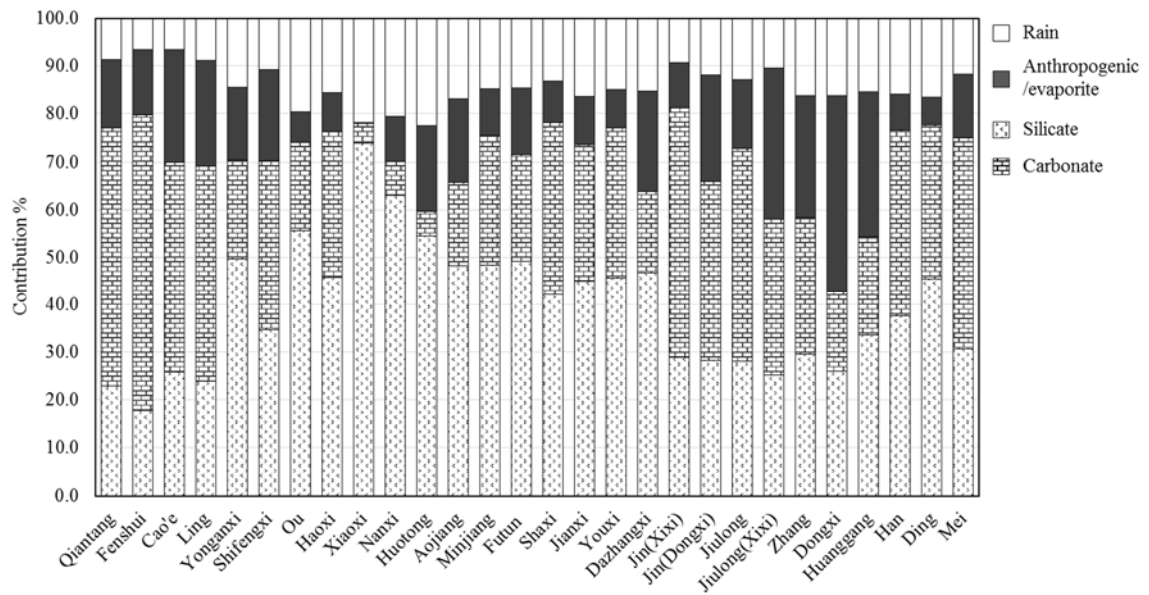

Fig. 4. Calculated contributions (in %) from the different reservoirs to the total cationic load for major rivers and their main tributaries in the SECRB. The cationic load is equal to the sum of  $\text{Na}^+$ ,  $\text{K}^+$ ,  $\text{Ca}^{2+}$  and  $\text{Mg}^{2+}$  from the different reservoirs.

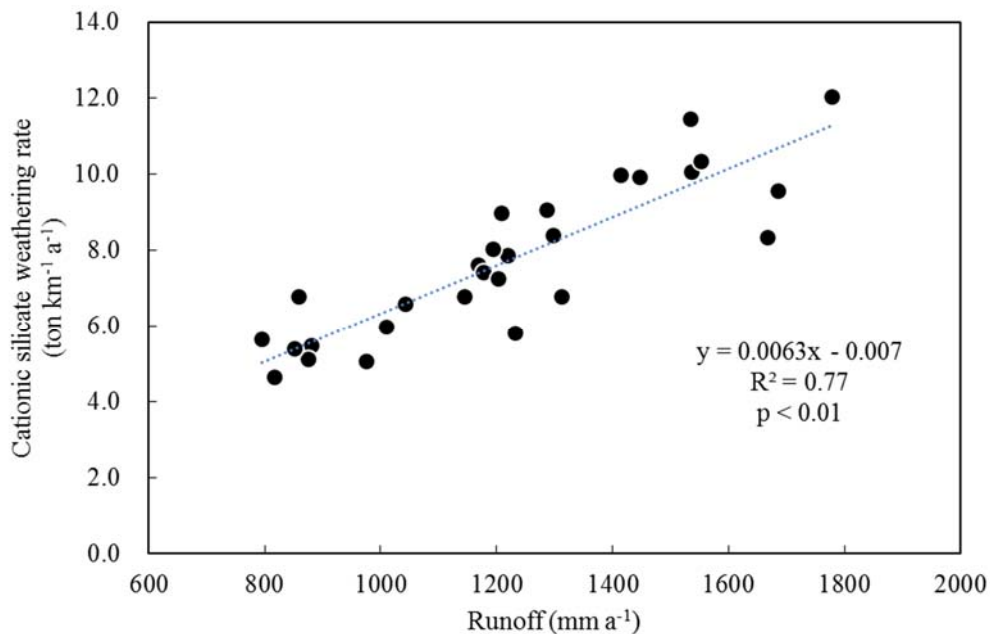

Fig. 5. Plots of the cationic-silicate weathering rate ( $\text{Cat}_{\text{sil}}$ ) vs. runoff for the SECRB, showing that the silicate weathering rates is controlled by the runoff.

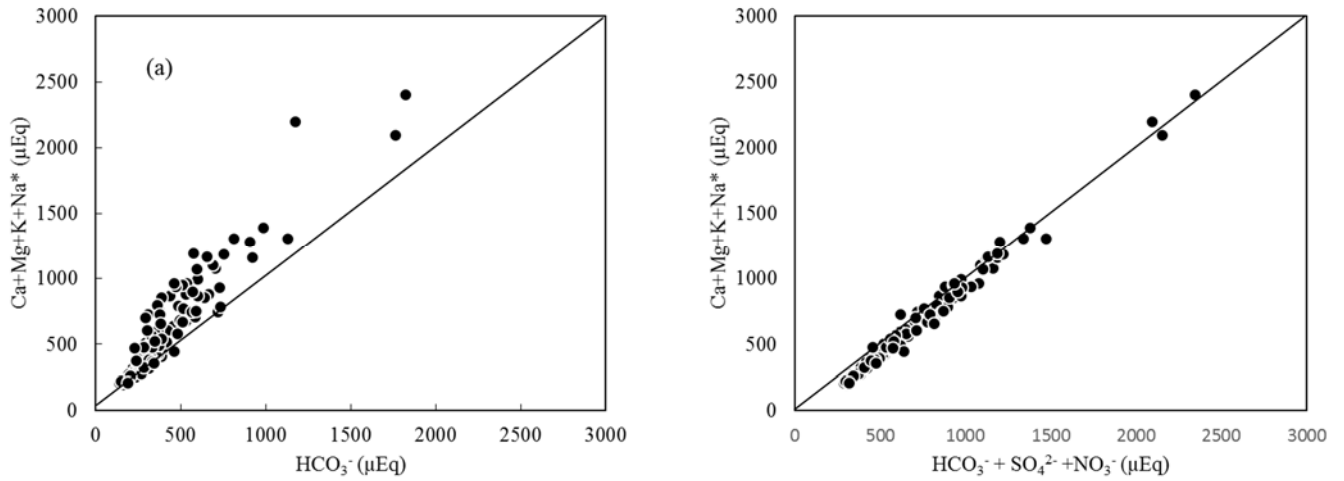

Fig. 6. Plots of total cations derived from carbonate and silicate weathering vs.  $\text{HCO}_3^-$  (a) and  $\text{HCO}_3^- + \text{SO}_4^{2-} + \text{NO}_3^-$  (b) for river waters in the SECRB.

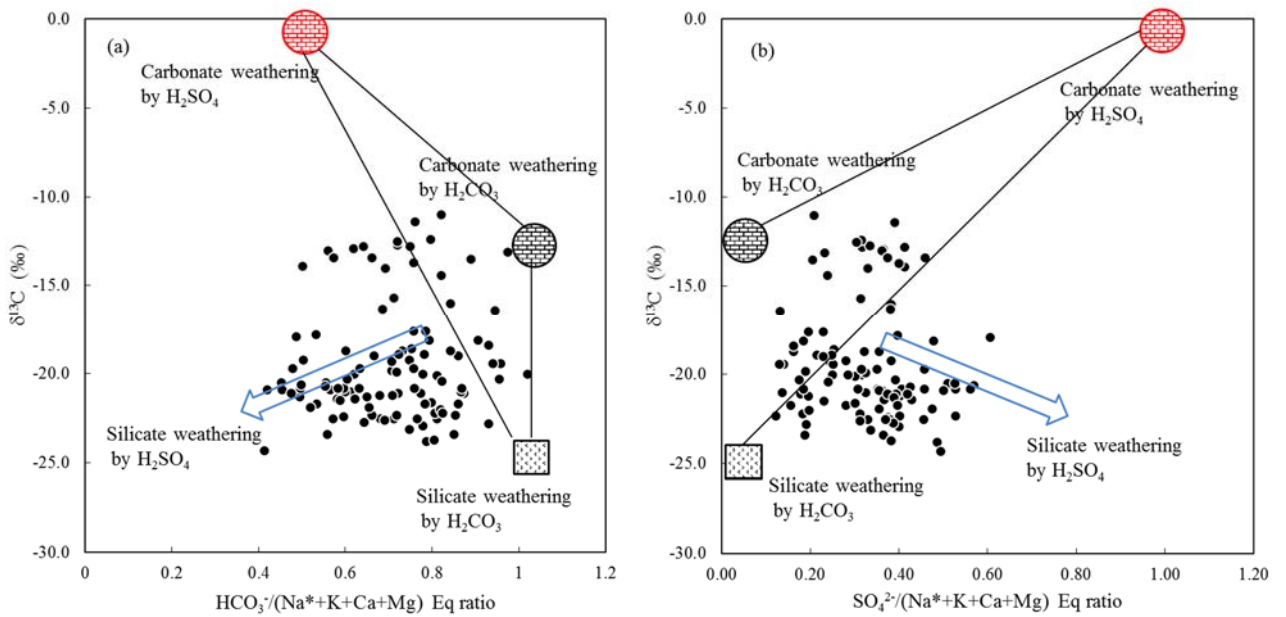

Fig. 7.  $\delta^{13}\text{C}_{\text{DIC}}$  vs.  $\text{HCO}_3^-/(\text{Na}^+ + \text{K}^+ + \text{Ca}^{2+} + \text{Mg}^{2+})$  (a) and  $\text{SO}_4^{2-}/(\text{Na}^+ + \text{K}^+ + \text{Ca}^{2+} + \text{Mg}^{2+})$  equivalent ratio (b) in river waters draining the SECRB. The plot show that most waters deviate from the three endmember mixing area (carbonate weathering by carbonic acid and sulfuric acid and silicate weathering by carbonic acid), illustrating the effect of sulfuric acid on silicate weathering.
