# Supplementary material for: Geochemistry of the dissolved loads of rivers in Southeast Coastal Region, China: Anthropogenic impact on chemical weathering and carbon sequestration
Source: Copernicus journal article supplement (doi:10.5194/bg-2018-109), 2018-03-20
Supplement: Supplementary file [file bg-2018-109-AC5-supplement.pdf]

1 **Geochemistry of the dissolved loads of rivers in Southeast Coastal Region, China:**

2 **Anthropogenic impact on chemical weathering and carbon sequestration**

3 Wenjing Liu<sup>1,2,3,4</sup>, Zhifang Xu<sup>1,2,3,4\*</sup>, Huiguo Sun<sup>1,2,3,4</sup>, Tong Zhao<sup>1,2,3,4</sup>, Chao Shi<sup>1,4</sup>, Taoze Liu<sup>5</sup>

4 <sup>1</sup> Key Laboratory of Cenozoic Geology and Environment, Institute of Geology and  
5 Geophysics, Chinese Academy of Sciences, Beijing 100029, China

6 <sup>2</sup> CAS Center for Excellence in Life and Paleoenvironment, Beijing, 100044, China

7 <sup>3</sup> Institutions of Earth Science, Chinese Academy of Sciences, Beijing 100029, China

8 <sup>4</sup> University of Chinese Academy of Sciences, Beijing 100049, China

9 <sup>5</sup> State Key Laboratory of Environmental Geochemistry, Institute of Geochemistry, Chinese  
10 Academy of Sciences, Guiyang, Guizhou 550002, China

11 \* Corresponding author. zfxu@mail.iggcas.ac.cn (Zhifang Xu, Tel: +86 10 82998289)

12 **Abstract:**

13 Southeast coastal region is one of the most developed and populated area in  
14 China. Meanwhile, it has been a severe acid rain impacted region for many years. The  
15 chemical compositions and carbon isotope ratio of dissolved inorganic carbon  
16 ( $\delta^{13}\text{C}_{\text{DIC}}$ ) of river waters were investigated to evaluate the chemical weathering and  
17 associated atmospheric  $\text{CO}_2$  consumption rates. Mass balance calculation indicated  
18 that the dissolved loads of major rivers in the Southeast Coastal Rivers Basin  
19 (SECRB) were contributed by atmospheric (14.3%, 6.6-23.4%), anthropogenic  
20 (15.7%, 0-41.1%), silicate weathering (39.5%, 17.8-74.0%) and carbonate weathering  
21 inputs (30.6%, 3.9-62.0%). The silicate and carbonate chemical weathering rates for  
22 these river watersheds were  $14.2\text{-}35.8 \text{ t km}^{-2} \text{ a}^{-1}$  and  $1.8\text{-}52.1 \text{ t km}^{-2} \text{ a}^{-1}$ , respectively.  
23 The associated mean  $\text{CO}_2$  consumption rate by silicate weathering for the whole  
24 SECRB were  $191 \times 10^3 \text{ mol km}^{-2} \text{ a}^{-1}$ . The chemical and  $\delta^{13}\text{C}_{\text{DIC}}$  evidences indicated  
25 that sulfuric and nitric acid (mainly from acid deposition) was significantly involved  
26 in chemical weathering of rocks. The calculation showed an overestimation of  $\text{CO}_2$   
27 consumption at  $0.19 \times 10^{12} \text{ g C a}^{-1}$  if sulfuric and nitric acid was ignored, which  
28 accounted for about 33.6% of the total  $\text{CO}_2$  consumption by silicate weathering in the  
29 SECRB. This study quantitatively highlights that the role of acid deposition in  
30 chemical weathering, suggesting that anthropogenic impact should be seriously  
31 considered in estimation of chemical weathering and associated  $\text{CO}_2$  consumption.

32 **Keywords:** Southeast Coastal Rivers Basin; Chemical weathering;  $\text{CO}_2$  consumption;  
33 acid deposition;

## 34 **1. Introduction**

35       Chemical weathering of rocks is a key process that links geochemical cycling of  
36 solid earth to the atmosphere and ocean. It provides nutrients to terrestrial and marine  
37 ecosystems and regulates the level of atmospheric CO<sub>2</sub>. As a net sink of atmospheric  
38 CO<sub>2</sub> on geologic timescales, estimation of silicate chemical weathering rates and the  
39 controlling factors are important issues related to long-term global climate change  
40 (e.g. Raymo and Ruddiman, 1992; Négrel et al. 1993; Berner and Caldeira, 1997;  
41 Gaillardet et al., 1999; Kump et al., 2000; Amiotte-Suchet et al., 2003; Oliva et al.,  
42 2003; Hartmann et al., 2009; Moon et al., 2014). As an important component in the  
43 Earth's Critical Zone (U.S. Nat. Res. Council Comm., 2001), river serves as an  
44 integrator of various natural and anthropogenic processes and products in a basin, and  
45 a carrier transporting the weathering products from continent to ocean. Therefore, the  
46 chemical compositions of river are widely used to evaluate chemical weathering and  
47 associated CO<sub>2</sub> consumption rates at catchment and/or continental scale, and examine  
48 their controlling factors (e.g., Edmond et al., 1995; Gislason et al., 1996; Galy and  
49 France-Lanord, 1999; Huh, 2003; Millot et al., 2002, 2003; Oliva et al., 2003; West et  
50 al., 2005; Moon et al., 2007; Noh et al., 2009; Shin et al., 2011; Calmels et al., 2011;  
51 Li, S., et al. 2014).

52       With the intensification of human activities, human perturbations to river basins  
53 have increased in frequency and magnitude (Raymond et al., 2008; Regnier et al.,  
54 2013; Li and Bush, 2015). It is important to understand how such perturbations  
55 function on the current weathering systems and to predict how they will affect the

56 Critical Zone of the future (Brantley and Lebedeva, 2011). In addition to CO<sub>2</sub>, other  
57 sources of acidity (such as sulfuric, nitric and organic acids) can also produce protons.  
58 These protons react with carbonate and silicate minerals, thus enhance rock chemical  
59 weathering rate and flux compared with only considering protons deriving from CO<sub>2</sub>  
60 dissolution (Calmels et al., 2007; Xu and Liu, 2010). The effect of other sourced  
61 proton (especially H<sup>+</sup> induced by SO<sub>2</sub> and NO<sub>x</sub> coming from anthropogenic activities)  
62 on chemical weathering is documented to be an important mechanism modifying  
63 atmospheric CO<sub>2</sub> consumption by rock weathering (Galy and France-Lanord, 1999;  
64 Semhi, et al., 2000; Spence and Telmer, 2005; Xu and Liu, 2007; Perrin et al., 2008;  
65 Gandois et al., 2011). Anthropogenic emissions of SO<sub>2</sub> was projected to provide 3 to 5  
66 times greater H<sub>2</sub>SO<sub>4</sub> to the continental surface than the pyrite oxidation originated  
67 H<sub>2</sub>SO<sub>4</sub> (Lerman et al., 2007). Therefore, increasing acid precipitation due to intense  
68 human activities nowadays could make this mechanism more prominently.

69 The role of acid precipitation on the chemical weathering and CO<sub>2</sub> consumption  
70 has been investigated in some river catchments (Amiotte-Suchet et al., 1995; Probst et  
71 al., 2000; Vries et al., 2003; Lerman et al., 2007; Xu and Liu, 2010). It has been  
72 documented that silicate rocks were more easily disturbed by acid precipitation during  
73 their weathering and soil leaching processes, because of their low buffering capacity  
74 (Reuss et al., 1987; Amiotte-Suchet et al., 1995). The disturbance could be intensive  
75 and cause a decrease of CO<sub>2</sub> consumption about 73% by weathering due to acid  
76 precipitation in the Strengbach catchment (Vosges Mountains, France), where is  
77 dominated by crystalline rocks (Amiotte-Suchet et al., 1995). This highlights the

78 importance of exploring anthropogenic impact on chemical weathering and CO<sub>2</sub>  
79 consumption under different background (e.g. lithology, climate, human activity  
80 intensity, and basin scale) for better constraining and estimation of acid precipitation  
81 effect on rock weathering. Asia, especially East Asia, is one of the world's major  
82 sulfur and nitrogen emissions areas. However, the effect of acid precipitation on  
83 silicate weathering and associated CO<sub>2</sub> consumption was not well evaluated in this  
84 area, especially lack of quantitative studies.

85         Acid precipitation affected about 30% of the territory of China (Fig. 1), and the  
86 seriously areas are mainly located in the east, the south and the center of China, where  
87 over 70% of cities were suffering from acid rain (Zhang et al., 2007a; State  
88 Environmental Protection Administration of China, 2009). Southeast coastal region of  
89 China is one of the most developed and populated areas of this country, dominated by  
90 Mesozoic magmatic rocks (mainly granite and volcanic rocks) in lithology.  
91 Meanwhile, the southeast coastal area has become one of the three major acid rain  
92 areas in China since the beginning of the 1990s (Larssen et al., 1999). It is seriously  
93 impacted by acid rain, with a volume-weighted mean value of pH lower than 4.5 for  
94 many years (Wang et al., 2000; Larssen and Carmichael, 2000; Zhao, 2004; Han et al.,  
95 2006; Larssen et al., 2006; Zhang et al., 2007a; Huang et al., 2008; Xu et al., 2011).  
96 Therefore, it is an ideal area for evaluating silicate weathering and the effect of acid  
97 rain. In the previous work, we have recognized and discussed the importance of  
98 sulfuric acid on the rock weathering and associated CO<sub>2</sub> consumption in the Qiantang  
99 river basin in this area (Liu et al., 2016). However, it is difficult to infer the

100 anthropogenic impact on chemical weathering and CO<sub>2</sub> consumption in the whole  
101 southeast coastal area from the case study of the single river basin, because of the  
102 variations on lithology, basin scale, runoff and anthropogenic background in the large  
103 acid deposition affected area. In this study, the chemical and carbon isotope  
104 composition of rivers in this area were first systematically investigated, in order to: (i)  
105 decipher the different sources of solutes and to quantify their contributions to the  
106 dissolved loads; (ii) calculate silicate weathering and associated CO<sub>2</sub> consumption  
107 rates; (iii) evaluate the effects of acid deposition on rock weathering and CO<sub>2</sub>  
108 consumption flux in the whole southeast coastal rivers basin.

## 109 **2. Natural setting of study area**

110 Southeast coastal region of China, where the landscape is dominated by  
111 mountainous and hilly terrain, lacks the conditions for developing large rivers. The  
112 rivers in this region are dominantly small and medium-sized due to the topographic  
113 limitation. Only 5 rivers in this region have length over 200 km and the drainage area  
114 over 10,000 km<sup>2</sup>, and they are in turn from north to south: the Qiantangjiang  
115 (Qiantang) and the Oujiang (Ou) in Zhejiang province, the Minjiang (Min) and the  
116 Jiulongjiang (Jiulong) in Fujian province and the Hanjiang (Han) in Guangdong  
117 province (Fig. 1). Rivers in this region generally flow eastward or southward and  
118 finally inject into the East China Sea or the South China Sea (Fig. 1), and they are  
119 collectively named as ‘Southeast Coastal Rivers’ (SECRs).

120 The Southeast Coastal Rivers Basin (SECRB) belongs to the warm and humid  
121 subtropical oceanic monsoon climate. The mean annual temperature and precipitation

122 are 17-21°C and 1400-2000 mm, respectively. The precipitation mainly happens  
123 during May to September, and the minimum and maximum temperature often occurs  
124 in January and July. This area is one of the most developed areas in China, with a  
125 population more than 190 million (mean density of ~470 individuals/km<sup>2</sup>), but the  
126 population mainly concentrated in the coastal urban areas. The vegetation coverage of  
127 these river basins is more than 60%, mainly subtropical evergreen-deciduous  
128 broadleaf forest and mostly distributing in mountains area. Cultivated land, and  
129 industries and cities are mainly located in the plain areas and lower reach of these  
130 rivers.

131 Geologically, three regional-scale fault zones are distributed across the SECRB  
132 region (Fig. 1). They are the sub-EW-trending Shaoxing-Jiangshan fault zone, the  
133 NE-trending Zhenghe-Dapu fault zone, and the NE-trending Changle-Nanao fault  
134 zone (Shu et al., 2009). These fault zones dominate the direction of the mountains  
135 ridgelines and drainages, as well as the formation of the basins and bay. The Zhenghe-  
136 Dapu fault zone is a boundary line of Caledonian uplift belt and Hercynian-Indosinian  
137 depression zone. Mesozoic magmatic rocks are widespread in the southeast coastal  
138 region with a total outcrop area at about 240,000 km<sup>2</sup>. Over 90% of the Mesozoic  
139 magmatic rocks are granitoids (granites and rhyolites) and their volcanic counterpart  
140 with minor existence of basalts (Zhou et al., 2000, 2006; Bai et al., 2014). These crust-  
141 derived granitic rocks are mainly formed in the Yanshanian stage, and may have been  
142 related to multiple collision events between Cathaysia and Yangtze blocks and Pacific  
143 plate (Zhou and Li, 2000; Xu et al., 2016). Among the major river basins, the

144 proportions of magmatic rocks outcrop are about 36% in the Qiantang catchment,  
145 over 80% in the Ou, the Jiaoxi and the Jin catchments, and around 60% in the Min,  
146 the Jiulong, the Han and the Rong catchments (Shi, 2014). The overlying Quaternary  
147 sediment in this area is composed of brown-yellow siltstones but is rarely developed.  
148 The oldest basement complex is composed of metamorphic rocks of greenschist and  
149 amphibolite facies. Sedimentary rocks categories into two types, one is mainly  
150 composed by red clastic rocks which cover more than 40,000 km<sup>2</sup> in the area; the  
151 other occurs as interlayers within volcanic formations, including varicolored  
152 mudstones and sandstones. They are mainly distributed on the west of Zhenghe-Dapu  
153 fault zone (FJBGRM, 1985; ZJBGMR, 1989; Shu et al., 2009).

### 154 **3. Sampling and analytical method**

155 A total of 121 water samples were collected from mainstream and tributaries of  
156 the major rivers in the SECRB from July 8th to 31 of 2010 in the high-flow period  
157 (sample number and locations are shown in Fig. 1). 2-L water samples were collected  
158 in the middle channel of the river from bridges or ferries, or directly from the center  
159 of some shallow streams in the source area. The lower reaches sampling sites were  
160 selected distant away from the estuary to avoid the influence of seawater. Temperature  
161 (T), pH and electrical conductivity (EC) were measured in the field with a portable  
162 EC/pH meter (YSI-6920, USA). All of the water samples for chemical analysis were  
163 filtered in field through 0.22 μm Millipore membrane filter, and the first portion of the  
164 filtration was discarded to wash the membrane and filter. One portion filtrate were  
165 stored directly in HDPE bottles for anion analysis and another were acidified to pH <



166 2 with 6 M double sub-boiling distilled HNO<sub>3</sub> for cation analysis. All containers were  
167 previously washed with high-purity HCl and rinsed with Milli-Q 18.2 MΩ water.

168 HCO<sub>3</sub><sup>-</sup> was titrated with 0.005M HCl within 12 h after sampling. Cations (Na<sup>+</sup>,  
169 K<sup>+</sup>, Ca<sup>2+</sup> and Mg<sup>2+</sup>) were determined using Inductively Coupled Plasma Atomic  
170 Emission Spectrometer (ICP-AES) (IRIS Intrepid II XSP, USA). Anions (Cl<sup>-</sup>, F<sup>-</sup>,  
171 NO<sub>3</sub><sup>-</sup> and SO<sub>4</sub><sup>2-</sup>) were analyzed by ionic chromatography (IC) (Dionex Corporation,  
172 USA). Dissolved silica was determined by spectrophotometry using the molybdate  
173 blue method. Reagent and procedural blanks were measured in parallel to the sample  
174 treatment, and calibration curve was evaluated by quality control standards before,  
175 during and after the analyses of each batch of samples. Measurement reproducibility  
176 was determined by duplicated sample and standards, which showed ±3% precision for  
177 the cations and ±5% for the anions.

178 River water samples for carbon isotopic ratio (δ<sup>13</sup>C) of dissolved inorganic  
179 carbon (DIC) measurements were collected in 150 ml glass bottles with air-tight caps  
180 and preserved with HgCl<sub>2</sub> to prevent biological activity. The samples were kept  
181 refrigerated until analysis. For the δ<sup>13</sup>C measurements, the filtered samples were  
182 injected into glass bottles with phosphoric acid. The CO<sub>2</sub> was then extracted and  
183 cryogenically purified using a high vacuum line. δ<sup>13</sup>C isotopic ratios were analyzed on  
184 Finnigen MAT-252 stable isotope mass spectrometer at the State Key Laboratory of  
185 Environmental Geochemistry, Chinese Academy of Sciences. The results are  
186 expressed with reference to VPDB, as follows:

187 
$$\delta^{13}\text{C} = [((^{13}\text{C}/^{12}\text{C})_{\text{sample}} / (^{13}\text{C}/^{12}\text{C})_{\text{standard}}) - 1] \times 1000 \quad (1)$$

188 The  $\delta^{13}\text{C}$  measurement has an overall precision of 0.1%. A number of duplicate  
189 samples were measured and the results show that the differences were less than the  
190 range of measurement accuracy.

#### 191 **4. Results**

192 The major parameter and ion concentrations of samples are given in Table 1. The  
193 pH values of water samples ranged from 6.50 to 8.24, with an average of 7.23. Total  
194 dissolved solids (TDS) of water samples varied from 35.3 to 205 mg l<sup>-1</sup>, with an  
195 average of 75.2 mg l<sup>-1</sup>. Compared with the major rivers in China, the average TDS  
196 was significantly lower than the Changjiang (224 mg l<sup>-1</sup>, Chetelat et al., 2008), the  
197 Huanghe (557 mg l<sup>-1</sup>, Fan et al., 2014) and the Zhujiang (190 mg l<sup>-1</sup>, Zhang et al.,  
198 2007b). However, the average TDS was comparable to the rivers draining silicate rock  
199 dominated areas, e.g. the upper Ganjiang in Ganzhou, south China (63 mg l<sup>-1</sup>, Ji and  
200 Jiang, 2012), the Amur in north China (70 mg l<sup>-1</sup>, Moon et al., 2009), the Xishui in  
201 Hubei, central China (101 mg l<sup>-1</sup>, Wu et al., 2013), and north Han river in South Korea  
202 (75.5 mg l<sup>-1</sup>, Ryu et al., 2008). Among the major rivers in the SECRB, the Qiantang  
203 had the highest TDS value (averaging at 121 mg l<sup>-1</sup>), and the Ou had the lowest TDS  
204 value (averaging at 48.8 mg l<sup>-1</sup>).

205 Major ion compositions are shown in the cation and anion ternary diagrams (Fig.  
206 2a and b). In comparison with rivers (e.g. the Wujiang and Xijiang) draining  
207 carbonate rocks dominated area (Han and Liu, 2004; Xu and Liu, 2010), these rivers  
208 in the SECRB had distinctly higher proportions of Na<sup>+</sup>, K<sup>+</sup>, and dissolved SiO<sub>2</sub>. As  
209 shown in the Fig. 2, most samples had high Na<sup>+</sup> and K<sup>+</sup> proportions, with an average

210 more than 50% (in  $\mu\text{mol l}^{-1}$ ) of the total cations, except for samples from the  
211 Qiantang. The concentrations of  $\text{Na}^+$  and  $\text{K}^+$  ranged from 43.5 to 555  $\mu\text{mol l}^{-1}$  and  
212 42.9 to 233  $\mu\text{mol l}^{-1}$ , with average values of 152 and 98  $\mu\text{mol l}^{-1}$ , respectively. The  
213 concentrations of dissolved  $\text{SiO}_2$  ranged from 98.5 to 370  $\mu\text{mol l}^{-1}$ , with an average of  
214 212  $\mu\text{mol l}^{-1}$ .  $\text{Ca}^{2+}$  and  $\text{Mg}^{2+}$  accounted for about 38% and 11.6% of the total cation  
215 concentrations.  $\text{HCO}_3^-$  was the dominant anion with concentrations ranging from 139  
216 to 1822  $\mu\text{mol l}^{-1}$ . On average, it comprised 60.6% (36-84.6%) of total anions on a  
217 molar basis, followed by  $\text{SO}_4^{2-}$  (14.6%),  $\text{Cl}^-$  (13.1%) and  $\text{NO}_3^-$  (11.8%). The major  
218 ionic compositions indicate that water chemistry of these rivers in the SECRB is  
219 controlled by silicate weathering. Meanwhile, it is also influenced by carbonate  
220 weathering, especially in the Qiantang catchment.

221 The  $\delta^{13}\text{C}$  of dissolved inorganic carbon in the rivers of the SECRB are also given  
222 in Table 1. The  $\delta^{13}\text{C}$  of the water samples showed a wide range, from -11.0‰ to -  
223 24.3‰ (average -19.4‰), and with a majority of samples falling between -15 and -  
224 23‰. The values are similar to rivers draining Deccan Traps (Das et al., 2005).

## 225 **5. Discussion**

226 The dissolved solids in river water are commonly from atmospheric and  
227 anthropogenic inputs and weathering of rocks within the drainage basin. It is  
228 necessary to quantify the contribution of different sources to the dissolved loads  
229 before deriving chemical weathering rates and associated  $\text{CO}_2$  consumption.

### 230 *5.1 Atmospheric and anthropogenic inputs*

231 To evaluate atmospheric inputs to river waters, chloride is the most common

232 used reference. Generally, water samples that have the lowest  $\text{Cl}^-$  concentrations are  
233 employed to correct the proportion of atmospheric inputs in a river system (Négrel et  
234 al., 1993; Gaillardet et al., 1997; Viers et al., 2001; Xu and Liu, 2007). In pristine  
235 areas, the concentration of  $\text{Cl}^-$  in river water is assumed to be entirely derived from  
236 the atmosphere, provided that the contribution of evaporites is negligible (e.g. Stallard  
237 and Edmond, 1981; Négrel et al., 1993). In the SECRB, the lowest  $\text{Cl}^-$  concentration  
238 was mainly found in the headwater of each river. According to the geologic setting, no  
239 salt-bearing rocks was found in these headwater area (FJBGRM, 1985; ZJBGMR,  
240 1989). In addition, these areas are mainly mountainous and sparsely populated.  
241 Therefore, we assumed that the lowest  $\text{Cl}^-$  concentration of samples from the  
242 headwater of each major river came entirely from atmosphere.

243 The proportion of atmosphere-derived ions in the river waters can then be  
244 calculated by using the element/ $\text{Cl}$  ratios of the rain. Chemical compositions of rain in  
245 the studied area have been reported at different sites, including Hangzhou, Jinhua,  
246 Nanping, Fuzhou and Xiamen (Zhao, 2004; Zhang et al., 2007a; Huang et al., 2008;  
247 Cheng et al., 2011; Xu et al., 2011) (Fig. 1). The volume-weighted mean  
248 concentration of ions and  $\text{Cl}$ -normalized molar ratios are compiled in Table 2.  
249 According to this procedure, 6.6-23.4% (averaging 14.3%) of total dissolved cations  
250 in the major rivers of the SECRB originated from rain. Among the anions,  $\text{SO}_4^{2-}$  and  
251  $\text{NO}_3^-$  in the rivers are mainly from the atmospheric input, averaging at 73.2% for  
252  $\text{SO}_4^{2-}$  and 75.8% for  $\text{NO}_3^-$ , respectively.

253 As one of the most developed and populated areas in China, the chemistry of

254 river waters in the SECRB could be significantly impacted by anthropogenic inputs.  
255  $\text{Cl}^-$ ,  $\text{NO}_3^-$  and  $\text{SO}_4^{2-}$  are commonly associated with anthropogenic sources and have  
256 been used as tracers of anthropogenic inputs in watershed. High concentrations of  $\text{Cl}^-$ ,  
257  $\text{NO}_3^-$  and  $\text{SO}_4^{2-}$  can be found at the lower reaches of rivers in the SECRB, and an  
258 obvious increase after flowing through plain areas and cities. This tendency indicates  
259 that river water chemistry is affected by anthropogenic inputs while passing through  
260 the catchments. After correcting for the atmospheric contribution to river waters, the  
261 following assumption is needed to quantitatively estimate the contributions of  
262 anthropogenic inputs. That is,  $\text{Cl}^-$  originates from only atmospheric and anthropogenic  
263 inputs, the excess of atmospheric  $\text{Cl}^-$  is regarded to present anthropogenic inputs and  
264 balanced by  $\text{Na}^+$ .

## 265 *5.2 Chemical weathering inputs*

266 Water samples were displayed on a plot of Na-normalized molar ratios (Fig. 3).  
267 The values of the world's large rivers (Gaillardet et al. 1999) are also shown in the  
268 figure. A best correlations between elemental ratios were observed for  $\text{Ca}^{2+}/\text{Na}^+$  vs.  
269  $\text{Mg}^{2+}/\text{Na}^+$  ( $R^2 = 0.95$ ,  $n = 120$ ) and  $\text{Ca}^{2+}/\text{Na}^+$  vs.  $\text{HCO}_3^-/\text{Na}^+$  ( $R^2 = 0.98$ ,  $n = 120$ ). The  
270 samples cluster on a mixing line mainly between silicate and carbonate end-members,  
271 closer to the silicate end-member, and with little evaporite contribution. This  
272 corresponds with the distribution of rock types in the SECRB. In addition, all water  
273 samples have equivalent ratios of  $(\text{Na}^+ + \text{K}^+)/\text{Cl}^-$  larger than one, indicating silicate  
274 weathering as the source of  $\text{Na}^+$  and  $\text{K}^+$  rather than chloride evaporites dissolution.

275 The geochemical characteristics of the silicate and carbonate end-members can

276 be deduced from the correlations between elemental ratios and referred to literature  
277 data for catchments with well-constrained lithology. After correction for atmospheric  
278 inputs, the  $\text{Ca}^{2+}/\text{Na}^+$ ,  $\text{Mg}^{2+}/\text{Na}^+$  and  $\text{HCO}_3^-/\text{Na}^+$  of the river samples ranged from 0.31  
279 to 30, 0.16 to 6.7, and 1.1 to 64.2, respectively. According to the geological setting  
280 (Fig. 1), there are some small rivers draining purely silicate areas in the SECRs  
281 drainage basins. Based on the elemental ratios of these rivers, we assigned the silicate  
282 end-member for this study as  $\text{Ca}^{2+}/\text{Na}^+=0.41\pm0.10$ ,  $\text{Mg}^{2+}/\text{Na}^+=0.20\pm0.03$  and  $\text{HCO}_3^-$   
283  $/\text{Na}^+=1.7\pm0.6$ . The ratio of  $(\text{Ca}^{2+}+\text{Mg}^{2+})/\text{Na}^+$  for silicate end-member was  $0.61\pm0.13$ ,  
284 which is close to the silicate end-member of world rivers ( $(\text{Ca}^{2+}+\text{Mg}^{2+})/\text{Na}^+ =$   
285  $0.59\pm0.17$ , Gaillardet et al., 1999). Moreover, previous researches have documented  
286 the chemical composition of rivers, such as the Amur and the Songhuajiang in North  
287 China, the Xishui in the lower reaches of the Changjiang, and major rivers in South  
288 Korea (Moon et al., 2009; Liu et al., 2013; Wu et al., 2013; Ryu et al., 2008; Shin et  
289 al., 2011). These river basins has similar lithological setting with the study area, we  
290 could further validate the composition of silicate end-member with their results.  
291  $\text{Ca}^{2+}/\text{Na}^+$  and  $\text{Mg}^{2+}/\text{Na}^+$  ratios of silicate end-member were reported for the Amur  
292 (0.36 and 0.22), the Songhuajiang ( $0.44\pm0.23$  and 0.16), the Xishui ( $0.6\pm0.4$  and  
293  $0.32\pm0.18$ ), the Han (0.55 and 0.21) and six major rivers in South Korea (0.48 and  
294 0.20) in the studies above, well bracketing our estimation for silicate end-member.

295       Whereas, some samples show high concentrations of  $\text{Ca}^{2+}$ ,  $\text{Mg}^{2+}$  and  $\text{HCO}_3^-$ ,  
296 indicating the contribution of carbonate weathering. The samples collected in the  
297 upper reaches (Sample 12 and 13) of the Qiantang fall close to the carbonate end-

298 member documented for world's large rivers (Gaillardet et al., 1999). In the present  
299 study,  $\text{Ca}^{2+}/\text{Na}^+$  ratio of  $0.41\pm 0.10$  and  $\text{Mg}^{2+}/\text{Na}^+$  ratio of  $0.20\pm 0.03$  for silicate end-  
300 member are used to calculate the contribution of  $\text{Ca}^{2+}$  and  $\text{Mg}^{2+}$  from silicate  
301 weathering. Finally, residual  $\text{Ca}^{2+}$  and  $\text{Mg}^{2+}$  are apportioned to carbonate weathering.

### 302 *5.3 Chemical weathering rate in the SECRBs*

303 Based on the above assumption, a forward model is employed to quantify the  
304 relative contribution of the different sources to the rivers of the SECRB in this study.  
305 (e.g. Galy and France-Lanord, 1999; Moon et al., 2007; Xu and Liu, 2007; 2010; Liu  
306 et al., 2013). The calculated contributions of different reservoir to the total cationic  
307 loads for major rivers and their main tributaries in the SECRB are presented in Fig. 4.  
308 On average, the dissolved cationic loads of the rivers in the study area originate  
309 dominantly from silicate weathering, which accounts for 39.5% (17.8-74.0%) of the  
310 total cationic loads in molar unit. Carbonate weathering and anthropogenic inputs  
311 account for 30.6% (3.9-62.0%) and 15.7% (0-41.1%), respectively. Contributions  
312 from silicate weathering are high in the Ou (55.6%), the Huotong (54.5%), the Ao  
313 (48.3%) and the Min (48.3%) river catchments, which dominated by granitic and  
314 volcanic bedrocks. In contrast, high contribution from carbonate weathering is  
315 observed in the Qiantang (54.0%), the Jin (52.2%) and the Jiulong (44.8%) river  
316 catchments. The results manifest the lithology control on river solutes of drainage  
317 basin.

318 The chemical weathering rate of rocks is estimated by the mass budget, basin  
319 area and annual discharge (data from the Annual Hydrological Report P. R. China,

320 2010, Table 3), expressed in  $\text{ton km}^{-2} \text{ a}^{-1}$ . The silicate weathering rate (SWR) is  
321 calculated using major cationic concentrations from silicate weathering and assuming  
322 that all dissolved  $\text{SiO}_2$  is derived from silicate weathering (Xu and Liu, 2010), as the  
323 equation below:

$$324 \quad \text{SWR} = ([\text{Na}]_{\text{sil}} + [\text{K}]_{\text{sil}} + [\text{Ca}]_{\text{sil}} + [\text{Mg}]_{\text{sil}} + [\text{SiO}_2]_{\text{riv}}) \times \text{discharge/area} \quad (2)$$

325 The assumption about Si could lead to overestimation of the silicate weathering  
326 rate, as part of silica may come from dissolution of biogenic sources rather than the  
327 weathering of silicate minerals (Millot et al., 2003; Shin et al., 2011). Thus, the  
328 cationic silicate weathering rates ( $\text{Cat}_{\text{sil}}$ ) were also calculated.

329 The carbonate weathering rate (CWR) is calculated based on the sum of  $\text{Ca}^{2+}$ ,  
330  $\text{Mg}^{2+}$  and  $\text{HCO}_3^-$  from carbonate weathering, with half of the  $\text{HCO}_3^-$  coming from  
331 carbonate weathering being derived from the atmosphere  $\text{CO}_2$ , as the equation below:

$$332 \quad \text{CWR} = ([\text{Ca}]_{\text{carb}} + [\text{Mg}]_{\text{carb}} + 1/2[\text{HCO}_3]_{\text{carb}}) \times \text{discharge/area} \quad (3)$$

333 The chemical weathering rate and flux are calculated for major rivers and their  
334 main tributaries in the SECRB, and the results are shown in Table 3. Silicate and  
335 carbonate weathering fluxes of these rivers (SWF and CWF) range from  $0.02 \times 10^6 \text{ t a}^{-1}$   
336  $^1$  to  $1.80 \times 10^6 \text{ t a}^{-1}$ , and from  $0.004 \times 10^6 \text{ t a}^{-1}$  to  $1.74 \times 10^6 \text{ t a}^{-1}$ , respectively. Among the  
337 rivers, the Min has the highest silicate weathering flux, and the Qiantang has the  
338 highest carbonate weathering flux. On the whole SECRB scale,  $3.95 \times 10^6 \text{ t a}^{-1}$  and  
339  $4.09 \times 10^6 \text{ t a}^{-1}$  of dissolved solids originating from silicate and carbonate weathering,  
340 respectively, are transported into the East and South China Sea by rivers in this  
341 region. Compared with the largest three river basins (the Changjiang, the Huanghe



342 and the Xijiang) in China, the flux of silicate weathering calculated for the SECRB is  
343 lower than the Changjiang ( $9.5 \times 10^6 \text{ t a}^{-1}$ , Gaillardet et al. 1999), but higher than the  
344 Huanghe ( $1.52 \times 10^6 \text{ t a}^{-1}$ , Fan et al., 2014) and the Xijiang ( $2.62 \times 10^6 \text{ t a}^{-1}$ , Xu and Liu,  
345 2010).

346 The silicate and carbonate chemical weathering rates for these river watersheds  
347 were  $14.2\text{-}35.8 \text{ t km}^{-2} \text{ a}^{-1}$  and  $1.8\text{-}52.1 \text{ t km}^{-2} \text{ a}^{-1}$ , respectively. The total rock  
348 weathering rate (TWR) for the whole SECRB is  $48.1 \text{ ton km}^{-2} \text{ a}^{-1}$ , higher than the  
349 world average ( $24 \text{ ton km}^{-2} \text{ a}^{-1}$ , Gaillardet et al., 1999). The cationic silicate  
350 weathering rates ( $\text{Cat}_{\text{sil}}$ ) ranges from  $4.7$  to  $12.0 \text{ ton km}^{-2} \text{ a}^{-1}$  for the river watersheds  
351 in the SECRB, averaging at  $7.8 \text{ ton km}^{-2} \text{ a}^{-1}$ . Furthermore, a good linear correlation  
352 ( $R^2 = 0.77$ ,  $n = 28$ ) is observed between the  $\text{Cat}_{\text{sil}}$  and runoff (Fig. 5), indicating  
353 silicate weathering rates is controlled by the runoff as documented in previous  
354 researches (e.g., Bluth and Kump, 1994; Gaillardet et al., 1999; Millot et al., 2002;  
355 Oliva et al., 2003; Wu et al., 2013; Pepin et al., 2013).

#### 356 *5.4 CO<sub>2</sub> consumption and the role of sulfuric acid*

357 To calculate atmospheric CO<sub>2</sub> consumption by silicate weathering (CSW) and by  
358 carbonate weathering (CCW), a charge-balanced state between rock chemical  
359 weathering-derived alkalinity and cations was assumed (Roy et al., 1999).

$$360 \quad [\text{CO}_2]_{\text{CSW}} = [\text{HCO}_3]_{\text{CSW}} = [\text{Na}]_{\text{sil}} + [\text{K}]_{\text{sil}} + 2[\text{Ca}]_{\text{sil}} + 2[\text{Mg}]_{\text{sil}} \quad (4)$$

$$361 \quad [\text{CO}_2]_{\text{CCW}} = [\text{HCO}_3]_{\text{CCW}} = [\text{Ca}]_{\text{carb}} + [\text{Mg}]_{\text{carb}} \quad (5)$$

362 The calculated CO<sub>2</sub> consumption rates by chemical weathering for the rivers in  
363 SECRB are shown in Table 3. CO<sub>2</sub> consumption rates by carbonate and silicate

364 weathering are from  $17.9$  to  $530 \times 10^3 \text{ mol km}^{-2} \text{ a}^{-1}$  (averaging at  $206 \times 10^3 \text{ mol km}^{-2} \text{ a}^{-1}$ )  
365 and from  $167$  to  $460 \times 10^3 \text{ mol km}^{-2} \text{ a}^{-1}$  (averaging at  $281 \times 10^3 \text{ mol km}^{-2} \text{ a}^{-1}$ ) for major  
366 river catchments in the SECRB. The  $\text{CO}_2$  consumption rates by silicate weathering in  
367 the SECRB are higher than that of major rivers in the world and China, such as the  
368 Amazon ( $174 \times 10^3 \text{ mol km}^{-2} \text{ a}^{-1}$ , Mortatti and Probst, 2003), the Mississippi and the  
369 Mackenzie ( $66.8$  and  $34.1 \times 10^3 \text{ mol km}^{-2} \text{ a}^{-1}$ , Gaillardet et al., 1999), the Changjiang  
370 ( $112 \times 10^3 \text{ mol km}^{-2} \text{ a}^{-1}$ , Chetelat et al., 2008), the Huanghe ( $35 \times 10^3 \text{ mol km}^{-2} \text{ a}^{-1}$ , Fan  
371 et al., 2014), the Xijiang ( $154 \times 10^3 \text{ mol km}^{-2} \text{ a}^{-1}$ , Xu and Liu, 2010), the  
372 Longchuanjiang ( $173 \times 10^3 \text{ mol km}^{-2} \text{ a}^{-1}$ , Li et al., 2011) and the Mekong ( $191 \times 10^3 \text{ mol}$   
373  $\text{km}^{-2} \text{ a}^{-1}$ , Li et al., 2014) and three large rivers in eastern Tibet ( $103\text{-}121 \times 10^3 \text{ mol km}^{-2}$   
374  $\text{a}^{-1}$ , Noh et al., 2009), the Hanjiang in central China ( $120 \times 10^3 \text{ mol km}^{-2} \text{ a}^{-1}$ , Li et al.,  
375 2009) and the Sonhuajiang in north China ( $66.6 \times 10^3 \text{ mol km}^{-2} \text{ a}^{-1}$ , Liu et al., 2013).  
376 The high  $\text{CO}_2$  consumption rates by silicate weathering in the SECRB could be  
377 attributed to extensive distribution of silicate rocks, high runoff, humid and hot  
378 climatic conditions. The regional fluxes of  $\text{CO}_2$  consumption by silicate and carbonate  
379 weathering is about  $47.9 \times 10^9 \text{ mol a}^{-1}$  ( $0.57 \times 10^{12} \text{ g C a}^{-1}$ ) and  $41.9 \times 10^9 \text{ mol a}^{-1}$   
380 ( $0.50 \times 10^{12} \text{ g C a}^{-1}$ ) in the whole SECRB.

381         However, in addition to  $\text{CO}_2$ , the anthropogenic sourced proton (e.g.  $\text{H}_2\text{SO}_4$  and  
382  $\text{HNO}_3$ ) is well documented as significant proton providers in rock weathering process  
383 (Galy and France-Lanord, 1999; Karim and Veizer, 2000; Yoshimura et al., 2001; Han  
384 and Liu, 2004; Spence and Telmer, 2005; Lerman and Wu, 2006; Xu and Liu 2007;  
385 2010; Perrin et al., 2008; Gandois et al., 2011). Sulfuric acid can be generated by

386 natural oxidation of pyrite and anthropogenic emissions of SO<sub>2</sub> from coal combustion  
387 and subsequently dissolve carbonate and silicate minerals. The riverine nitrate in a  
388 watershed can be derived from atmospheric deposition, synthetic fertilizers, microbial  
389 nitrification, sewage and manure, etc. (e.g. Kendall 1998). Although it is difficult to  
390 determine the sources of nitrate in river waters, we can at least simply assume that  
391 nitrate from acid deposition is one of the providers of protons. The consumption of  
392 CO<sub>2</sub> by rock weathering would be overestimated if H<sub>2</sub>SO<sub>4</sub> and HNO<sub>3</sub> induced rock  
393 weathering was ignored (Spence and Telmer, 2005; Xu and Liu, 2010; Shin et al.,  
394 2011; Gandois et al., 2011). Thus, the role of the anthropogenic sourced protons on  
395 the chemical weathering is crucial for an accurate estimation of CO<sub>2</sub> consumption by  
396 rock weathering.

397       Rapid economic growth and increased energy demand have result in severe air  
398 pollution problems in China, indicated by the high levels of mineral acids  
399 (predominately sulfuric) observed in precipitation (Lassen and Carmichael, 2000; Pan  
400 et al., 2013; Liu et al., 2016). The national SO<sub>2</sub> emissions in 2010 reached to 30.8  
401 Tg/year (Lu et al., 2011). Previous study documented that fossil fuel combustion  
402 accounts for the dominant sulfur deposition (~77%) in China (Liu et al., 2016). The  
403 wet deposition rate of nitrogen peaked over the central and south China, with mean  
404 value of 20.2, 18.2 and 25.8 kg N ha<sup>-1</sup> yr<sup>-1</sup> in Zhejiang, Fujian and Guangdong  
405 province, respectively (Lu and Tian, 2007). Current sulfur and nitrogen depositions in  
406 the Southeast coastal region are still among the highest in China (Fang et al., 2013;  
407 Cui et al., 2014; Liu et al., 2016).

408 The involvement of protons originating from  $\text{H}_2\text{SO}_4$  and  $\text{HNO}_3$  in the river  
409 waters can be verified by the stoichiometry between cations and anions, shown in Fig.  
410 6. In the rivers of the SECRB, the sum cations released by silicate and carbonate  
411 weathering were not balanced by  $\text{HCO}_3^-$  only (Fig. 6a), but were almost balanced by  
412 the sum of  $\text{HCO}_3^-$  and  $\text{SO}_4^{2-}$  and  $\text{NO}_3^-$  (Fig. 6b). This implies that  $\text{H}_2\text{CO}_3$  and  $\text{H}_2\text{SO}_4$   
413 and  $\text{HNO}_3$  are the potential erosion agents in chemical weathering in the SECRB. The  
414  $\delta^{13}\text{C}$  values of the water samples showed a wide range, from -11.0‰ to -24.3‰, with  
415 an average of -19.4‰. The  $\delta^{13}\text{C}$  from soil is governed by the relative contribution  
416 from  $\text{C}_3$  and  $\text{C}_4$  plant (Das et al., 2005). The studied areas have subtropical  
417 temperatures and humidity, and thus  $\text{C}_3$  processes are dominant. The  $\delta^{13}\text{C}$  of soil  $\text{CO}_2$   
418 is derived primarily from  $\delta^{13}\text{C}$  of organic material which typically has a value of -24  
419 to -34‰, with an average of -28‰ (Faure, 1986). According to previous studies, the  
420 average value for  $\text{C}_3$  trees and shrubs are from -24.4 to -30.5‰, and most of them are  
421 lower than -28‰ in south China (Chen et al., 2005; Xiang, 2006; Dou et al., 2013).  
422 After accounting for the isotopic effect from diffusion of  $\text{CO}_2$  from soil, the resulting  
423  $\delta^{13}\text{C}$  (from the terrestrial  $\text{C}_3$  plant process) should be  $\sim$  -25‰ (Cerling et al., 1991).  
424 This mean DIC derived from silicate weathering by carbonic acid (100% from soil  
425  $\text{CO}_2$ ) would yield a  $\delta^{13}\text{C}$  value of -25‰. Carbonate rocks are generally derived from  
426 marine system and, typically, have  $\delta^{13}\text{C}$  value close to zero (Das et al., 2005). Thus,  
427 the theoretical  $\delta^{13}\text{C}$  value of DIC derived from carbonate weathering by carbonic acid  
428 (50% from soil  $\text{CO}_2$  and 50% from carbonate rocks) is -12.5‰. DIC derived from  
429 carbonate weathering by sulfuric acid are all from carbonate rocks, thus the  $\delta^{13}\text{C}$  of

430 the DIC would be 0%. Based on these conclusions, sources of riverine DIC from  
 431 different end-members in the SECRB were plotted in Fig. 7. Most water samples drift  
 432 away from the three endmember mixing area (carbonate and silicate weathering by  
 433 carbonic acid and carbonate weathering by sulfuric acid) and towards the silicate  
 434 weathering by sulfuric and nitric acid area, clearly illustrating the effect of the  
 435 anthropogenic sourced protons on silicate weathering in the SECRB.

436 Considering the H<sub>2</sub>SO<sub>4</sub> and HNO<sub>3</sub> effect on chemical weathering, CO<sub>2</sub>  
 437 consumption by silicate weathering can be determined from the equation below  
 438 (Moon et al., 2007; Ryu et al., 2008; Shin et al., 2011):

$$439 \quad [\text{CO}_2]_{\text{SSW}} = [\text{Na}]_{\text{sil}} + [\text{K}]_{\text{sil}} + 2[\text{Ca}]_{\text{sil}} + 2[\text{Mg}]_{\text{sil}} - \gamma \times [2\text{SO}_4 + \text{NO}_3]_{\text{atmos}} \quad (6)$$

440 Where  $\gamma$  is calculated by  $\text{cation}_{\text{sil}} / (\text{cation}_{\text{sil}} + \text{cation}_{\text{carb}})$ .

441 Based on the calculation in section 5.1, SO<sub>4</sub><sup>2-</sup> and NO<sub>3</sub><sup>-</sup> in river waters were  
 442 mainly derived from atmospheric input. Assuming SO<sub>4</sub><sup>2-</sup> and NO<sub>3</sub><sup>-</sup> in river waters  
 443 derived from atmospheric input (after correction for sea-salt contribution) are all from  
 444 acid precipitation, CO<sub>2</sub> consumption rates by silicate weathering (SSW) are estimated  
 445 between 55×10<sup>3</sup> mol km<sup>-2</sup> a<sup>-1</sup> and 286×10<sup>3</sup> mol km<sup>-2</sup> a<sup>-1</sup> for major river watersheds in  
 446 the SECRB. For the whole SECRB, the actual CO<sub>2</sub> consumption rates by silicate is  
 447 191×10<sup>3</sup> mol km<sup>-2</sup> a<sup>-1</sup> when the effect of H<sub>2</sub>SO<sub>4</sub> and HNO<sub>3</sub> is considered. The flux of  
 448 CO<sub>2</sub> consumption is overestimated by 16.1×10<sup>9</sup> mol a<sup>-1</sup> (0.19×10<sup>12</sup> g C a<sup>-1</sup>) due to the  
 449 involvement of H<sub>2</sub>SO<sub>4</sub> and HNO<sub>3</sub> from acid precipitation, accounting for  
 450 approximately 33.6% of total CO<sub>2</sub> consumption flux by silicate weathering in the  
 451 SECRB. It highlights the fact that the drawdown of atmospheric CO<sub>2</sub> by silicate

452 weathering can be significantly overestimated if acid deposition is ignored in long-  
453 term perspectives. The result is important as it quantitatively shows that  
454 anthropogenic activities can significantly affect rock weathering and associated  
455 atmospheric CO<sub>2</sub> consumption. The quantification of this effect needs to be well  
456 evaluated in Asian and global scale within the current and future human activity  
457 background.

## 458 **6. Conclusions**

459 River waters in the southeast coastal region of China are characterized by high  
460 proportions of Na<sup>+</sup>, K<sup>+</sup> and dissolved SiO<sub>2</sub>, indicating water chemistry of the rivers in  
461 the SECRB is mainly controlled by silicate weathering. The dissolved cationic loads  
462 of the rivers in the study area originate dominantly from silicate weathering, which  
463 accounts for 39.5% (17.8-74.0%) of the total cationic loads. Carbonate weathering,  
464 atmospheric and anthropogenic inputs account for 30.6%, 14.3% and 15.7%,  
465 respectively. Meanwhile, more than 70% of SO<sub>4</sub><sup>2-</sup> and NO<sub>3</sub><sup>-</sup> in the river waters derived  
466 from atmospheric input. The chemical weathering rate of silicates and carbonates for  
467 the whole SECRB are estimated to be approximately 23.7 and 24.5 ton km<sup>-2</sup> a<sup>-1</sup>.  
468 About 8.04×10<sup>6</sup> t a<sup>-1</sup> of dissolved solids originating from rock weathering are  
469 transported into the East and South China Sea by these rivers in the SECRB. With the  
470 assumption that all the protons involved in the weathering reaction are provided by  
471 carbonic acid, the CO<sub>2</sub> consumption rates by silicate and carbonate weathering are  
472 287 and 251×10<sup>3</sup> mol km<sup>-2</sup> a<sup>-1</sup>, respectively. However, both water chemistry and  
473 carbon isotope data provide evidence that sulfuric and nitric acid from acid

474 precipitation serves as significant agents during chemical weathering. Considering the  
475 effect of sulfuric and nitric acid, the CO<sub>2</sub> consumption rate by silicate weathering for  
476 the SECRB are  $191 \times 10^3 \text{ mol km}^{-2} \text{ a}^{-1}$ . Therefore, the CO<sub>2</sub> consumption flux would be  
477 overestimated by  $16.1 \times 10^9 \text{ mol a}^{-1}$  ( $0.19 \times 10^{12} \text{ g C a}^{-1}$ ) in the SECRB if the effect of  
478 sulfuric and nitric acid is ignored. This work illustrates that anthropogenic disturbance  
479 by acid precipitation has profound impact on CO<sub>2</sub> sequestration by rock weathering.

480 **Acknowledgements.** This work was financially supported by the "Strategic Priority  
481 Research Program" of the Chinese Academy of Sciences (Grant No. XDB15010405),  
482 and Natural Science Foundation of China (Grant No. 41673020, 91747202, 41772380  
483 and 41730857).

484 **References:**

485 Amiotte-Suchet, P., Probst, A. Probst, J.-L., Influence of acid rain on CO<sub>2</sub>  
486 consumption by rock weathering: local and global scales. *Water Air Soil Pollut.*  
487 85, 1563-1568, 1995.

488 Amiotte-Suchet, P., Probst, J.-L. Ludwig, W., Worldwide distribution of continental  
489 rock lithology: implications for the atmospheric/soil CO<sub>2</sub> uptake by continental  
490 weathering and alkalinity river transport to the oceans. *Global Biogeochem.*  
491 *Cycles* 17, 1038-1052, 2003.

492 Bai, H., Song, L.S., Xia, W.P., Prospect analysis of hot dry rock (HDR) in Eastern part  
493 of Jiangxi province, *Coal Geol. China* 26, 41-44. (In Chinese), 2014.

494 Berner, R.A., Caldeira, K., The need for mass balance and feedback in the  
495 geochemical carbon cycle. *Geology* 25, 955-956, 1997.

496 Bluth, G.J.S., Kump, L.R., Lithological and climatological controls of river chemistry.  
497 *Geochim. Cosmochim. Acta* 58, 2341-2359, 1994.

498 Brantley, S.L., Lebedeva, M., Learning to read the chemistry of regolith to understand  
499 the Critical Zone. *Annual Review of Earth and Planetary Sciences*, 39: 387-416,  
500 2011.

501 Calmels, D., Gaillardet, J., Brenot, A., France-Lanord, C., Sustained sulfide oxidation  
502 by physical erosion processes in the Mackenzie River basin: climatic  
503 perspectives. *Geology* 35, 1003-1006, 2007.

504 Calmels, D., Galy, A., Hovius, N., Bickle, M., West, A.J., Chen, M.-C., Chapman, H.,  
505 Contribution of deep groundwater to the weathering budget in a rapidly eroding  
506 mountain belt, Taiwan. *Earth Planet. Sci. Lett.* 303, 48-58, 2011.

507 Cerling, T.E., Solomon, D.K., Quade, J., Bownman, J.R., On the isotopic composition  
508 of soil CO<sub>2</sub>. *Geochim. Cosmochim. Acta* 55, 3403–3405, 1991.

509 Chen, Q., Shen, C., Sun, Y., Peng, S., Yi, W., Li Z., Jiang, M., Spatial and temporal  
510 distribution of carbon isotopes in soil organic matter at the Dinghushan  
511 Biosphere Reserve, South China. *Plant and Soil*, 273: 115–128, 2005.

512 Cheng, Y., Liu, Y., Huo, M., Sun, Q., Wang, H., Chen, Z., Bai, Y., Chemical  
513 characteristics of precipitation at Nanping Mangdang Mountain in eastern China  
514 during spring. *J. Environ. Sci.* 23, 1350-1358, 2011.

515 Chetelat, B., Liu, C., Zhao, Z., Wang, Q., Li, S., Li, J., Wang, B., Geochemistry of the  
516 dissolved load of the Changjiang Basin rivers: anthropogenic impacts and  
517 chemical weathering. *Geochim. Cosmochim. Acta* 72, 4254-4277, 2008.



518 Cui, J., Zhou, J., Peng, Y., He, Y., Yang, H., Mao, J., Atmospheric wet deposition of  
519 nitrogen and sulfur to a typical red soil agroecosystem in Southeast China  
520 during the ten-year monsoon seasons (2003-2012). *Atmos. Environ.* 82, 121-  
521 129, 2014.

522 Das, A., Krishnaswami, S., Sarin, M.M., Pande, K., Chemical weathering in the  
523 Krishna Basin and Western Ghats of the Deccan Traps, India: Rates of basalt  
524 weathering and their controls. *Geochim. Cosmochim. Acta* 69(8), 2067-2084,  
525 2005.

526 Dou, X., Deng, Q., Li, M., Wang, W., Zhang, Q., Cheng, X., Reforestation of *Pinus*  
527 *massoniana* alters soil organic carbon and nitrogen dynamics in eroded soil in  
528 south China. *Ecological Engineering* 52, 154-160, 2013.

529 Edmond, J.M., Palmer, M.R., Measures, C.I., Grant, B., Stallard, R.F., The fluvial  
530 geochemistry and denudation rate of the Guayana Shield in Venezuela,  
531 Colombia, and Brazil. *Geochim. Cosmochim. Acta* 59, 3301-3325, 1995.

532 Fan, B.L., Zhao, Z.Q., Tao, F.X., Liu, B.J., Tao, Z.H., Gao, S., He, M.Y.,  
533 Characteristics of carbonate, evaporite and silicate weathering in Huanghe River  
534 basin: A comparison among the upstream, midstream and downstream. *J. Asian*  
535 *Earth Sci.* 96, 17-26, 2014.

536 Fang, Y., Wang, X., Zhu, F., Wu, Z., Li, J., Zhong, L., Chen, D., Yoh, M., Three-  
537 decade changes in chemical composition of precipitation in Guangzhou city,  
538 southern China: has precipitation recovered from acidification following  
539 sulphur dioxide emission control? *Tellus B* 65, 1-15, 2013.

540 Faure, G., Principles of Isotope Geology. Wiley, Toronto, pp. 492-493, 1986.

541 FJBGMR: Fujian Bureau of Geology and Mineral Resources, Regional Geology of  
542 Fujian Province. Geol. Publ. House, Beijing, p. 671 (in Chinese with English  
543 abstract), 1985.

544 Gaillardet, J., Dupré, B., Allègre, C.J., Négrel, P., Chemical and physical denudation  
545 in the Amazon River basin. Chem. Geol. 142, 141-173, 1997.

546 Gaillardet, J., Dupré, B., Louvat, P., Allegre, C.J., Global silicate weathering and CO<sub>2</sub>  
547 consumption rates deduced from the chemistry of large rivers. Chem. Geol. 159,  
548 3-30, 1999.

549 Galy, A., France-Lanord, C., Weathering processes in the Ganges-Brahmaputra basin  
550 and the riverine alkalinity budget. Chem. Geol. 159, 31-60, 1999.

551 Gandois, L., Perrin, A.-S., Probst, A., Impact of nitrogenous fertilizer-induced proton  
552 release on cultivated soils with contrasting carbonate contents: A column  
553 experiment. Geochim. Cosmochim. Acta 75, 1185-1198, 2011.

554 Gislason, S.R., Arnorsson, S., Armannsson, H., Chemical weathering of basalt in  
555 southwest Iceland: effects of runoff, age of rocks and vegetative/glacial cover.  
556 Am. J. Sci. 296, 837-907, 1996.

557 Han, G., Liu, C.Q., Water geochemistry controlled by carbonate dissolution: a study  
558 of the river waters draining karst-dominated terrain, Guizhou Province, China.  
559 Chem. Geol. 204, 1-21, 2004.

560 Han, Z.W., Ueda, H., Sakurai, T., Model study on acidifying wet deposition in East  
561 Asia during wintertime. Atmos. Environ. 40, 2360-2373, 2006.

562 Hartmann, J., Jansen, N., Dürr, H.H., Kempe, S., Köhler, P., Global CO<sub>2</sub> consumption  
563 by chemical weathering: what is the contribution of highly active weathering  
564 regions? *Global Planet. Change* 69, 185-194, 2009.

565 Huang, K., Zhuang, G., Xu, C., Wang Y., Tang A., The chemistry of the severe acidic  
566 precipitation in Shanghai, China. *Atmos. Res.* 89, 149-160, 2008.

567 Huh, Y.S., Chemical weathering and climate - a global experiment: a review. *Geosci.*  
568 *J.* 7, 277-288, 2003.

569 Hydrological data of river basins in Zhejiang, Fujian province and Taiwan region,  
570 *Annual Hydrological Report P. R. China, 2010, Vol (7) (in Chinese)*

571 Ji, H., Jiang, Y., Carbon flux and C, S isotopic characteristics of river waters from a  
572 karstic and a granitic terrain in the Yangtze River system. *J. Asian Earth Sci.* 57,  
573 38-53, 2012.

574 Karim, A., Veizer, H.E., Weathering processes in the Indus River Basin: implication  
575 from riverine carbon, sulphur, oxygen and strontium isotopes. *Chem. Geol.* 170,  
576 153-177, 2000.

577 Kendall, C., Tracing nitrogen sources and cycling in catchments. In: Kendall, C., &  
578 McDonnell, J.J., (Eds) *Isotope Tracers in Catchment Hydrology*. Elsevier,  
579 Amsterdam, 1998.

580 Kump, L.R., Brantley, S.L., Arthur, M.A., Chemical weathering, atmospheric CO<sub>2</sub> and  
581 climate. *Ann. Rev. Earth Planet. Sci.* 28, 611-667, 2000.

582 Larssen, T., Carmichael, G.R., Acid rain and acidification in China: the importance of  
583 base cation deposition. *Environ. Poll.* 110, 89-102, 2000.

584 Larssen, T., Lydersen, E., Tang, D., He, Y., Gao, J., Liu, H., Duan, L., Seip, H.M.,  
585 Acid rain in China. *Environ. Sci. Technol.* 40, 418-425, 2006.

586 Lerman, A., Wu, L., CO<sub>2</sub> and sulfuric acid controls of weathering and river water  
587 composition. *J. Geochem. Explor.* 88, 427-430, 2006.

588 Lerman, A., Wu, L., Mackenzie, F.T., CO<sub>2</sub> and H<sub>2</sub>SO<sub>4</sub> consumption in weathering and  
589 material transport to the ocean, and their role in the global carbon balance. *Mar.*  
590 *Chem.* 106, 326-350, 2007.

591 Li, S., Bush, R.T., Changing fluxes of carbon and other solutes from the Mekong  
592 River. *Sci. Rep.* 5, 16005, 2015.

593 Li, S.Y., Lu, X.X., Bush, R.T., Chemical weathering and CO<sub>2</sub> consumption in the  
594 Lower Mekong River. *Sci. Total Environ.* 472, 162-177, 2014.

595 Li, S.Y., Lu, X.X., He, M., Zhou, Y., Bei, R., Li, L., Zieglera, A.D., Major element  
596 chemistry in the Upper Yangtze River: a case study of the Longchuanjiang  
597 River. *Geomorphology* 129, 29-42, 2011.

598 Li, S.Y., Xu, Z.F., Wang, H., Wang, J.H., Zhang, Q.F., Geochemistry of the upper Han  
599 River basin, China. 3: anthropogenic inputs and chemical weathering to the  
600 dissolved load. *Chem. Geol.* 264, 89-95, 2009.

601 Liu, B., Liu, C.-Q., Zhang, G., Zhao, Z.-Q., Li, S.-L., Hu, J., Ding, H., Lang, Y.-C.,  
602 Li, X.-D., Chemical weathering under mid- to cool temperate and monsoon-  
603 controlled climate: A study on water geochemistry of the Songhuajiang River  
604 system, northeast China. *Appl. Geochem.* 31, 265-278, 2013.

605 Liu, L., Zhang, X., Wang, S., Zhang, W., Lu, X., Bulk sulfur (S) deposition in China.

606 Atmos. Environ., 135, 41-49, 2016.

607 Liu, W., Shi, C., Xu, Z., Zhao, T., Jiang, H., Liang, C., Zhang, X., Zhou, Li., Yu, C.,  
608 Water geochemistry of the Qiantangjiang River, East China: Chemical  
609 weathering and CO<sub>2</sub> consumption in a basin affected by severe acid deposition.  
610 J.Asian Earth Sci., 127, 246-256, 2016.

611 Lu, C., Tian, H., Spatial and temporal patterns of nitrogen deposition in China:  
612 Synthesis of observational data. J. Geophys. Res. 112, D22S05, 2007.

613 Lu, Z., Zhang, Q., Streets, D.G., Sulfur dioxide and primary carbonaceous aerosol  
614 emissions in China and India, 1996e2010. Atmos. Chem. Phys. 11, 9839-9864,  
615 2011.

616 Millot, R., Gaillardet, J., Dupré, B., Allègre, C.J., Northern latitude chemical  
617 weathering rates: clues from the Mackenzie River Basin, Canada. Geochim.  
618 Cosmochim. Acta 67, 1305-1329, 2003.

619 Millot, R., Gaillardet, J., Dupré, B., Allègre, C.J., The global control of silicate  
620 weathering rates and the coupling with physical erosion: new insights from  
621 rivers of the Canadian Shield. Earth Planet. Sci. Lett. 196, 83-98, 2002.

622 Ministry of Environmental Protection of China, 2009. China Environmental Quality  
623 Report 2008. China Environmental Sciences Press, Beijing. In Chinese.

624 Moon, S., Chamberlain, C.P., Hilley, G.E., New estimates of silicate weathering rates  
625 and their uncertainties in global rivers. Geochim. Cosmochim. Acta 134, 257-  
626 274, 2014.

627 Moon, S., Huh, Y., Qin, J., van Pho, N., Chemical weathering in the Hong (Red) River

628 basin: Rates of silicate weathering and their controlling factors. *Geochim.*  
629 *Cosmochim. Acta* 71, 1411-1430, 2007.

630 Moon, S., Huh, Y., Zaitsev, A., Hydrochemistry of the Amur River: Weathering in a  
631 Northern Temperate Basin. *Aquat. Geochem.*, 15, 497-527, 2009.

632 Mortatti, J., Probst, J.L., Silicate rock weathering and atmospheric/soil CO<sub>2</sub> uptake in  
633 the Amazon basin estimated from river water geochemistry: seasonal and spatial  
634 variations. *Chem. Geol.* 197, 177-196, 2003.

635 Négrel, P., Allègre, C.J., Dupré, B., Lewin, E., Erosion sources determined by  
636 inversion of major and trace element ratios and strontium isotopic ratios in river  
637 water: the Congo Basin Case. *Earth Planet. Sci. Lett.* 120, 59-76, 1993.

638 Noh, H., Huh, Y., Qin, J., Ellis, A., Chemical weathering in the Three Rivers region of  
639 Eastern Tibet. *Geochim. Cosmochim. Acta* 73, 1857-1877, 2009.

640 Oliva, P., Viers, J., Dupré B., Chemical weathering in granitic environments. *Chem.*  
641 *Geol.* 202, 225-256, 2003.

642 Pan, Y., Wang, Y., Tang, G., Wu, D., Spatial distribution and temporal variations of  
643 atmospheric sulfur deposition in Northern China: insights into the potential  
644 acidification risks. *Atmos. Chem. Phys.* 13, 1675-1688, 2013.

645 Pepin, E., Guyot, J.L., Armijos, E., Bazan, H., Fraizy, P., Moquet, J.S., Noriega, L.,  
646 Lavado, W., Pombosa, R. Vauchel, P., Climatic control on eastern Andean  
647 denudation rates (Central Cordillera from Ecuador to Bolivia). *J. S. Am. Earth*  
648 *Sci.* 44, 85-93, 2013.

649 Perrin, A.-S., Probst, A., Probst, J.-L., Impact of nitrogenous fertilizers on carbonate

650 dissolution in small agricultural catchments: Implications for weathering CO<sub>2</sub>  
651 uptake at regional and global scales. *Geochim. Cosmochim. Acta* 72, 3105-  
652 3123, 2008.

653 Probst, A., Gh'mari, A.El., Aubert, D., Fritz, B., McNutt, R., Strontium as a tracer of  
654 weathering processes in a silicate catchment polluted by acid atmospheric  
655 inputs, Strengbach, France. *Chem. Geol.* 170, 203-219, 2000.

656 Raymo, M.E., Ruddiman, W.F., Tectonic forcing of late Cenozoic climate. *Nature* 359,  
657 117-122, 1992.

658 Raymond, P. A., Oh, N.H., Turner, R.E., Broussard, W., Anthropogenically enhanced  
659 fluxes of water and carbon from the Mississippi River. *Nature* 451, 449-452,  
660 2008.

661 Regnier, P., Friedlingstein, P., Ciais, P., Mackenzie, F.T.,...Thullner. M.,  
662 Anthropogenic perturbation of the carbon fluxes from land to ocean. *Nature*  
663 *Geosci.* 6, 597-607. 2013.

664 Reuss, J.O., Cosby, B.J., Wright, R.F., Chemical processes governing soil and water  
665 acidification. *Nature* 329, 27-32, 1987.

666 Roy, S., Gaillardet, J., Allègre, C.J., Geochemistry of dissolved and suspended loads  
667 of the Seine river, France: anthropogenic impact, carbonate and silicate  
668 weathering. *Geochim. Cosmochim. Acta* 63, 1277-1292, 1999.

669 Ryu, J.S., Lee, K.S., Chang, H.W., Shin, H.S., Chemical weathering of carbonates and  
670 silicates in the Han River basin, South Korea. *Chem. Geol.* 247, 66-80, 2008.

671 Semhi, K., Amiotte Suchet, P., Clauer, N., Probst, J.-L., Impact of nitrogen fertilizers

672 on the natural weathering-erosion processes and fluvial transport in the Garonne  
673 basin. *Appl. Geochem.* 15 (6), 865-874, 2000.

674 Shi, C., Chemical characteristics and weathering of rivers in the Coast of Southeast  
675 China (PhD Thesis). Institute of Geology and Geophysics, Chinese academy of  
676 sciences, Beijing, China. pp, 1-100 (in Chinese with English abstract), 2014.

677 Shin, W.-J., Ryu, J.-S., Park, Y., Lee, K.-S., Chemical weathering and associated CO<sub>2</sub>  
678 consumption in six major river basins, South Korea. *Geomorphology* 129, 334-  
679 341, 2011.

680 Shu, L.S., Zhou, X.M., Deng, P., Wang, B., Jiang, S.Y., Yu, J.H., Zhao, X.X.,  
681 Mesozoic tectonic evolution of the Southeast China Block: New insights from  
682 basin analysis. *J. Asian Earth Sci.* 34(3), 376-391, 2009.

683 Spence, J., Telmer, K., The role of sulfur in chemical weathering and atmospheric  
684 CO<sub>2</sub> fluxes: Evidence from major ions,  $\delta^{13}\text{C}_{\text{DIC}}$ , and  $\delta^{34}\text{S}_{\text{SO}_4}$  in rivers of the  
685 Canadian Cordillera. *Geochim. Cosmochim. Acta* 69, 5441-5458, 2005.

686 Stallard, R.F., Edmond, J.M., Geochemistry of the Amazon. Precipitation chemistry  
687 and the marine contribution to the dissolved load at the time of peak discharge.  
688 *J. Geophys. Res.*, 86, 9844-9858, 1981.

689 U.S. Nat. Res. Council Comm., Basic Research Opportunities in Earth Science.  
690 Washington, DC: Nat. Acad. 154 pp., 2001.

691 Viers, J., Dupré, B., Braun, J.J., Freydier, R., Greenberg, S., Ngoupayou, J.N.,  
692 Nkamdjou, L.S., Evidence for non-conservative behavior of chlorine in humid  
693 tropical environments. *Aquat. Geochem.* 7, 127-154, 2001.



694 Vries, W.D., Reinds, G.J. Vel E., Intensive monitoring of forest ecosystems in Europe.  
695 2-Atmospheric deposition and its impacts on soil solution chemistry. *For. Ecol.*  
696 *Manage.* 174, 97-115, 2003.

697 Wang, T.J., Jin, L.S., Li, Z.K., Lam K.S., A modeling study on acid rain and  
698 recommended emission control strategies in China. *Atmos. Environ.* 34, 4467-  
699 4477, 2000.

700 West, A.J., Galy, A., Bickle, M., Tectonic and climatic controls on silicate weathering.  
701 *Earth Planet. Sci. Lett.* 235, 211-228, 2005.

702 Wu, W., Zheng, H., Yang, J., Luo, C., Zhou, B., Chemical weathering, atmospheric  
703 CO<sub>2</sub> consumption, and the controlling factors in a subtropical metamorphic-  
704 hosted watershed. *Chem. Geol.* 356, 141-150, 2013.

705 Xiang, L., Study on Coupling between Water and Carbon of Artificial Forests  
706 Communities in Subtropical Southern China. Master Dissertation, Institute of  
707 Geographical Sciences and Natural Sources, Chinese Academy of Sciences,  
708 China (in Chinese), 2006.

709 Xu, H., Bi, X-H., Feng, Y-C., Lin, F-M., Jiao, L., Hong, S-M., Liu, W-G., Zhang, X.-  
710 Y., Chemical composition of precipitation and its sources in Hangzhou, China.  
711 *Environ. Monit. Assess.* 183:581-592, 2011.

712 Xu, Y., Wang C.Y., Zhao T., Using detrital zircons from river sands to constrain major  
713 tectono-thermal events of the Cathaysia Block, SE China. *J. Asian Earth Sci.*  
714 124, 1-13, 2016.

715 Xu, Z., Liu, C.-Q., Chemical weathering in the upper reaches of Xijiang River

716 draining the Yunnan-Guizhou Plateau, Southwest China. *Chem. Geol.* 239, 83-  
717 95, 2007.

718 Xu, Z., Liu, C.-Q., Water geochemistry of the Xijiang basin rivers, South China:  
719 Chemical weathering and CO<sub>2</sub> consumption. *Appl. Geochem.* 25, 1603-1614,  
720 2010.

721 Yoshimura, K., Nakao, S., Noto, M., Inokura, Y., Urata, K., Chen, M., Lin, P.W.,  
722 Geochemical and stable isotope studies on natural water in the Taroko Gorge  
723 karst area, Taiwan - chemical weathering of carbonate rocks by deep source  
724 CO<sub>2</sub> and sulfuric acid. *Chem. Geol.* 177, 415–430, 2001.

725 Zhang, M., Wang, S., Wu, F., Yuan, X., Zhang, Y., Chemical compositions of wet  
726 precipitation and anthropogenic influences at a developing urban site in  
727 southeastern China. *Atmos. Res.* 84, 311-322, 2007a.

728 Zhang, S.R., Lu, X. X., Higgitt, D. L., Chen, C.T.A., Sun, H.-G., Han, J.T., Water  
729 chemistry of the Zhujiang (Pearl River): Natural processes and anthropogenic  
730 influences. *J. Geophys. Res.* 112, F01011, 2007b.

731 Zhao, W., An analysis on the changing trend of acid rain and its causes in Fujian  
732 Province. *Fujian Geogr.* 19, 1-5 (in Chinese), 2004.

733 Zhou, X.M., Li, W.X., Origin of Late Mesozoic igneous rocks in Southeastern China:  
734 Implications for lithosphere subduction and underplating of mafic magmas.  
735 *Tectonophysics* 326(3-4), 269-287, 2000.

736 Zhou, X.M., Sun, T., Shen, W.Z., et al., Petrogenesis of Mesozoic granitoids and  
737 volcanic rocks in South China: A response to tectonic evolution. *Episodes* 29(1),

738 26-33, 2006.

739 ZJBGMR: Zhejiang Bureau of Geology and Mineral Resources, Regional Geology of

740 Zhejiang Province. Geol. Publ. House, Beijing, p. 617 (in Chinese with English

741 abstract), 1989.

Table 1 Chemical and carbon isotopic compositions of river waters in the Southeast Coastal Rivers Basin (SECRB) of China.

| Rivers    | Sample number | Date (M/D/Y) | pH   | T °C  | EC $\mu\text{s cm}^{-1}$ | Na <sup>+</sup> $\mu\text{M}$ | K <sup>+</sup> $\mu\text{M}$ | Mg <sup>2+</sup> $\mu\text{M}$ | Ca <sup>2+</sup> $\mu\text{M}$ | F <sup>-</sup> $\mu\text{M}$ | Cl <sup>-</sup> $\mu\text{M}$ | NO <sub>3</sub> <sup>-</sup> $\mu\text{M}$ | SO <sub>4</sub> <sup>2-</sup> $\mu\text{M}$ | HCO <sub>3</sub> <sup>-</sup> $\mu\text{M}$ | SiO <sub>2</sub> $\mu\text{M}$ | TZ <sup>+</sup> $\mu\text{Eq}$ | TZ <sup>-</sup> $\mu\text{Eq}$ | NICB % | $\delta^{13}\text{C}$ ‰ | TDS $\text{mg l}^{-1}$ |
|-----------|---------------|--------------|------|-------|--------------------------|-------------------------------|------------------------------|--------------------------------|--------------------------------|------------------------------|-------------------------------|--------------------------------------------|---------------------------------------------|---------------------------------------------|--------------------------------|--------------------------------|--------------------------------|--------|-------------------------|------------------------|
| Qiantang* | 1             | 07-8-10      | 7.42 | 28.78 | 190                      | 347                           | 197                          | 106                            | 473                            | 12.0                         | 303                           | 62.6                                       | 147                                         | 1130                                        | 148                            | 1703                           | 1789                           | -5.0   | -19.0                   | 144                    |
|           | 2             | 07-9-10      | 7.60 | 23.84 | 146                      | 87.5                          | 204                          | 80.9                           | 496                            | 11.7                         | 75.2                          | 124                                        | 121                                         | 907                                         | 156                            | 1446                           | 1348                           | 6.7    | -19.8                   | 119                    |
|           | 3             | 07-9-10      | 7.37 | 27.83 | 308                      | 555                           | 233                          | 208                            | 698                            | 41.8                         | 312                           | 223                                        | 437                                         | 1170                                        | 170                            | 2601                           | 2579                           | 0.9    | -17.8                   | 204                    |
|           | 4             | 07-10-10     | 7.27 | 26.28 | 177                      | 176                           | 135                          | 116                            | 544                            | 15.7                         | 151                           | 142                                        | 170                                         | 985                                         | 175                            | 1632                           | 1618                           | 0.8    | -19.3                   | 135                    |
|           | 5             | 07-10-10     | 7.05 | 24.15 | 123                      | 130                           | 101                          | 66.2                           | 349                            | 17.7                         | 94.3                          | 124                                        | 157                                         | 529                                         | 169                            | 1061                           | 1061                           | 0.0    | -18.7                   | 91.2                   |
|           | 6             | 07-10-10     | 7.24 | 23.75 | 140                      | 97.6                          | 69.7                         | 81.0                           | 451                            | 20.0                         | 62.1                          | 109                                        | 204                                         | 703                                         | 164                            | 1231                           | 1282                           | -4.2   | -21.3                   | 106.6                  |
|           | 7             | 07-11-10     | 7.40 | 23.23 | 107                      | 92.5                          | 70.5                         | 68.3                           | 327                            | 14.9                         | 74.9                          | 104                                        | 147                                         | 486                                         | 156                            | 954                            | 960                            | -0.6   | -21.0                   | 82.2                   |
|           | 8             | 07-11-10     | 7.16 | 27.61 | 281                      | 361                           | 87.5                         | 128                            | 469                            | 26.8                         | 245                           | 191                                        | 239                                         | 810                                         | 179                            | 1642                           | 1724                           | -5.0   | -12.9                   | 137.5                  |
|           | 9             | 07-11-10     | 7.02 | 26.48 | 140                      | 275                           | 120                          | 60.7                           | 319                            | 36.2                         | 199                           | 150                                        | 180                                         | 437                                         | 236                            | 1155                           | 1146                           | 0.8    | -13.9                   | 100.2                  |
|           | 10            | 07-12-10     | 7.05 | 24.24 | 99                       | 205                           | 114                          | 58.3                           | 285                            | 14.6                         | 191                           | 114                                        | 132                                         | 305                                         | 278                            | 1005                           | 874                            | 13.1   | -20.9                   | 85.4                   |
|           | 11            | 07-12-10     | 7.05 | 27.01 | 102                      | 123                           | 133                          | 49.8                           | 284                            | 18.6                         | 86.5                          | 123                                        | 144                                         | 377                                         | 183                            | 924                            | 874                            | 5.4    | -19.2                   | 79.4                   |
|           | 12            | 07-12-10     | 7.99 | 24.18 | 260                      | 50.0                          | 85.4                         | 212                            | 993                            | -                            | 66.8                          | 153                                        | 235                                         | 1822                                        | 172                            | 2546                           | 2512                           | 1.4    | -17.6                   | 205.2                  |
|           | 13            | 07-12-10     | 7.86 | 24.59 | 231                      | 43.5                          | 88.4                         | 189                            | 859                            | -                            | 55.1                          | 97.6                                       | 169                                         | 1763                                        | 170                            | 2228                           | 2253                           | -1.1   | -18.7                   | 185.4                  |
|           | 14            | 07-12-10     | 7.69 | 22.66 | 131                      | 44.1                          | 81.0                         | 113                            | 458                            | -                            | 19.1                          | 95.2                                       | 107                                         | 920                                         | 143                            | 1266                           | 1248                           | 1.4    | -18.1                   | 106.8                  |
|           | 15            | 07-12-10     | 7.65 | 24.48 | 106                      | 61.1                          | 98.3                         | 87.9                           | 335                            | -                            | 37.2                          | 68.3                                       | 112                                         | 663                                         | 164                            | 1005                           | 992                            | 1.4    | -18.6                   | 87.3                   |
|           | 16            | 07-12-10     | 7.46 | 23.68 | 125                      | 64.3                          | 108                          | 117                            | 406                            | -                            | 25.9                          | 75.0                                       | 174                                         | 687                                         | 164                            | 1218                           | 1136                           | 6.7    | -20.0                   | 98.8                   |
|           | 17            | 07-13-10     | 7.33 | 24.08 | 139                      | 59.8                          | 116                          | 136                            | 429                            | -                            | 29.6                          | 80.4                                       | 209                                         | 752                                         | 162                            | 1305                           | 1281                           | 1.9    | -20.8                   | 108.1                  |
|           | 18            | 07-10-10     | 7.27 | 25.74 | 141                      | 163                           | 114                          | 69.6                           | 396                            | 27.3                         | 126                           | 148                                        | 161                                         | 597                                         | 153                            | 1209                           | 1195                           | 1.1    | -21.0                   | 101.0                  |
| Cao'e     | 19            | 07-16-10     | 7.17 | 22.27 | 108                      | 212                           | 86.3                         | 69.4                           | 183                            | 5.1                          | 151                           | 148                                        | 114                                         | 384                                         | 216                            | 803                            | 912                            | -13.5  | -21.2                   | 79.1                   |
|           | 20            | 07-16-10     | 7.06 | 26.57 | 182                      | 401                           | 77.6                         | 145                            | 275                            | 18.3                         | 269                           | 185                                        | 245                                         | 534                                         | 215                            | 1318                           | 1478                           | -12.2  | -20.5                   | 116.9                  |
|           | 21            | 07-16-10     | 7.14 | 27.26 | 171                      | 333                           | 91.3                         | 164                            | 362                            | 18.1                         | 224                           | 194                                        | 207                                         | 658                                         | 225                            | 1475                           | 1490                           | -1.0   | -20.9                   | 123.3                  |
|           | 22            | 07-16-10     | 7.08 | 27.17 | 173                      | 346                           | 94.4                         | 168                            | 364                            | 18.8                         | 247                           | 200                                        | 211                                         | 656                                         | 222                            | 1506                           | 1526                           | -1.3   | -13.0                   | 125.2                  |
| Ling      | 23            | 07-15-10     | 7.07 | 24.14 | 52                       | 164                           | 42.9                         | 34.9                           | 140                            | 4.9                          | 40.7                          | 61.5                                       | 68.3                                        | 277                                         | 190                            | 558                            | 516                            | 7.6    | -12.8                   | 52.1                   |
|           | 24            | 07-15-10     | 7.02 | 26.04 | 74                       | 169                           | 92.0                         | 34.2                           | 150                            | 6.4                          | 87.0                          | 77.3                                       | 92.8                                        | 272                                         | 196                            | 629                            | 622                            | 1.1    | -20.8                   | 59.5                   |
|           | 25            | 07-16-10     | 7.34 | 25.03 | 92                       | 159                           | 80.1                         | 47.3                           | 235                            | 19.3                         | 78.0                          | 71.4                                       | 105                                         | 455                                         | 187                            | 804                            | 815                            | -1.4   | -22.5                   | 73.9                   |
|           | 26            | 07-16-10     | 7.40 | 26.75 | 113                      | 216                           | 77.8                         | 57.1                           | 249                            | 20.2                         | 133                           | 90.0                                       | 115                                         | 494                                         | 196                            | 905                            | 946                            | -4.5   | -12.7                   | 82.8                   |
|           | 27            | 07-16-10     | 7.39 | 26    | 89                       | 174                           | 86.4                         | 56.4                           | 209                            | 9.0                          | 99.3                          | 78.4                                       | 99.9                                        | 420                                         | 199                            | 792                            | 798                            | -0.8   | -14.0                   | 72.7                   |
|           | 28            | 07-15-10     | 6.79 | 22.33 | 75                       | 159                           | 82.7                         | 44.1                           | 143                            | -                            | 107                           | 61.8                                       | 83.4                                        | 306                                         | 144                            | 616                            | 641                            | -4.1   | -21.1                   | 56.5                   |
|           | 29            | 07-15-10     | 8.24 | 27.15 | 129                      | 228                           | 92.1                         | 83.1                           | 317                            | 17.2                         | 177                           | 90.5                                       | 120                                         | 641                                         | 194                            | 1120                           | 1148                           | -2.5   | -19.2                   | 97.8                   |
| Ou        | 30            | 07-13-10     | 8.08 | 28.45 | 48                       | 95.2                          | 107                          | 38.4                           | 92.1                           | 15.2                         | 31.8                          | 43.3                                       | 47.4                                        | 291                                         | 221                            | 463                            | 461                            | 0.4    | -21.7                   | 50.6                   |
|           | 31            | 07-13-10     | 6.71 | 22.97 | 32                       | 60.7                          | 106                          | 12.6                           | 65.0                           | 10.8                         | 28.9                          | 45.0                                       | 48.9                                        | 158                                         | 169                            | 322                            | 329                            | -2.2   | -23.8                   | 36.9                   |
|           | 32            | 07-13-10     | 7.18 | 27.59 | 73                       | 107                           | 127                          | 36.2                           | 175                            | 4.3                          | 57.1                          | 111                                        | 92.0                                        | 283                                         | 210                            | 655                            | 634                            | 3.2    | -23.4                   | 62.9                   |
|           | 33            | 07-13-10     | 6.94 | 24.2  | 44                       | 76.9                          | 112                          | 20.0                           | 99.1                           | 10.9                         | 27.9                          | 63.1                                       | 58.6                                        | 249                                         | 184                            | 427                            | 457                            | -7.0   | -22.5                   | 47.5                   |
|           | 34            | 07-14-10     | 7.16 | 27.45 | 90                       | 187                           | 127                          | 41.2                           | 199.5                          | 17.0                         | 85.6                          | 102                                        | 116                                         | 367                                         | 251                            | 796                            | 787                            | 1.1    | -22.4                   | 76.5                   |
|           | 35            | 07-14-10     | 6.97 | 24.56 | 54                       | 105                           | 50.9                         | 29.2                           | 122                            | 12.2                         | 46.1                          | 67.8                                       | 73.1                                        | 218                                         | 193                            | 460                            | 478                            | -4.1   | -22.5                   | 47.9                   |
|           | 36            | 07-14-10     | 6.82 | 21.12 | 31                       | 76.4                          | 133                          | 12.7                           | 74.5                           | 7.7                          | 20.7                          | 36.8                                       | 49.1                                        | 192                                         | 162                            | 383                            | 348                            | 9.3    | -                       | 39.5                   |
|           | 37            | 07-14-10     | 6.82 | 23.69 | 45                       | 89.5                          | 105                          | 19.0                           | 97.8                           | 10.6                         | 39.6                          | 52.8                                       | 59.1                                        | 231                                         | 185                            | 428                            | 441                            | -3.0   | -22.9                   | 46.2                   |
|           | 38            | 07-15-10     | 6.92 | 24.69 | 37                       | 100                           | 89.3                         | 21.1                           | 49.7                           | 1.7                          | 36.9                          | 45.5                                       | 52.7                                        | 153                                         | 202                            | 331                            | 341                            | -2.9   | -                       | 38.9                   |
|           | 39            | 07-15-10     | 6.90 | 23.86 | 35                       | 92.2                          | 92.0                         | 19.8                           | 61.4                           | 1.9                          | 43.9                          | 47.9                                       | 55.5                                        | 139                                         | 193                            | 347                            | 342                            | 1.4    | -22.3                   | 38.5                   |
|           | 40            | 07-15-10     | 7.09 | 25.56 | 47                       | 117                           | 112                          | 25.7                           | 83.4                           | 8.0                          | 52.4                          | 63.1                                       | 57.4                                        | 232                                         | 193                            | 447                            | 462                            | -3.3   | -22.5                   | 48.1                   |
|           | 41            | 07-14-10     | 6.97 | 24.25 | 53                       | 102                           | 107                          | 27.6                           | 119                            | 13.4                         | 43.5                          | 59.4                                       | 73.2                                        | 277                                         | 183                            | 502                            | 526                            | -4.9   | -13.7                   | 52.3                   |

|         |    |          |      |       |      |      |      |      |      |      |      |      |      |     |     |      |      |      |       |       |
|---------|----|----------|------|-------|------|------|------|------|------|------|------|------|------|-----|-----|------|------|------|-------|-------|
| Feiyun  | 42 | 07-17-10 | 7.28 | 25.19 | 38   | 94.0 | 81.7 | 24.0 | 75.6 | 11.4 | 59.9 | 45.7 | 51.9 | 149 | 151 | 375  | 358  | 4.5  | -     | 37.2  |
|         | 43 | 07-17-10 | 7.08 | 25.61 | 46   | 101  | 79.9 | 33.9 | 93.4 | 4.6  | 66.2 | 55.1 | 52.8 | 223 | 151 | 435  | 450  | -3.3 | -23.7 | 43.5  |
| Jiaoxi  | 44 | 07-17-10 | 7.52 | 26.92 | 47   | 116  | 81.5 | 25.2 | 92.0 | 4.1  | 73.3 | 80.3 | 25.0 | 226 | 151 | 432  | 430  | 0.5  | -23.4 | 43.0  |
|         | 45 | 07-17-10 | 7.45 | 27.46 | 61   | 152  | 90.2 | 34.2 | 119  | -    | 136  | 59.8 | 53.5 | 238 | 184 | 548  | 542  | 1.2  | -23.1 | 51.8  |
|         | 46 | 07-18-10 | 6.90 | 27.66 | 53   | 127  | 88.1 | 33.4 | 94.4 | 7.0  | 123  | 93.1 | 30.4 | 209 | 177 | 471  | 486  | -3.3 | -14.4 | 47.4  |
| Huotong | 47 | 07-18-10 | 7.34 | 24    | 43   | 116  | 78.8 | 26.1 | 58.4 | 5.4  | 68.7 | 49.7 | 20.1 | 197 | 190 | 364  | 355  | 2.3  | -22.8 | 39.6  |
| Ao      | 48 | 07-19-10 | 7.24 | 31.44 | 124  | 294  | 121  | 102  | 209  | 24.3 | 204  | 73.6 | 52.0 | 717 | 370 | 1036 | 1100 | -6.1 | -19.4 | 105.4 |
|         | 49 | 07-19-10 | 7.13 | 27.82 | 46   | 109  | 96.3 | 30.0 | 73.8 | -    | 72.0 | 51.3 | 22.5 | 234 | 236 | 413  | 402  | 2.6  | -     | 46.2  |
|         | 50 | 07-18-10 | 6.98 | 28.65 | 53   | 140  | 88.4 | 40.8 | 100  | 3.0  | 82.9 | 58.6 | 20.9 | 294 | 233 | 511  | 477  | 6.6  | -22.3 | 52.2  |
| Min     | 51 | 07-27-10 | 7.11 | 28.4  | 42   | 116  | 92.0 | 40.5 | 119  | 18.0 | 43.9 | 35.5 | 26.0 | 382 | 182 | 526  | 513  | 2.4  | -19.4 | 52.7  |
|         | 52 | 07-27-10 | 7.17 | 30    | 51   | 102  | 97.9 | 41.7 | 107  | 4.6  | 29.4 | 45.3 | 35.0 | 350 | 221 | 496  | 495  | 0.2  | -     | 53.3  |
|         | 53 | 07-27-10 | 7.08 | 29.4  | 99   | 214  | 92.7 | 46.4 | 126  | 18.4 | 50.1 | 39.8 | 118  | 327 | 154 | 651  | 654  | -0.4 | -20.8 | 74.0  |
|         | 54 | 07-27-10 | 7.06 | 29.1  | 44   | 107  | 99.6 | 28.1 | 114  | 16.4 | 18.7 | 36.4 | 44.3 | 305 | 265 | 491  | 449  | 8.5  | -17.6 | 53.6  |
|         | 55 | 07-27-10 | 7.42 | 29.4  | 57   | 139  | 93.7 | 49.8 | 113  | 3.1  | 67.1 | 56.3 | 26.6 | 384 | 236 | 558  | 561  | -0.5 | -16.4 | 58.6  |
|         | 56 | 07-27-10 | 7.12 | 27.8  | 51   | 103  | 91.0 | 50.8 | 106  | 4.7  | 82.8 | 35.1 | 63.5 | 249 | 225 | 507  | 494  | 2.5  | -     | 51.3  |
|         | 57 | 07-27-10 | 7.08 | 27.5  | 40   | 125  | 45.0 | 36.8 | 107  | 12.1 | 43.6 | 44.5 | 29.3 | 288 | 211 | 457  | 435  | 5.0  | -21.1 | 47.4  |
|         | 58 | 07-27-10 | 6.99 | 27.2  | 52   | 121  | 98.0 | 42.4 | 115  | 16.7 | 87.1 | 36.6 | 70.9 | 277 | 228 | 535  | 542  | -1.4 | -11.4 | 55.3  |
|         | 59 | 07-27-10 | 6.87 | 29    | 59   | 154  | 91.4 | 59.4 | 124  | 16.5 | 77.8 | 36.7 | 88.3 | 272 | 222 | 612  | 563  | 8.0  | -20.3 | 57.2  |
|         | 60 | 07-27-10 | 7.31 | 27.1  | 78   | 109  | 92.1 | 59.1 | 181  | 21.2 | 123  | 37.5 | 78.4 | 355 | 202 | 682  | 672  | 1.4  | -18.7 | 63.1  |
|         | 61 | 07-27-10 | 7.22 | 27.8  | 37   | 122  | 83.3 | 52.8 | 142  | 17.4 | 111  | 37.3 | 80.4 | 288 | 221 | 596  | 597  | -0.2 | -22.3 | 58.1  |
|         | 62 | 07-27-10 | 7.16 | 28.1  | 58   | 104  | 83.3 | 59.3 | 163  | 24.0 | 34.6 | 34.5 | 118  | 294 | 214 | 632  | 599  | 5.2  | -13.4 | 59.5  |
|         | 63 | 07-27-10 | 7.26 | 28.3  | 87   | 139  | 86.1 | 60.9 | 191  | 14.8 | 48.0 | 93.0 | 109  | 347 | 226 | 729  | 707  | 3.0  | -21.4 | 68.6  |
|         | 64 | 07-27-10 | 7.00 | 28.8  | 87   | 127  | 93.1 | 58.7 | 195  | 6.6  | 59.8 | 81.1 | 60.9 | 480 | 232 | 729  | 743  | -2.0 | -11.0 | 74.0  |
|         | 65 | 07-28-10 | 6.97 | 27.9  | 37   | 163  | 82.1 | 52.2 | 140  | 20.2 | 53.1 | 60.0 | 106  | 306 | 221 | 630  | 632  | -0.2 | -     | 61.9  |
|         | 66 | 07-13-10 | 7.07 | 27.96 | 59   | 91.9 | 110  | 40.0 | 127  | 24.8 | 62.0 | 79.3 | 62.3 | 249 | 228 | 535  | 515  | 3.8  | -     | 54.8  |
|         | 67 | 07-28-10 | 7.12 | 29.7  | 38   | 108  | 93.4 | 45.9 | 133  | 12.4 | 48.3 | 34.0 | 56.6 | 368 | 220 | 560  | 564  | -0.7 | -     | 57.7  |
|         | 68 | 07-27-10 | 7.03 | 29.9  | 62   | 128  | 96.7 | 57.6 | 148  | 23.3 | 81.6 | 36.8 | 74.1 | 374 | 203 | 635  | 641  | -0.9 | -12.4 | 61.7  |
|         | 69 | 07-27-10 | 7.01 | 28.8  | 60   | 102  | 89.1 | 73.6 | 138  | 9.6  | 50.6 | 74.1 | 32.7 | 417 | 233 | 615  | 607  | 1.3  | -21.0 | 62.3  |
|         | 70 | 07-27-10 | 7.06 | 26.5  | 37   | 93.5 | 93.1 | 34.7 | 87.3 | -    | 26.6 | 34.8 | 37.1 | 312 | 222 | 431  | 448  | -3.9 | -13.1 | 49.1  |
|         | 71 | 07-27-10 | 7.09 | 26.5  | 25   | 62.6 | 92.7 | 27.0 | 61.5 | 4.7  | 21.5 | 18.6 | 43.4 | 191 | 154 | 332  | 318  | 4.2  | -16.0 | 35.3  |
|         | 72 | 07-28-10 | 7.07 | 30.1  | 39   | 76.3 | 87.9 | 35.1 | 87.6 | 7.4  | 43.1 | 36.6 | 35.5 | 266 | 175 | 409  | 416  | -1.7 | -19.4 | 43.5  |
|         | 73 | 07-27-10 | 7.01 | 28.7  | 47   | 84.9 | 95.4 | 56.7 | 106  | 12.7 | 51.8 | 49.2 | 57.2 | 315 | 211 | 506  | 531  | -4.8 | -     | 53.8  |
|         | 74 | 07-27-10 | 6.85 | 28.7  | 50   | 93.6 | 85.9 | 52.4 | 107  | 14.1 | 62.8 | 57.5 | 57.0 | 252 | 217 | 498  | 487  | 2.2  | -19.9 | 50.9  |
|         | 75 | 07-27-10 | 7.11 | 29.7  | 69   | 117  | 85.2 | 73.4 | 159  | 7.6  | 63.7 | 75.2 | 47.4 | 418 | 230 | 666  | 652  | 2.2  | -22.2 | 65.0  |
|         | 76 | 07-28-10 | 6.93 | 28.9  | 59   | 112  | 88.0 | 61.8 | 122  | 6.0  | 57.4 | 89.3 | 42.0 | 349 | 224 | 568  | 580  | -2.2 | -22.0 | 58.8  |
|         | 77 | 07-21-10 | 7.76 | 32.4  | 51.2 | 163  | 85.5 | 52.8 | 151  | 20.2 | 55.3 | 70.3 | 78.6 | 372 | 175 | 656  | 655  | 0.3  | -12.5 | 61.8  |
|         | 78 | 07-28-10 | 7.29 | 26.8  | 106  | 129  | 75.3 | 84.0 | 321  | 24.0 | 56.2 | 41.0 | 166  | 599 | 202 | 1013 | 1028 | -1.4 | -16.3 | 90.3  |
|         | 79 | 07-21-10 | 7.09 | 26.96 | 56   | 112  | 87.6 | 37.1 | 129  | 4.5  | 51.5 | 44.9 | 61.9 | 327 | 276 | 531  | 547  | -2.9 | -22.2 | 59.1  |
|         | 80 | 07-21-10 | 7.64 | 33.37 | 83   | 114  | 96.2 | 60.6 | 151  | 16.7 | 53.0 | 40.6 | 102  | 371 | 242 | 633  | 670  | -5.8 | -12.8 | 66.2  |
|         | 81 | 07-21-10 | 7.83 | 31.27 | 65   | 131  | 102  | 52.7 | 141  | 16.1 | 45.3 | 49.7 | 91.8 | 324 | 239 | 620  | 603  | 2.8  | -13.4 | 61.8  |
|         | 82 | 07-21-10 | 6.84 | 28.35 | 66   | 132  | 101  | 52.5 | 141  | 5.8  | 63.8 | 54.1 | 91.6 | 304 | 243 | 621  | 606  | 2.5  | -22.7 | 61.5  |
|         | 83 | 07-21-10 | 7.42 | 30.7  | 98   | 217  | 113  | 59.2 | 210  | 18.4 | 98.7 | 63.5 | 84.7 | 496 | 320 | 868  | 827  | 4.6  | -18.9 | 84.5  |
|         | 84 | 07-27-10 | 7.26 | 26.3  | 46   | 104  | 102  | 29.7 | 121  | 3.6  | 55.2 | 51.9 | 55.5 | 294 | 193 | 507  | 512  | -0.9 | -21.6 | 51.9  |
|         | 85 | 07-27-10 | 7.07 | 25.4  | 30   | 73.3 | 99.2 | 19.6 | 78.8 | -    | 22.9 | 40.0 | 49.2 | 203 | 170 | 369  | 365  | 1.3  | -21.1 | 39.8  |
|         | 86 | 07-27-10 | 7.50 | 27.3  | 45   | 102  | 102  | 26.5 | 114  | 2.4  | 35.1 | 39.7 | 57.2 | 260 | 217 | 484  | 449  | 7.3  | -15.7 | 49.6  |
|         | 87 | 07-27-10 | 7.47 | 26.9  | 51   | 141  | 100  | 43.6 | 109  | 7.9  | 79.7 | 42.4 | 57.7 | 311 | 217 | 547  | 548  | -0.3 | -20.1 | 55.6  |

|          |     |          |      |       |     |      |      |       |      |      |      |      |      |     |     |      |      |      |       |       |
|----------|-----|----------|------|-------|-----|------|------|-------|------|------|------|------|------|-----|-----|------|------|------|-------|-------|
|          | 88  | 07-19-10 | 7.99 | 31.74 | 63  | 167  | 96.5 | 33.5  | 115  | 8.0  | 105  | 35.5 | 38.1 | 331 | 218 | 561  | 548  | 2.3  | -13.5 | 55.9  |
|          | 89  | 07-21-10 | 6.77 | 28.19 | 65  | 132  | 93.6 | 56.0  | 145  | 15.6 | 60.6 | 78.8 | 75.4 | 333 | 243 | 627  | 624  | 0.5  | -22.6 | 63.3  |
| Jin      | 90  | 07-27-10 | 7.36 | 25.8  | 128 | 126  | 94.8 | 88.9  | 406  | 22.9 | 51.4 | 39.4 | 229  | 595 | 208 | 1211 | 1143 | 5.6  | -20.7 | 100   |
|          | 91  | 07-27-10 | 7.40 | 26.9  | 123 | 143  | 103  | 82.7  | 347  | 21.0 | 83.5 | 203  | 182  | 463 | 226 | 1105 | 1115 | -0.9 | -21.3 | 98.4  |
|          | 92  | 07-27-10 | 7.00 | 27.4  | 88  | 170  | 98.8 | 56.8  | 205  | 7.2  | 137  | 117  | 106  | 327 | 205 | 793  | 792  | 0.1  | -22.5 | 71.8  |
|          | 93  | 07-27-10 | 7.32 | 28.7  | 73  | 201  | 116  | 87.1  | 318  | 20.0 | 93.5 | 41.5 | 189  | 508 | 267 | 1128 | 1020 | 9.6  | -21.7 | 95.3  |
| Jiulong  | 94  | 07-30-10 | 6.50 | 23.47 | 29  | 72.3 | 92.4 | 22.8  | 59.8 | 12.4 | 25.1 | 27.0 | 50.0 | 189 | 213 | 330  | 341  | -3.4 | -18.1 | 40.1  |
|          | 95  | 07-30-10 | 7.06 | 29.35 | 120 | 136  | 96.9 | 106   | 339  | 5.1  | 67.7 | 66.3 | 249  | 469 | 202 | 1124 | 1100 | 2.1  | -20.8 | 94.2  |
|          | 96  | 07-30-10 | 7.45 | 27.6  | 104 | 79.5 | 97.5 | 106   | 363  | 14.4 | 70.7 | 50.0 | 99.9 | 729 | 184 | 1116 | 1049 | 6.0  | -18.9 | 93.7  |
|          | 97  | 07-31-10 | 7.36 | 26.59 | 139 | 140  | 100  | 142   | 432  | 15.5 | 79.6 | 78.3 | 274  | 573 | 196 | 1388 | 1278 | 8.0  | -19.7 | 108.8 |
|          | 98  | 07-31-10 | 7.72 | 26.18 | 88  | 77.6 | 96.2 | 69.0  | 313  | 19.9 | 39.7 | 34.6 | 63.8 | 731 | 251 | 938  | 933  | 0.5  | -18.4 | 89.4  |
|          | 99  | 07-30-10 | 7.43 | 26.96 | 119 | 200  | 93.8 | 100.2 | 298  | 19.9 | 122  | 80.5 | 225  | 387 | 202 | 1091 | 1040 | 4.7  | -20.5 | 89.5  |
|          | 100 | 07-28-10 | 7.41 | 26.66 | 112 | 173  | 97.9 | 94.4  | 286  | 46.1 | 118  | 152  | 201  | 364 | 207 | 1033 | 1036 | -0.3 | -20.9 | 92.2  |
|          | 101 | 07-29-10 | 7.16 | 29.35 | 82  | 151  | 110  | 55.4  | 178  | 4.9  | 71.2 | 170  | 53.2 | 385 | 305 | 727  | 732  | -0.7 | -21.2 | 76.1  |
|          | 102 | 07-29-10 | 7.10 | 28.9  | 100 | 222  | 98.3 | 49.4  | 249  | 3.6  | 126  | 157  | 52.7 | 532 | 303 | 917  | 920  | -0.3 | -21.7 | 90.0  |
|          | 103 | 07-28-10 | 7.20 | 31.15 | 138 | 339  | 111  | 81.2  | 277  | 9.2  | 280  | 285  | 88.6 | 515 | 317 | 1165 | 1256 | -7.8 | -19.0 | 112   |
|          | 104 | 07-28-10 | 7.16 | 27.09 | 101 | 261  | 95.8 | 81.7  | 235  | 40.3 | 173  | 80.1 | 174  | 291 | 136 | 990  | 892  | 9.9  | -24.3 | 75.4  |
| Zhang    | 105 | 07-28-10 | 8.08 | 30.6  | 93  | 195  | 96.1 | 61.1  | 167  | 16.8 | 157  | 193  | 55.2 | 281 | 288 | 748  | 741  | 0.9  | -21.5 | 73.8  |
| Dongxi   | 106 | 07-28-10 | 7.20 | 30.9  | 78  | 263  | 99.0 | 41.5  | 115  | 14.5 | 238  | 65.3 | 30.0 | 283 | 309 | 675  | 646  | 4.4  | -20.8 | 66.7  |
| Huangang | 107 | 07-28-10 | 7.40 | 30.5  | 99  | 253  | 85.6 | 53.0  | 154  | 7.7  | 190  | 63.5 | 56.4 | 460 | 278 | 754  | 827  | -9.6 | -20.0 | 77.4  |
| Han      | 108 | 07-31-10 | 7.31 | 27.1  | 68  | 136  | 61.5 | 45.2  | 195  | 16.1 | 37.7 | 45.3 | 93.7 | 345 | 218 | 678  | 615  | 9.2  | -21.9 | 62.0  |
|          | 109 | 07-30-10 | 7.38 | 26.94 | 88  | 116  | 103  | 63.6  | 265  | 6.4  | 53.4 | 72.2 | 84.9 | 584 | 244 | 876  | 879  | -0.4 | -20.4 | 83.7  |
|          | 110 | 07-30-10 | 6.66 | 25.55 | 71  | 114  | 96.2 | 47.6  | 168  | 8.0  | 56.9 | 54.6 | 143  | 230 | 203 | 642  | 628  | 2.2  | -17.9 | 59.7  |
|          | 111 | 07-30-10 | 6.66 | 27.76 | 83  | 135  | 104  | 63.8  | 203  | 8.6  | 54.5 | 74.9 | 173  | 302 | 336 | 774  | 777  | -0.4 | -20.6 | 78.7  |
|          | 112 | 07-30-10 | 7.31 | 30.81 | 56  | 168  | 74.0 | 39.1  | 118  | 13.5 | 62.9 | 44.4 | 81.4 | 237 | 245 | 556  | 507  | 8.8  | -21.4 | 54.6  |
|          | 113 | 07-31-10 | 7.28 | 28.73 | 98  | 137  | 99.3 | 85.6  | 270  | 9.2  | 88.8 | 59.1 | 118  | 565 | 233 | 948  | 949  | -0.1 | -19.7 | 86.6  |
|          | 114 | 07-31-10 | 7.27 | 31.42 | 123 | 193  | 105  | 98.2  | 319  | 20.7 | 120  | 102  | 157  | 570 | 229 | 1132 | 1107 | 2.2  | -19.7 | 98.2  |
|          | 115 | 07-30-10 | 7.43 | 29.89 | 85  | 115  | 97.5 | 65.5  | 244  | 6.5  | 46.5 | 58.6 | 103  | 511 | 251 | 832  | 822  | 1.1  | -20.8 | 79.3  |
|          | 116 | 07-31-10 | 7.61 | 30.98 | 99  | 123  | 104  | 85.9  | 264  | 5.6  | 58.8 | 90.9 | 108  | 588 | 98  | 926  | 952  | -2.9 | -20.0 | 79.4  |
|          | 117 | 07-31-10 | 7.31 | 29.96 | 93  | 151  | 103  | 78.1  | 250  | 15.4 | 68.0 | 99.1 | 173  | 379 | 233 | 909  | 891  | 1.9  | -21.9 | 81.8  |
|          | 118 | 07-31-10 | 7.35 | 28.4  | 2   | 233  | 84.2 | 101   | 323  | 12.8 | 84.0 | 101  | 203  | 460 | 229 | 1165 | 1051 | 9.8  | -21.1 | 94.7  |
|          | 119 | 07-31-10 | 7.67 | 30.38 | 93  | 136  | 87.8 | 73.6  | 231  | 16.4 | 64.6 | 94.4 | 184  | 382 | 226 | 834  | 909  | -9.1 | -20.8 | 80.5  |
| Rong     | 120 | 07-30-10 | 7.57 | 31.83 | 68  | 193  | 79.1 | 50.3  | 146  | 16.4 | 192  | 84.0 | 31.5 | 344 | 309 | 664  | 683  | -2.8 | -20.3 | 65.8  |
|          | 121 | 07-30-10 | 6.96 | 30.62 | 94  | 509  | 103  | 56.1  | 213  | 15.9 | 511  | 78.5 | 82.3 | 379 | 222 | 1150 | 1133 | 1.5  | -20.0 | 94.4  |

TZ<sup>+</sup> is the total cationic charge; TZ<sup>-</sup> is the total anionic charge; NICB is the normalized inorganic charge balance and TDS is the total dissolved solid. \*data of major ion composition from the previous work by Liu et al. 2016.

Table 2 Chemical compositions of precipitation at different sites located within the studied area (in  $\mu\text{mol l}^{-1}$  and molar ratio).

| Province | Location | pH   | F <sup>-</sup> | Cl <sup>-</sup> | NO <sub>3</sub> <sup>-</sup> | SO <sub>4</sub> <sup>2-</sup> | NH <sub>4</sub> <sup>+</sup> | K <sup>+</sup> | Na <sup>+</sup> | Ca <sup>2+</sup> | Mg <sup>2+</sup> | NO <sub>3</sub> /Cl | SO <sub>4</sub> /Cl | K/Cl | Na/Cl | Ca/Cl | Mg/Cl | Reference          |  |
|----------|----------|------|----------------|-----------------|------------------------------|-------------------------------|------------------------------|----------------|-----------------|------------------|------------------|---------------------|---------------------|------|-------|-------|-------|--------------------|--|
| Zhejiang | Hangzhou | 4.5  | 5.76           | 13.9            | 38.4                         | 55                            | 79.9                         | 4.18           | 12.2            | 26               | 3.53             | 2.76                | 3.96                | 0.3  | 0.88  | 1.87  | 0.25  | Xu et al., 2011    |  |
|          | Jinhua   | 4.54 | 9.05           | 8.51            | 31.2                         | 47.6                          | 81.1                         | 4.73           | 6.27            | 24               | 1.73             | 3.67                | 5.59                | 0.56 | 0.74  | 2.81  | 0.2   | Zhang et al., 2007 |  |
| Fujian   | Nanping  | 4.81 | 0.8            | 5.8             | 26.6                         | 18.3                          | 38                           | 4.9            | 5.4             | 12.9             | 2.7              | 4.59                | 3.16                | 0.84 | 0.93  | 2.22  | 0.47  | Cheng et al., 2011 |  |
|          | Fuzhou   |      | 5.26           | 21.4            | 24.9                         | 48.5                          | 78.1                         | 4.1            | 2.61            | 32.7             | 1.25             | 1.16                | 2.26                | 0.19 | 0.12  | 1.53  | 0.06  | Zhao, 2004         |  |
|          | Xiamen   | 4.57 | 15.3           | 23.7            | 22.1                         | 31.3                          | 37.7                         | 3.58           | 36.1            | 21.5             | 4.94             | 0.93                | 1.32                | 0.15 | 1.52  | 0.91  | 0.21  | Zhao, 2004         |  |
| Average  |          |      |                |                 |                              |                               |                              |                |                 |                  |                  | 2.62                | 3.26                | 0.41 | 0.84  | 1.87  | 0.24  |                    |  |

Table 3 Contribution of each reservoir, fluxes, chemical weathering and associated CO<sub>2</sub> consumption rates for the major rivers and their main tributaries in the SECRB.

| Major river | Tributaries | Location   | Discharge<br>10 <sup>9</sup> m <sup>3</sup> a <sup>-1</sup> | Area<br>10 <sup>3</sup> km <sup>2</sup> | Runoff<br>mm a <sup>-1</sup> | Contribution (%) |       |      |       | Fluxes<br>(10 <sup>6</sup> ton a <sup>-1</sup> ) |      | Weathering rate<br>(ton km <sup>-2</sup> a <sup>-1</sup> ) |                  |                  |                  | CO <sub>2</sub> consumption rate<br>(10 <sup>3</sup> mol km <sup>-2</sup> a <sup>-1</sup> ) |                  |                  |                  |
|-------------|-------------|------------|-------------------------------------------------------------|-----------------------------------------|------------------------------|------------------|-------|------|-------|--------------------------------------------------|------|------------------------------------------------------------|------------------|------------------|------------------|---------------------------------------------------------------------------------------------|------------------|------------------|------------------|
|             |             |            |                                                             |                                         |                              | Rain             | Anth. | Sil. | Carb. | SWF                                              | CWF  | Cat <sub>sil</sub> <sup>a</sup>                            | SWR <sup>b</sup> | CWR <sup>b</sup> | TWR <sup>b</sup> | CSW <sup>c</sup>                                                                            | CCW <sup>c</sup> | SSW <sup>d</sup> | SSW <sup>e</sup> |
| Qiantang    | Fuyang      |            | 43.81                                                       | 38.32                                   | 1143                         | 9                | 14    | 23   | 54    | 0.66                                             | 1.74 | 6.8                                                        | 17.3             | 45.3             | 62.6             | 223                                                                                         | 459              | 195              | 184              |
|             | Fenshui     | Tonglu     | 2.726                                                       | 3.100                                   | 879                          | 7                | 14    | 18   | 62    | 0.05                                             | 0.16 | 5.5                                                        | 14.7             | 52.1             | 66.8             | 167                                                                                         | 530              | 152              | 146              |
| Cao'e       |             | Huashan    | 2.610                                                       | 3.043                                   | 858                          | 7                | 23    | 26   | 44    | 0.06                                             | 0.11 | 6.8                                                        | 18.2             | 35.4             | 53.5             | 269                                                                                         | 369              | 240              | 229              |
| Ling        | Linhai      |            | 5.400                                                       | 6.613                                   | 817                          | 9                | 22    | 24   | 45    | 0.09                                             | 0.17 | 4.7                                                        | 14.2             | 26.1             | 40.3             | 167                                                                                         | 267              | 143              | 133              |
|             | Yonganxi    | Baizhiao   | 3.184                                                       | 2.475                                   | 1286                         | 14               | 15    | 50   | 21    | 0.06                                             | 0.03 | 9.1                                                        | 24.2             | 11.7             | 35.9             | 350                                                                                         | 119              | 255              | 216              |
|             | Shifengxi   | Shaduan    | 1.731                                                       | 1.482                                   | 1168                         | 11               | 19    | 35   | 36    | 0.03                                             | 0.04 | 7.6                                                        | 21.4             | 24.5             | 45.9             | 304                                                                                         | 249              | 249              | 227              |
| Ou          | Hecheng     |            | 20.65                                                       | 13.45                                   | 1536                         | 20               | 6     | 56   | 18    | 0.36                                             | 0.13 | 10.1                                                       | 26.9             | 9.9              | 36.9             | 360                                                                                         | 101              | 228              | 174              |
|             | Haoxi       | Huangdu    | 1.809                                                       | 1.270                                   | 1447                         | 16               | 8     | 46   | 30    | 0.04                                             | 0.02 | 9.9                                                        | 27.9             | 19.0             | 46.9             | 336                                                                                         | 192              | 246              | 210              |
|             | Xiaoxi      | Jupu       | 5.116                                                       | 3.336                                   | 1534                         | 23               | 0     | 74   | 4     | 0.09                                             | 0.01 | 11.4                                                       | 26.4             | 1.8              | 28.2             | 391                                                                                         | 18               | 202              | 125              |
|             | Nanxi       | Yongjiashi | 1.799                                                       | 1.273                                   | 1413                         | 21               | 9     | 63   | 7     | 0.03                                             | 0.00 | 10.0                                                       | 26.3             | 3.3              | 29.6             | 360                                                                                         | 34               | 200              | 135              |
|             | Huotong     | Yangzhong  | 3.470                                                       | 2.082                                   | 1667                         | 22               | 18    | 54   | 5     | 0.06                                             | 0.00 | 8.3                                                        | 27.3             | 2.1              | 29.4             | 305                                                                                         | 24               | 129              | 59               |
| Ao          |             | Lianjiang  | 2.770                                                       | 3.170                                   | 874                          | 17               | 17    | 48   | 17    | 0.05                                             | 0.02 | 5.1                                                        | 17.3             | 5.4              | 22.7             | 188                                                                                         | 56               | 122              | 95               |
| Min         | Zhuqi       |            | 84.59                                                       | 54.50                                   | 1552                         | 15               | 10    | 48   | 27    | 1.80                                             | 0.94 | 10.3                                                       | 33.0             | 17.3             | 50.2             | 390                                                                                         | 180              | 292              | 252              |
|             | Futun       | Yangkou    | 22.53                                                       | 12.67                                   | 1778                         | 15               | 14    | 49   | 22    | 0.45                                             | 0.21 | 12.0                                                       | 35.8             | 16.2             | 52.0             | 460                                                                                         | 171              | 336              | 286              |
|             | Shaxi       | Shaxian    | 12.87                                                       | 9.922                                   | 1297                         | 13               | 9     | 42   | 36    | 0.26                                             | 0.21 | 8.4                                                        | 26.5             | 21.7             | 48.1             | 315                                                                                         | 222              | 249              | 223              |
|             | Jianxi      | Qilijie    | 24.91                                                       | 14.79                                   | 1685                         | 16               | 10    | 45   | 29    | 0.48                                             | 0.26 | 9.6                                                        | 32.2             | 17.4             | 49.6             | 350                                                                                         | 185              | 250              | 210              |
|             | Youxi       | Youxi      | 5.237                                                       | 4.450                                   | 1177                         | 15               | 8     | 46   | 31    | 0.11                                             | 0.07 | 7.4                                                        | 24.5             | 15.0             | 39.5             | 272                                                                                         | 156              | 205              | 178              |
|             | Dazhangxi   | Yongtai    | 4.205                                                       | 4.034                                   | 1042                         | 15               | 21    | 47   | 17    | 0.08                                             | 0.03 | 6.6                                                        | 20.2             | 7.1              | 27.4             | 242                                                                                         | 73               | 163              | 131              |
| Jin         | Xixi        | Anxi       | 3.004                                                       | 2.466                                   | 1218                         | 9                | 10    | 29   | 52    | 0.06                                             | 0.10 | 7.9                                                        | 24.4             | 42.2             | 66.6             | 284                                                                                         | 430              | 247              | 232              |
|             | Dongxi      | Honglai    | 2.236                                                       | 1.704                                   | 1312                         | 12               | 22    | 28   | 38    | 0.04                                             | 0.04 | 6.8                                                        | 22.9             | 25.6             | 48.5             | 226                                                                                         | 263              | 178              | 158              |
| Jiulong     | Punan       |            | 10.20                                                       | 8.49                                    | 1201                         | 13               | 14    | 28   | 45    | 0.19                                             | 0.29 | 7.3                                                        | 22.2             | 34.0             | 56.2             | 263                                                                                         | 351              | 209              | 188              |
|             | Xi'xi       | zhengdian  | 4.080                                                       | 3.420                                   | 1193                         | 10               | 32    | 25   | 33    | 0.10                                             | 0.11 | 8.0                                                        | 30.7             | 30.9             | 61.6             | 288                                                                                         | 317              | 227              | 203              |
| Zhang       |             | Yunxiao    | 1.011                                                       | 1.038                                   | 974                          | 16               | 25    | 29   | 29    | 0.02                                             | 0.01 | 5.1                                                        | 21.9             | 14.1             | 36.0             | 174                                                                                         | 146              | 114              | 90               |
| Dongxi      |             | Zhao'an    | 1.176                                                       | 0.955                                   | 1231                         | 16               | 41    | 26   | 17    | 0.03                                             | 0.01 | 5.8                                                        | 28.7             | 10.2             | 38.9             | 187                                                                                         | 107              | 93               | 55               |
| Huanggang   |             | Raoping    | 1.637                                                       | 1.621                                   | 1010                         | 15               | 30    | 34   | 21    | 0.04                                             | 0.02 | 6.0                                                        | 22.8             | 11.1             | 33.9             | 227                                                                                         | 115              | 145              | 112              |
| Han         |             | Chao'an    | 24.75                                                       | 29.08                                   | 851                          | 16               | 7     | 38   | 39    | 0.49                                             | 0.50 | 5.4                                                        | 17.0             | 17.0             | 34.0             | 208                                                                                         | 176              | 156              | 135              |

|             |          |       |       |      |    |    |    |    |      |      |     |      |      |      |     |     |     |     |
|-------------|----------|-------|-------|------|----|----|----|----|------|------|-----|------|------|------|-----|-----|-----|-----|
| Ding        | Xikou    | 11.14 | 9.228 | 1207 | 17 | 6  | 46 | 32 | 0.31 | 0.18 | 9.0 | 33.3 | 19.1 | 52.4 | 341 | 196 | 249 | 212 |
| Mei         | Hengshan | 10.29 | 12.95 | 794  | 12 | 13 | 31 | 44 | 0.21 | 0.32 | 5.7 | 16.6 | 24.5 | 41.1 | 212 | 252 | 173 | 157 |
| Whole SECRB |          | 207   | 167   | 1240 |    |    |    |    | 3.95 | 4.09 | 7.8 | 23.7 | 24.5 | 48.1 | 287 | 251 | 218 | 191 |

<sup>a</sup>  $Cat_{sil}$  are calculated based on the sum of cations from silicate weathering.

<sup>b</sup> SWR, CWR and TWR represent silicate weathering rates (assuming all dissolved silica is derived from silicate weathering), carbonate weathering rates and total weathering rates, respectively.

<sup>c</sup>  $CO_2$  consumption rate with assumption that all the protons involved in the weathering reaction are provided by carbonic acid.

<sup>d</sup> Estimated  $CO_2$  consumption rate by silicate weathering when  $H_2SO_4$  from acid precipitation is taken into account.

<sup>e</sup> Estimated  $CO_2$  consumption rate by silicate weathering when  $H_2SO_4$  and  $HNO_3$  from acid precipitation is taken into account.



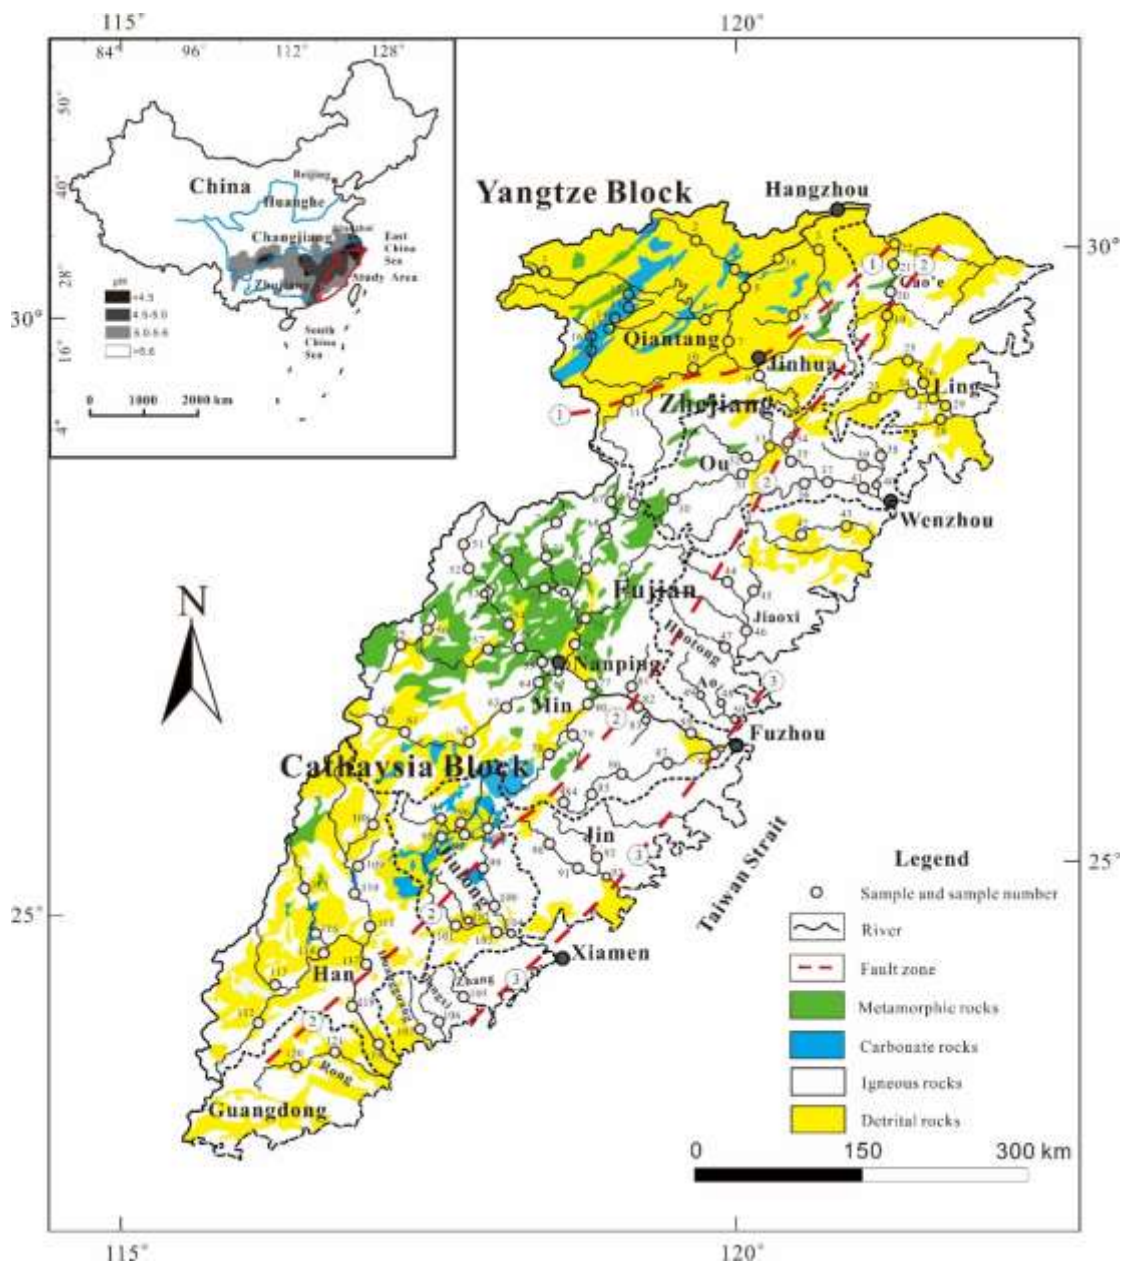

Fig. 1. Sketch map showing the lithology, sampling locations, and sample number of the SECRs drainage basin, and regional rain water pH ranges are shown in the sketch map at the upper-left. (modified from Zhou and Li, 2000; Shu et al., 2009; Xu et al., 2016, rain water acidity distribution of China mainland is from State Environmental Protection Administration of China). ①Shaoxing-Jiangshan fault zone; ②Zhenghe-Dapu fault zone; ③Changle-Nanao fault zone. The figure was created by CorelDraw software version 17.1.

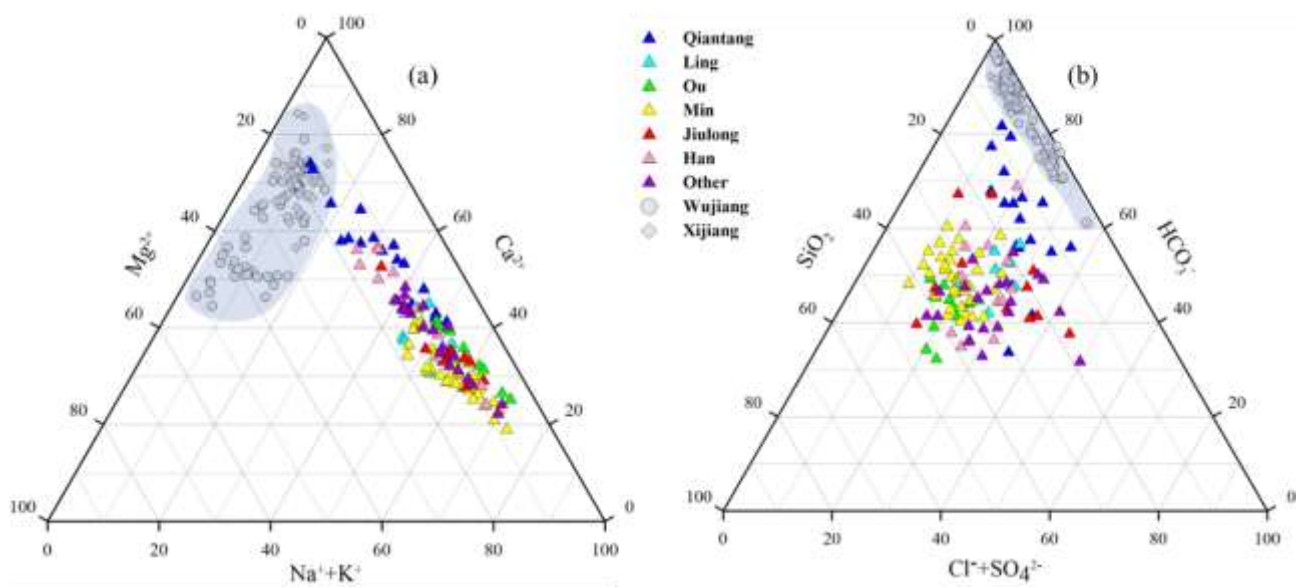

Fig. 2. Ternary diagrams showing cations (a), anions and dissolved  $SiO_2$  (b) compositions of river waters in the SECRB. Chemical compositions from case studies of rivers draining carbonate rocks (the Wujiang and the Xijiang) are also shown for comparison (data from Han and Liu 2004; Xu and Liu 2007, 2010)

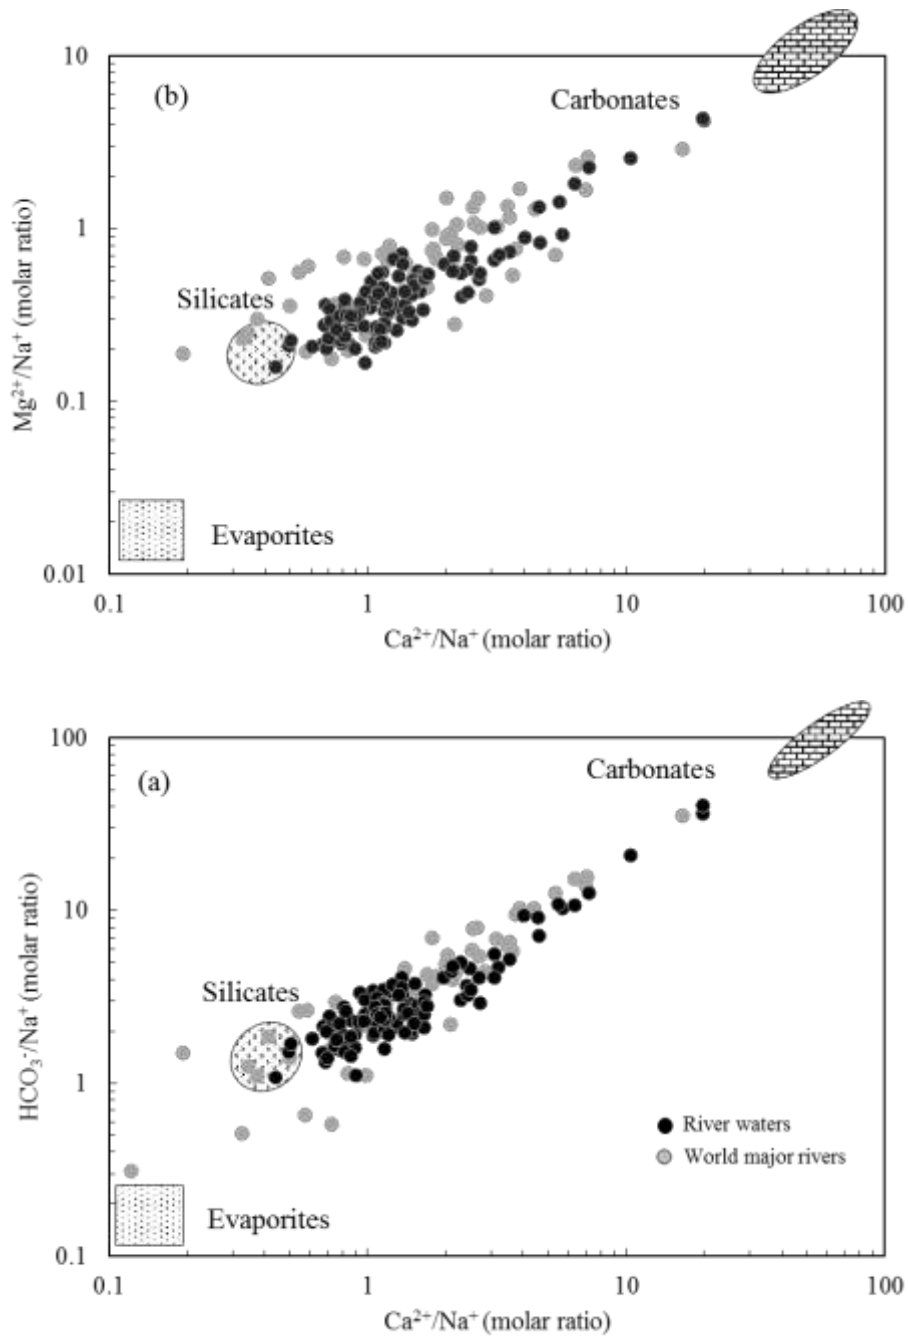

Fig. 3. Mixing diagrams using Na-normalized molar ratios: HCO<sub>3</sub><sup>-</sup>/Na<sup>+</sup> vs. Ca<sup>2+</sup>/Na<sup>+</sup> (a) and Mg<sup>2+</sup>/Na<sup>+</sup> vs. Ca<sup>2+</sup>/Na<sup>+</sup> (b) for the SECRB. The samples mainly cluster on a mixing line between silicate and carbonate end-members. Data for world major rivers are also plotted (data from Gaillardet et al. 1999).

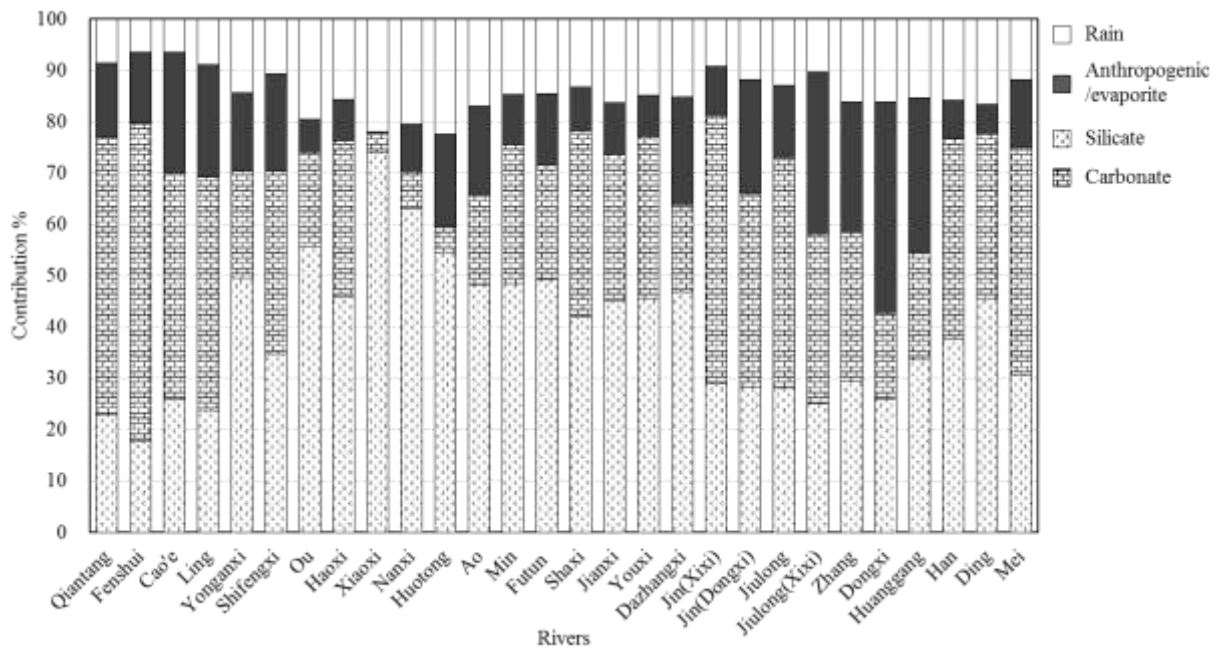

Fig. 4. Calculated contributions (in %) from the different reservoirs to the total cationic load for major rivers and their main tributaries in the SECRB. The cationic load is equal to the sum of  $\text{Na}^+$ ,  $\text{K}^+$ ,  $\text{Ca}^{2+}$  and  $\text{Mg}^{2+}$  from the different reservoirs.

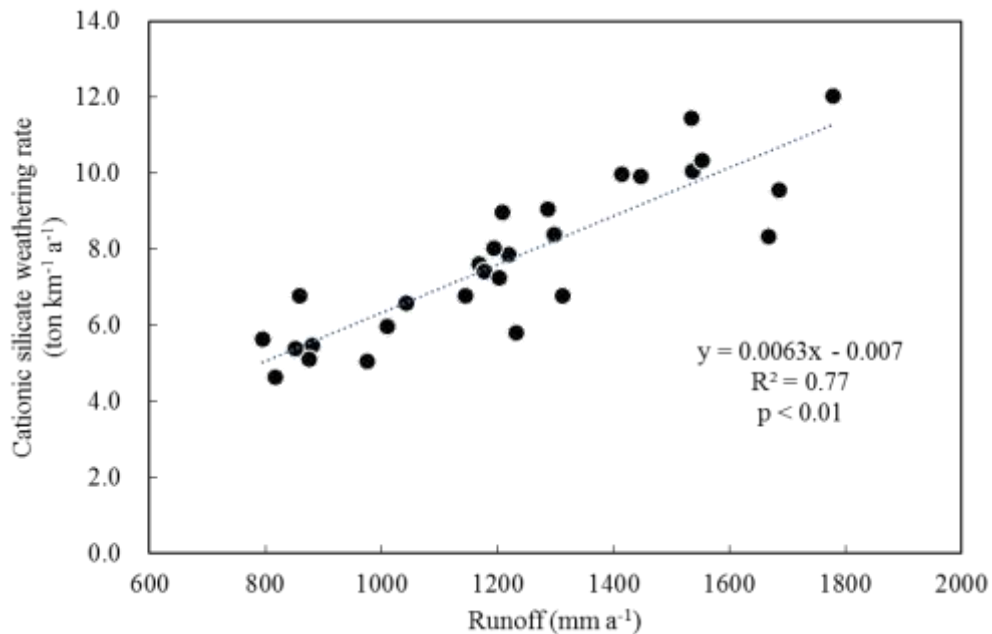

Fig. 5. Plots of the cationic-silicate weathering rate ( $\text{Cat}_{\text{sil}}$ ) vs. runoff for the SECRB, showing that the silicate weathering rates is controlled by the runoff.

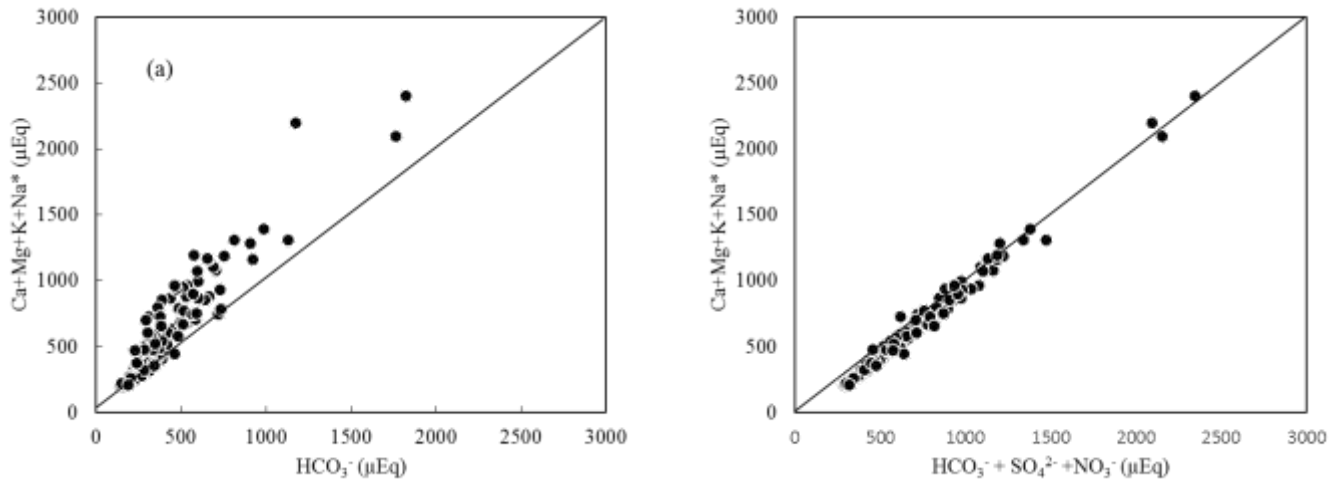

Fig. 6. Plots of total cations derived from carbonate and silicate weathering vs.  $\text{HCO}_3^-$  (a) and  $\text{HCO}_3^- + \text{SO}_4^{2-} + \text{NO}_3^-$  (b) for river waters in the SECRB.

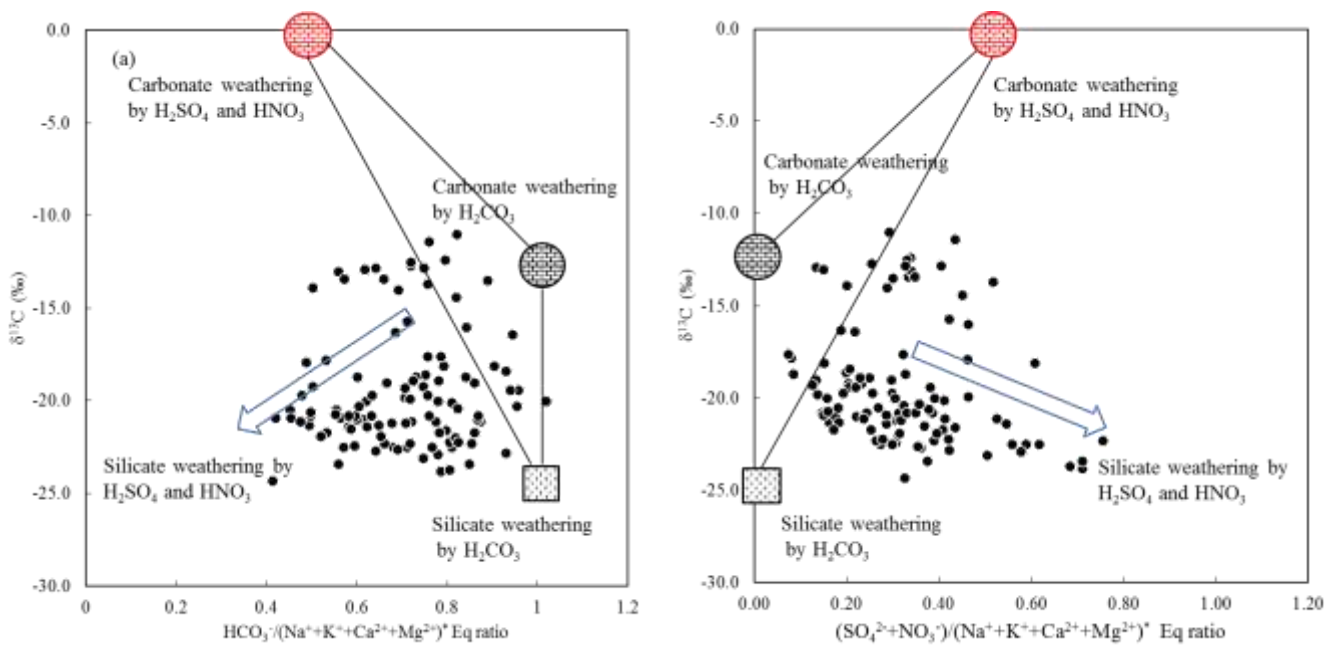

Fig. 7.  $\delta^{13}\text{C}_{\text{DIC}}$  vs.  $\text{HCO}_3^- / (\text{Na}^+ + \text{K}^+ + \text{Ca}^{2+} + \text{Mg}^{2+})^*$  (a) and  $(\text{SO}_4^{2-} + \text{NO}_3^-) / (\text{Na}^+ + \text{K}^+ + \text{Ca}^{2+} + \text{Mg}^{2+})^*$  equivalent ratio (b) in river waters draining the SECRB (\* means corrected for atmospheric and anthropogenic inputs). The plot show that most waters deviate from the three endmember mixing area (carbonate weathering by carbonic acid and sulfuric acid and silicate weathering by carbonic acid), illustrating the effect of sulfuric and nitric acid on silicate weathering.
