# Supplementary material for: Geochemistry of the dissolved loads of rivers in Southeast Coastal Region, China: Anthropogenic impact on chemical weathering and carbon sequestration
Source: Copernicus journal article supplement (doi:10.5194/bg-2018-109), 2018-03-20
Supplement: Supplementary file [file bg-2018-109-AC11-supplement.pdf]

13 **Abstract:**

14 Southeast coastal region is one of the most developed and populated area in  
15 China. Meanwhile, it has been a severe acid rain impacted region for many years. The  
16 chemical compositions and carbon isotope ratio of dissolved inorganic carbon  
17 ( $\delta^{13}\text{C}_{\text{DIC}}$ ) of river waters in high flow season were investigated to evaluate the  
18 chemical weathering and associated atmospheric  $\text{CO}_2$  consumption rates. Mass  
19 balance calculation indicated that the dissolved loads of major rivers in the Southeast  
20 Coastal Rivers Basin (SECRB) were contributed by atmospheric (14.3%, 6.6-23.4%),  
21 anthropogenic (15.7%, 0-41.1%), silicate weathering (39.5%, 17.8-74.0%) and  
22 carbonate weathering inputs (30.6%, 3.9-62.0%). The silicate and carbonate chemical  
23 weathering rates for these river watersheds were  $14.2\text{-}35.8 \text{ t km}^{-2} \text{ a}^{-1}$  and  $1.8\text{-}52.1 \text{ t}$   
24  $\text{km}^{-2} \text{ a}^{-1}$ , respectively. The associated mean  $\text{CO}_2$  consumption rate by silicate  
25 weathering for the whole SECRB were  $191 \times 10^3 \text{ mol km}^{-2} \text{ a}^{-1}$ . The chemical and  
26  $\delta^{13}\text{C}_{\text{DIC}}$  evidences indicated that sulfuric and nitric acid (mainly from acid deposition)  
27 was significantly involved in chemical weathering of rocks. The calculation showed  
28 an overestimation of  $\text{CO}_2$  consumption at  $0.19 \times 10^{12} \text{ g C a}^{-1}$  if sulfuric and nitric acid  
29 was ignored, which accounted for about 33.6% of the total  $\text{CO}_2$  consumption by  
30 silicate weathering in the SECRB. This study quantitatively highlights that the role of  
31 acid deposition in chemical weathering, suggesting that anthropogenic impact should  
32 be seriously considered in estimation of chemical weathering and associated  $\text{CO}_2$   
33 consumption.

34 **Keywords:** Southeast Coastal Rivers Basin; Chemical weathering;  $\text{CO}_2$  consumption;

35 acid deposition;

## 36 **1. Introduction**

37 Chemical weathering of rocks is a key process that links geochemical cycling of  
38 solid earth to the atmosphere and ocean. It provides nutrients to terrestrial and marine  
39 ecosystems and regulates the level of atmospheric CO<sub>2</sub>. As a net sink of atmospheric  
40 CO<sub>2</sub> on geologic timescales, estimation of silicate chemical weathering rates and the  
41 controlling factors are important issues related to long-term global climate change  
42 (e.g. Raymo and Ruddiman, 1992; Négrel et al. 1993; Berner and Caldeira, 1997;  
43 Gaillardet et al., 1999; Kump et al., 2000; Amiotte-Suchet et al., 2003; Oliva et al.,  
44 2003; Hartmann et al., 2009; Moon et al., 2014). As an important component in the  
45 Earth's Critical Zone (U.S. Nat. Res. Council Comm., 2001), river serves as an  
46 integrator of various natural and anthropogenic processes and products in a basin, and  
47 a carrier transporting the weathering products from continent to ocean. Therefore, the  
48 chemical compositions of river are widely used to evaluate chemical weathering and  
49 associated CO<sub>2</sub> consumption rates at catchment and/or continental scale, and examine  
50 their controlling factors (e.g., Edmond et al., 1995; Gislason et al., 1996; Galy and  
51 France-Lanord, 1999; Huh, 2003; Millot et al., 2002, 2003; Oliva et al., 2003; West et  
52 al., 2005; Moon et al., 2007; Noh et al., 2009; Shin et al., 2011; Calmels et al., 2011;  
53 Li, S., et al. 2014).

54 With the intensification of human activities, human perturbations to river basins  
55 have increased in frequency and magnitude (Raymond et al., 2008; Regnier et al.,  
56 2013; Li and Bush, 2015). It is important to understand how such perturbations

57 function on the current weathering systems and to predict how they will affect the  
58 Critical Zone of the future (Brantley and Lebedeva, 2011). In addition to CO<sub>2</sub>, other  
59 sources of acidity (such as sulfuric, nitric and organic acids) can also produce protons.  
60 These protons react with carbonate and silicate minerals, thus enhance rock chemical  
61 weathering rate and flux compared with only considering protons deriving from CO<sub>2</sub>  
62 dissolution (Calmels et al., 2007; Xu and Liu, 2010). The effect of other sourced  
63 proton (especially H<sup>+</sup> induced by SO<sub>2</sub> and NO<sub>x</sub> coming from anthropogenic activities)  
64 on chemical weathering is documented to be an important mechanism modifying  
65 atmospheric CO<sub>2</sub> consumption by rock weathering (Galy and France-Lanord, 1999;  
66 Semhi, et al., 2000; Spence and Telmer, 2005; Xu and Liu, 2007; Perrin et al., 2008;  
67 Gandois et al., 2011). Anthropogenic emissions of SO<sub>2</sub> was projected to provide 3 to 5  
68 times greater H<sub>2</sub>SO<sub>4</sub> to the continental surface than the pyrite oxidation originated  
69 H<sub>2</sub>SO<sub>4</sub> (Lerman et al., 2007). Therefore, increasing acid precipitation due to intense  
70 human activities nowadays could make this mechanism more prominently.

71       The role of acid precipitation on the chemical weathering and CO<sub>2</sub> consumption  
72 has been investigated in some river catchments (Amiotte-Suchet et al., 1995; Probst et  
73 al., 2000; Vries et al., 2003; Lerman et al., 2007; Xu and Liu, 2010). It has been  
74 documented that silicate rocks were more easily disturbed by acid precipitation during  
75 their weathering and soil leaching processes, because of their low buffering capacity  
76 (Reuss et al., 1987; Amiotte-Suchet et al., 1995). The disturbance could be intensive  
77 and cause a decrease of CO<sub>2</sub> consumption about 73% by weathering due to acid  
78 precipitation in the Strengbach catchment (Vosges Mountains, France), where is

79 dominated by crystalline rocks (Amiotte-Suchet et al., 1995). This highlights the  
80 importance of exploring anthropogenic impact on chemical weathering and CO<sub>2</sub>  
81 consumption under different background (e.g. lithology, climate, human activity  
82 intensity, and basin scale) for better constraining and estimation of acid precipitation  
83 effect on rock weathering. Asia, especially East Asia, is one of the world's major  
84 sulfur and nitrogen emissions areas. However, the effect of acid precipitation on  
85 silicate weathering and associated CO<sub>2</sub> consumption was not well evaluated in this  
86 area, especially lack of quantitative studies.

87 Acid precipitation affected about 30% of the territory of China (Fig. 1), and the  
88 seriously areas are mainly located in the east, the south and the center of China, where  
89 over 70% of cities were suffering from acid rain (Zhang et al., 2007a; State  
90 Environmental Protection Administration of China, 2009). Southeast coastal region of  
91 China is one of the most developed and populated areas of this country, dominated by  
92 Mesozoic magmatic rocks (mainly granite and volcanic rocks) in lithology.  
93 Meanwhile, the southeast coastal area has become one of the three major acid rain  
94 areas in China since the beginning of the 1990s (Larssen et al., 1999). It is seriously  
95 impacted by acid rain, with a volume-weighted mean value of pH lower than 4.5 for  
96 many years (Wang et al., 2000; Larssen and Carmichael, 2000; Zhao, 2004; Han et al.,  
97 2006; Larssen et al., 2006; Zhang et al., 2007a; Huang et al., 2008; Xu et al., 2011).  
98 Therefore, it is an ideal area for evaluating silicate weathering and the effect of acid  
99 rain. In the previous work, we have recognized and discussed the importance of  
100 sulfuric acid on the rock weathering and associated CO<sub>2</sub> consumption in the Qiantang

101 river basin in this area (Liu et al., 2016). However, it is difficult to infer the  
102 anthropogenic impact on chemical weathering and CO<sub>2</sub> consumption in the whole  
103 southeast coastal area from the case study of the single river basin, because of the  
104 variations on lithology, basin scale, runoff and anthropogenic background in the large  
105 acid deposition affected area. In this study, the chemical and carbon isotope  
106 composition of rivers in this area were first systematically investigated, in order to: (i)  
107 decipher the different sources of solutes and to quantify their contributions to the  
108 dissolved loads; (ii) calculate silicate weathering and associated CO<sub>2</sub> consumption  
109 rates; (iii) evaluate the effects of acid deposition on rock weathering and CO<sub>2</sub>  
110 consumption flux in the whole southeast coastal rivers basin.

## 111 **2. Natural setting of study area**

112 Southeast coastal region of China, where the landscape is dominated by  
113 mountainous and hilly terrain, lacks the conditions for developing large rivers. The  
114 rivers in this region are dominantly small and medium-sized due to the topographic  
115 limitation. Only 5 rivers in this region have length over 200 km and the drainage area  
116 over 10,000 km<sup>2</sup>, and they are in turn from north to south: the Qiantangjiang  
117 (Qiantang) and the Oujiang (Ou) in Zhejiang province, the Minjiang (Min) and the  
118 Jiulongjiang (Jiulong) in Fujian province and the Hanjiang (Han) in Guangdong  
119 province (Fig. 1). Rivers in this region generally flow eastward or southward and  
120 finally inject into the East China Sea or the South China Sea (Fig. 1), and they are  
121 collectively named as ‘Southeast Coastal Rivers’ (SECRs).

122 The Southeast Coastal Rivers Basin (SECRB) belongs to the warm and humid

123 subtropical oceanic monsoon climate. The mean annual temperature and precipitation  
124 are 17-21°C and 1400-2000 mm, respectively. The precipitation mainly happens  
125 during May to September, and the minimum and maximum temperature often occurs  
126 in January and July. This area is one of the most developed areas in China, with a  
127 population more than 190 million (mean density of ~470 individuals/km<sup>2</sup>), but the  
128 population mainly concentrated in the coastal urban areas. The vegetation coverage of  
129 these river basins is more than 60%, mainly subtropical evergreen-deciduous  
130 broadleaf forest and mostly distributing in mountains area. Cultivated land, and  
131 industries and cities are mainly located in the plain areas and lower reach of these  
132 rivers.

133 Geologically, three regional-scale fault zones are distributed across the SECRB  
134 region (Fig. 1). They are the sub-EW-trending Shaoxing-Jiangshan fault zone, the  
135 NE-trending Zhenghe-Dapu fault zone, and the NE-trending Changle-Nanao fault  
136 zone (Shu et al., 2009). These fault zones dominate the direction of the mountains  
137 ridgelines and drainages, as well as the formation of the basins and bay. The Zhenghe-  
138 Dapu fault zone is a boundary line of Caledonian uplift belt and Hercynian-Indosinian  
139 depression zone. Mesozoic magmatic rocks are widespread in the southeast coastal  
140 region with a total outcrop area at about 240,000 km<sup>2</sup>. Over 90% of the Mesozoic  
141 magmatic rocks are granitoids (granites and rhyolites) and their volcanic counterpart  
142 with minor existence of basalts (Zhou et al., 2000, 2006; Bai et al., 2014). These crust-  
143 derived granitic rocks are mainly formed in the Yanshanian stage, and may have been  
144 related to multiple collision events between Cathaysia and Yangtze blocks and Pacific

145 plate (Zhou and Li, 2000; Xu et al., 2016). Among the major river basins, the  
146 proportions of magmatic rocks outcrop are about 36% in the Qiantang catchment,  
147 over 80% in the Ou, the Jiaoxi and the Jin catchments, and around 60% in the Min,  
148 the Jiulong, the Han and the Rong catchments (Shi, 2014). The overlying Quaternary  
149 sediment in this area is composed of brown-yellow siltstones but is rarely developed.  
150 The oldest basement complex is composed of metamorphic rocks of greenschist and  
151 amphibolite facies. Sedimentary rocks categories into two types, one is mainly  
152 composed by red clastic rocks which cover more than 40,000 km<sup>2</sup> in the area; the  
153 other occurs as interlayers within volcanic formations, including varicolored  
154 mudstones and sandstones. They are mainly distributed on the west of Zhenghe-Dapu  
155 fault zone (FJBGRM, 1985; ZJBGMR, 1989; Shu et al., 2009).

### 156 **3. Sampling and analytical method**

157 A total of 121 water samples were collected from mainstream and tributaries of  
158 the major rivers in the SECRB from July 8th to 31 of 2010 in the high-flow period  
159 (sample number and locations are shown in Fig. 1). For the river low reach samples,  
160 the sampling sites were selected as far as possible from the tidal impacted area and the  
161 sampling were conducted during low tide period (based on the daily tidal time,  
162 <http://ocean.cnss.com.cn/>) in the sampling day. Besides, the salinity of the waters  
163 were checked by salinometer (WS202, China) before sampling in the field. In  
164 addition, water chemistry data were double checked to make sure that the river  
165 samples were not contaminated by seawater. 2-L water samples were collected in the  
166 middle channel of the river from bridges or ferries, or directly from the center of some



167 shallow streams in the source area. The lower reaches sampling sites were selected  
168 distant away from the estuary to avoid the influence of seawater. Temperature (T), pH  
169 and electrical conductivity (EC) were measured in the field with a portable EC/pH  
170 meter (YSI-6920, USA). All of the water samples for chemical analysis were filtered  
171 in field through 0.22  $\mu\text{m}$  Millipore membrane filter, and the first portion of the  
172 filtration was discarded to wash the membrane and filter. One portion filtrate were  
173 stored directly in HDPE bottles for anion analysis and another were acidified to  $\text{pH} <$   
174 2 with 6 M double sub-boiling distilled  $\text{HNO}_3$  for cation analysis. All containers were  
175 previously washed with high-purity HCl and rinsed with Milli-Q 18.2  $\text{M}\Omega$  water.

176 Alkalinity was determined by phenolphthalein and methyl orange end point titration with  
177 dilute HCl within 12 h after sampling. The HCl consumption volumes for phenolphthalein  
178 and methyl orange end point titration were used to calculate the  $\text{HCO}_3^-$ . Cations ( $\text{Na}^+$ ,  $\text{K}^+$ ,  
179  $\text{Ca}^{2+}$  and  $\text{Mg}^{2+}$ ) were determined using Inductively Coupled Plasma Atomic Emission  
180 Spectrometer (ICP-AES) (IRIS Intrepid II XSP, USA). Anions ( $\text{Cl}^-$ ,  $\text{F}^-$ ,  $\text{NO}_3^-$  and  
181  $\text{SO}_4^{2-}$ ) were analyzed by ionic chromatography (IC) (Dionex Corporation, USA).  
182 Dissolved silica was determined by spectrophotometry using the molybdate blue  
183 method. Reagent and procedural blanks were measured in parallel to the sample  
184 treatment, and calibration curve was evaluated by quality control standards before,  
185 during and after the analyses of each batch of samples. Measurement reproducibility  
186 was determined by duplicated sample and standards, which showed  $\pm 3\%$  precision for  
187 the cations and  $\pm 5\%$  for the anions.

188 River water samples for carbon isotopic ratio ( $\delta^{13}\text{C}$ ) of dissolved inorganic

189 carbon (DIC) measurements were collected in 150 ml glass bottles with air-tight caps  
190 and preserved with HgCl<sub>2</sub> to prevent biological activity. The samples were kept  
191 refrigerated until analysis. For the δ<sup>13</sup>C measurements, the filtered samples were  
192 injected into glass bottles with phosphoric acid. The CO<sub>2</sub> was then extracted and  
193 cryogenically purified using a high vacuum line. δ<sup>13</sup>C isotopic ratios were analyzed on  
194 Finnigen MAT-252 stable isotope mass spectrometer at the State Key Laboratory of  
195 Environmental Geochemistry, Chinese Academy of Sciences. The results are  
196 expressed with reference to VPDB, as follows:

$$197 \quad \delta^{13}\text{C} = [((^{13}\text{C}/^{12}\text{C})_{\text{sample}} / (^{13}\text{C}/^{12}\text{C})_{\text{standard}}) - 1] \times 1000 \quad (1)$$

198 The δ<sup>13</sup>C measurement has an overall precision of 0.1‰. A number of duplicate  
199 samples were measured and the results show that the differences were less than the  
200 range of measurement accuracy.

#### 201 **4. Results**

202 The major parameter and ion concentrations of samples are given in Table 1. The  
203 pH values of water samples ranged from 6.50 to 8.24, with an average of 7.23. Total  
204 dissolved solids (TDS) of water samples varied from 35.3 to 205 mg l<sup>-1</sup>, with an  
205 average of 75.2 mg l<sup>-1</sup>. Compared with the major rivers in China, the average TDS  
206 was significantly lower than the Changjiang (224 mg l<sup>-1</sup>, Chetelat et al., 2008), the  
207 Huanghe (557 mg l<sup>-1</sup>, Fan et al., 2014) and the Zhujiang (190 mg l<sup>-1</sup>, Zhang et al.,  
208 2007b). However, the average TDS was comparable to the rivers draining silicate rock  
209 dominated areas, e.g. the upper Ganjiang in Ganzhou, south China (63 mg l<sup>-1</sup>, Ji and  
210 Jiang, 2012), the Amur in north China (70 mg l<sup>-1</sup>, Moon et al., 2009), the Xishui in

211 Hubei, central China ( $101 \text{ mg l}^{-1}$ , Wu et al., 2013), and north Han river in South Korea  
212 ( $75.5 \text{ mg l}^{-1}$ , Ryu et al., 2008). Among the major rivers in the SECRB, the Qiantang  
213 had the highest TDS value (averaging at  $121 \text{ mg l}^{-1}$ ), and the Ou had the lowest TDS  
214 value (averaging at  $48.8 \text{ mg l}^{-1}$ ).

215 Major ion compositions are shown in the cation and anion ternary diagrams (Fig.  
216 2a and b). In comparison with rivers (e.g. the Wujiang and Xijiang) draining  
217 carbonate rocks dominated area (Han and Liu, 2004; Xu and Liu, 2010), these rivers  
218 in the SECRB had distinctly higher proportions of  $\text{Na}^+$ ,  $\text{K}^+$ , and dissolved  $\text{SiO}_2$ . As  
219 shown in the Fig. 2, most samples had high  $\text{Na}^+$  and  $\text{K}^+$  proportions, with an average  
220 more than 50% (in  $\mu\text{mol l}^{-1}$ ) of the total cations, except for samples from the  
221 Qiantang. The concentrations of  $\text{Na}^+$  and  $\text{K}^+$  ranged from  $43.5$  to  $555 \mu\text{mol l}^{-1}$  and  
222  $42.9$  to  $233 \mu\text{mol l}^{-1}$ , with average values of  $152$  and  $98 \mu\text{mol l}^{-1}$ , respectively. The  
223 concentrations of dissolved  $\text{SiO}_2$  ranged from  $98.5$  to  $370 \mu\text{mol l}^{-1}$ , with an average of  
224  $212 \mu\text{mol l}^{-1}$ .  $\text{Ca}^{2+}$  and  $\text{Mg}^{2+}$  accounted for about 38% and 11.6% of the total cation  
225 concentrations.  $\text{HCO}_3^-$  was the dominant anion with concentrations ranging from  $139$   
226 to  $1822 \mu\text{mol l}^{-1}$ . On average, it comprised 60.6% (36-84.6%) of total anions on a  
227 molar basis, followed by  $\text{SO}_4^{2-}$  (14.6%),  $\text{Cl}^-$  (13.1%) and  $\text{NO}_3^-$  (11.8%). The major  
228 ionic compositions indicate that water chemistry of these rivers in the SECRB is  
229 controlled by silicate weathering. Meanwhile, it is also influenced by carbonate  
230 weathering, especially in the Qiantang catchment.

231 The  $\delta^{13}\text{C}$  of dissolved inorganic carbon in the rivers of the SECRB are also given  
232 in Table 1. The  $\delta^{13}\text{C}$  of the water samples showed a wide range, from -11.0‰ to -

233 24.3‰ (average -19.4‰), and with a majority of samples falling between -15 and -  
234 23‰. The values are similar to rivers draining Deccan Traps (Das et al., 2005).

## 235 **5. Discussion**

236 The dissolved solids in river water are commonly from atmospheric and  
237 anthropogenic inputs and weathering of rocks within the drainage basin. It is  
238 necessary to quantify the contribution of different sources to the dissolved loads  
239 before deriving chemical weathering rates and associated CO<sub>2</sub> consumption.

### 240 *5.1 Atmospheric and anthropogenic inputs*

241 To evaluate atmospheric inputs to river waters, chloride is the most common  
242 used reference. Generally, water samples that have the lowest Cl<sup>-</sup> concentrations are  
243 employed to correct the proportion of atmospheric inputs in a river system (Négrel et  
244 al., 1993; Gaillardet et al., 1997; Viers et al., 2001; Xu and Liu, 2007). In pristine  
245 areas, the concentration of Cl<sup>-</sup> in river water is assumed to be entirely derived from  
246 the atmosphere, provided that the contribution of evaporites is negligible (e.g. Stallard  
247 and Edmond, 1981; Négrel et al., 1993). In the SECRB, the lowest Cl<sup>-</sup> concentration  
248 was mainly found in the headwater of each river. According to the geologic setting, no  
249 salt-bearing rocks was found in these headwater area (FJBGRM, 1985; ZJBGMR,  
250 1989). In addition, these areas are mainly mountainous and sparsely populated.  
251 Therefore, we assumed that the lowest Cl<sup>-</sup> concentration of samples from the  
252 headwater of each major river came entirely from atmosphere.

253 The proportion of atmosphere-derived ions in the river waters can then be  
254 calculated by using the element/Cl ratios of the rain. Chemical compositions of rain in

255 the studied area have been reported at different sites, including Hangzhou, Jinhua,  
256 Nanping, Fuzhou and Xiamen (Zhao, 2004; Zhang et al., 2007a; Huang et al., 2008;  
257 Cheng et al., 2011; Xu et al., 2011) (Fig. 1). The volume-weighted mean  
258 concentration of ions and Cl-normalized molar ratios are compiled in Table 2.  
259 According to this procedure, 6.6-23.4% (averaging 14.3%) of total dissolved cations  
260 in the major rivers of the SECRB originated from rain. Among the anions,  $\text{SO}_4^{2-}$  and  
261  $\text{NO}_3^-$  in the rivers are mainly from the atmospheric input, averaging at 73.2% for  
262  $\text{SO}_4^{2-}$  and 75.8% for  $\text{NO}_3^-$ , respectively.

263 As one of the most developed and populated areas in China, the chemistry of  
264 river waters in the SECRB could be significantly impacted by anthropogenic inputs.  
265  $\text{Cl}^-$ ,  $\text{NO}_3^-$  and  $\text{SO}_4^{2-}$  are commonly associated with anthropogenic sources and have  
266 been used as tracers of anthropogenic inputs in watershed. High concentrations of  $\text{Cl}^-$ ,  
267  $\text{NO}_3^-$  and  $\text{SO}_4^{2-}$  can be found at the lower reaches of rivers in the SECRB, and an  
268 obvious increase after flowing through plain areas and cities. This tendency indicates  
269 that river water chemistry is affected by anthropogenic inputs while passing through  
270 the catchments. After correcting for the atmospheric contribution to river waters, the  
271 following assumption is needed to quantitatively estimate the contributions of  
272 anthropogenic inputs. That is,  $\text{Cl}^-$  originates from only atmospheric and anthropogenic  
273 inputs, the excess of atmospheric  $\text{Cl}^-$  is regarded to present anthropogenic inputs and  
274 balanced by  $\text{Na}^+$ .

## 275 *5.2 Chemical weathering inputs*

276 Water samples were displayed on a plot of Na-normalized molar ratios (Fig. 3).

277 The values of the world's large rivers (Gaillardet et al. 1999) are also shown in the  
278 figure. A best correlations between elemental ratios were observed for  $\text{Ca}^{2+}/\text{Na}^+$  vs.  
279  $\text{Mg}^{2+}/\text{Na}^+$  ( $R^2 = 0.95$ ,  $n = 120$ ) and  $\text{Ca}^{2+}/\text{Na}^+$  vs.  $\text{HCO}_3^-/\text{Na}^+$  ( $R^2 = 0.98$ ,  $n = 120$ ). The  
280 samples cluster on a mixing line mainly between silicate and carbonate end-members,  
281 closer to the silicate end-member, and with little evaporite contribution. This  
282 corresponds with the distribution of rock types in the SECRB. In addition, all water  
283 samples have equivalent ratios of  $(\text{Na}^+ + \text{K}^+)/\text{Cl}^-$  larger than one, indicating silicate  
284 weathering as the source of  $\text{Na}^+$  and  $\text{K}^+$  rather than chloride evaporites dissolution.

285 The geochemical characteristics of the silicate and carbonate end-members can  
286 be deduced from the correlations between elemental ratios and referred to literature  
287 data for catchments with well-constrained lithology. After correction for atmospheric  
288 inputs, the  $\text{Ca}^{2+}/\text{Na}^+$ ,  $\text{Mg}^{2+}/\text{Na}^+$  and  $\text{HCO}_3^-/\text{Na}^+$  of the river samples ranged from 0.31  
289 to 30, 0.16 to 6.7, and 1.1 to 64.2, respectively. According to the geological setting  
290 (Fig. 1), there are some small rivers draining purely silicate areas in the SECRs  
291 drainage basins. Based on the elemental ratios of these rivers, we assigned the silicate  
292 end-member for this study as  $\text{Ca}^{2+}/\text{Na}^+ = 0.41 \pm 0.10$ ,  $\text{Mg}^{2+}/\text{Na}^+ = 0.20 \pm 0.03$  and  $\text{HCO}_3^-$   
293  $/\text{Na}^+ = 1.7 \pm 0.6$ . The ratio of  $(\text{Ca}^{2+} + \text{Mg}^{2+})/\text{Na}^+$  for silicate end-member was  $0.61 \pm 0.13$ ,  
294 which is close to the silicate end-member of world rivers ( $(\text{Ca}^{2+} + \text{Mg}^{2+})/\text{Na}^+ =$   
295  $0.59 \pm 0.17$ , Gaillardet et al., 1999). Moreover, previous researches have documented  
296 the chemical composition of rivers, such as the Amur and the Songhuajiang in North  
297 China, the Xishui in the lower reaches of the Changjiang, and major rivers in South  
298 Korea (Moon et al., 2009; Liu et al., 2013; Wu et al., 2013; Ryu et al., 2008; Shin et

299 al., 2011). These river basins has similar lithological setting with the study area, we  
300 could further validate the composition of silicate end-member with their results.  
301  $\text{Ca}^{2+}/\text{Na}^{+}$  and  $\text{Mg}^{2+}/\text{Na}^{+}$  ratios of silicate end-member were reported for the Amur  
302 (0.36 and 0.22), the Songhuajiang ( $0.44\pm 0.23$  and 0.16), the Xishui ( $0.6\pm 0.4$  and  
303  $0.32\pm 0.18$ ), the Han (0.55 and 0.21) and six major rivers in South Korea (0.48 and  
304 0.20) in the studies above, well bracketing our estimation for silicate end-member.

305 Whereas, some samples show high concentrations of  $\text{Ca}^{2+}$ ,  $\text{Mg}^{2+}$  and  $\text{HCO}_3^-$ ,  
306 indicating the contribution of carbonate weathering. The samples collected in the  
307 upper reaches (Sample 12 and 13) of the Qiantang fall close to the carbonate end-  
308 member documented for world's large rivers (Gaillardet et al., 1999). In the present  
309 study,  $\text{Ca}^{2+}/\text{Na}^{+}$  ratio of  $0.41\pm 0.10$  and  $\text{Mg}^{2+}/\text{Na}^{+}$  ratio of  $0.20\pm 0.03$  for silicate end-  
310 member are used to calculate the contribution of  $\text{Ca}^{2+}$  and  $\text{Mg}^{2+}$  from silicate  
311 weathering. Finally, residual  $\text{Ca}^{2+}$  and  $\text{Mg}^{2+}$  are apportioned to carbonate weathering.

### 312 *5.3 Chemical weathering rate in the SECRBs*

313 Based on the above assumption, a forward model is employed to quantify the  
314 relative contribution of the different sources to the rivers of the SECRB in this study.  
315 (e.g. Galy and France-Lanord, 1999; Moon et al., 2007; Xu and Liu, 2007; 2010; Liu  
316 et al., 2013). The calculated contributions of different reservoir to the total cationic  
317 loads for major rivers and their main tributaries in the SECRB are presented in Fig. 4.  
318 On average, the dissolved cationic loads of the rivers in the study area originate  
319 dominantly from silicate weathering, which accounts for 39.5% (17.8-74.0%) of the  
320 total cationic loads in molar unit. Carbonate weathering and anthropogenic inputs

321 account for 30.6% (3.9-62.0%) and 15.7% (0-41.1%), respectively. Contributions  
322 from silicate weathering are high in the Ou (55.6%), the Huotong (54.5%), the Ao  
323 (48.3%) and the Min (48.3%) river catchments, which dominated by granitic and  
324 volcanic bedrocks. In contrast, high contribution from carbonate weathering is  
325 observed in the Qiantang (54.0%), the Jin (52.2%) and the Jiulong (44.8%) river  
326 catchments. The results manifest the lithology control on river solutes of drainage  
327 basin.

328 The chemical weathering rate of rocks is estimated by the mass budget, basin  
329 area and annual discharge (data from the Annual Hydrological Report P. R. China,  
330 2010, Table 3), expressed in  $\text{ton km}^{-2} \text{ a}^{-1}$ . The silicate weathering rate (SWR) is  
331 calculated using major cationic concentrations from silicate weathering and assuming  
332 that all dissolved  $\text{SiO}_2$  is derived from silicate weathering (Xu and Liu, 2010), as the  
333 equation below:

$$334 \quad \text{SWR} = ([\text{Na}]_{\text{sil}} + [\text{K}]_{\text{sil}} + [\text{Ca}]_{\text{sil}} + [\text{Mg}]_{\text{sil}} + [\text{SiO}_2]_{\text{riv}}) \times \text{discharge/area} \quad (2)$$

335 The assumption about Si could lead to overestimation of the silicate weathering  
336 rate, as part of silica may come from dissolution of biogenic sources rather than the  
337 weathering of silicate minerals (Millot et al., 2003; Shin et al., 2011). Thus, the  
338 cationic silicate weathering rates ( $\text{Cat}_{\text{sil}}$ ) were also calculated.

339 The carbonate weathering rate (CWR) is calculated based on the sum of  $\text{Ca}^{2+}$ ,  
340  $\text{Mg}^{2+}$  and  $\text{HCO}_3^-$  from carbonate weathering, with half of the  $\text{HCO}_3^-$  coming from  
341 carbonate weathering being derived from the atmosphere  $\text{CO}_2$ , as the equation below:

$$342 \quad \text{CWR} = ([\text{Ca}]_{\text{carb}} + [\text{Mg}]_{\text{carb}} + 1/2[\text{HCO}_3]_{\text{carb}}) \times \text{discharge/area} \quad (3)$$



343 The chemical weathering rate and flux are calculated for major rivers and their  
344 main tributaries in the SECRB, and the results are shown in Table 3. Silicate and  
345 carbonate weathering fluxes of these rivers (SWF and CWF) range from  $0.02 \times 10^6 \text{ t a}^{-1}$   
346  $^1$  to  $1.80 \times 10^6 \text{ t a}^{-1}$ , and from  $0.004 \times 10^6 \text{ t a}^{-1}$  to  $1.74 \times 10^6 \text{ t a}^{-1}$ , respectively. Among the  
347 rivers, the Min has the highest silicate weathering flux, and the Qiantang has the  
348 highest carbonate weathering flux. On the whole SECRB scale,  $3.95 \times 10^6 \text{ t a}^{-1}$  and  
349  $4.09 \times 10^6 \text{ t a}^{-1}$  of dissolved solids originating from silicate and carbonate weathering,  
350 respectively, are transported into the East and South China Sea by rivers in this  
351 region. Compared with the largest three river basins (the Changjiang, the Huanghe  
352 and the Xijiang) in China, the flux of silicate weathering calculated for the SECRB is  
353 lower than the Changjiang ( $9.5 \times 10^6 \text{ t a}^{-1}$ , Gaillardet et al. 1999), but higher than the  
354 Huanghe ( $1.52 \times 10^6 \text{ t a}^{-1}$ , Fan et al., 2014) and the Xijiang ( $2.62 \times 10^6 \text{ t a}^{-1}$ , Xu and Liu,  
355 2010).

356 The silicate and carbonate chemical weathering rates for these river watersheds  
357 were  $14.2\text{-}35.8 \text{ t km}^{-2} \text{ a}^{-1}$  and  $1.8\text{-}52.1 \text{ t km}^{-2} \text{ a}^{-1}$ , respectively. The total rock  
358 weathering rate (TWR) for the whole SECRB is  $48.1 \text{ ton km}^{-2} \text{ a}^{-1}$ , higher than the  
359 world average ( $24 \text{ ton km}^{-2} \text{ a}^{-1}$ , Gaillardet et al., 1999). The cationic silicate  
360 weathering rates ( $\text{Cat}_{\text{sil}}$ ) ranges from  $4.7$  to  $12.0 \text{ ton km}^{-2} \text{ a}^{-1}$  for the river watersheds  
361 in the SECRB, averaging at  $7.8 \text{ ton km}^{-2} \text{ a}^{-1}$ . Furthermore, a good linear correlation  
362 ( $R^2 = 0.77$ ,  $n = 28$ ) is observed between the  $\text{Cat}_{\text{sil}}$  and runoff (Fig. 5), indicating  
363 silicate weathering rates is controlled by the runoff as documented in previous  
364 researches (e.g., Bluth and Kump, 1994; Gaillardet et al., 1999; Millot et al., 2002;

365 Oliva et al., 2003; Wu et al., 2013; Pepin et al., 2013).

#### 366 *5.4 CO<sub>2</sub> consumption and the role of sulfuric acid*

367 To calculate atmospheric CO<sub>2</sub> consumption by silicate weathering (CSW) and by  
368 carbonate weathering (CCW), a charge-balanced state between rock chemical  
369 weathering-derived alkalinity and cations was assumed (Roy et al., 1999).

$$370 \quad [\text{CO}_2]_{\text{CSW}} = [\text{HCO}_3]_{\text{CSW}} = [\text{Na}]_{\text{sil}} + [\text{K}]_{\text{sil}} + 2[\text{Ca}]_{\text{sil}} + 2[\text{Mg}]_{\text{sil}} \quad (4)$$

$$371 \quad [\text{CO}_2]_{\text{CCW}} = [\text{HCO}_3]_{\text{CCW}} = [\text{Ca}]_{\text{carb}} + [\text{Mg}]_{\text{carb}} \quad (5)$$

372 The calculated CO<sub>2</sub> consumption rates by chemical weathering for the rivers in  
373 SECRB are shown in Table 3. CO<sub>2</sub> consumption rates by carbonate and silicate  
374 weathering are from 17.9 to 530×10<sup>3</sup> mol km<sup>-2</sup> a<sup>-1</sup> (averaging at 206×10<sup>3</sup> mol km<sup>-2</sup> a<sup>-1</sup>)  
375 and from 167 to 460×10<sup>3</sup> mol km<sup>-2</sup> a<sup>-1</sup> (averaging at 281×10<sup>3</sup> mol km<sup>-2</sup> a<sup>-1</sup>) for major  
376 river catchments in the SECRB. The CO<sub>2</sub> consumption rates by silicate weathering in  
377 the SECRB are higher than that of major rivers in the world and China, such as the  
378 Amazon (174×10<sup>3</sup> mol km<sup>-2</sup> a<sup>-1</sup>, Mortatti and Probst, 2003), the Mississippi and the  
379 Mackenzie (66.8 and 34.1×10<sup>3</sup> mol km<sup>-2</sup> a<sup>-1</sup>, Gaillardet et al., 1999), the Changjiang  
380 (112×10<sup>3</sup> mol km<sup>-2</sup> a<sup>-1</sup>, Chetelat et al., 2008), the Huanghe (35×10<sup>3</sup> mol km<sup>-2</sup> a<sup>-1</sup>, Fan  
381 et al., 2014), the Xijiang (154×10<sup>3</sup> mol km<sup>-2</sup> a<sup>-1</sup>, Xu and Liu, 2010), the  
382 Longchuanjiang (173×10<sup>3</sup> mol km<sup>-2</sup> a<sup>-1</sup>, Li et al., 2011) and the Mekong (191×10<sup>3</sup> mol  
383 km<sup>-2</sup> a<sup>-1</sup>, Li et al., 2014) and three large rivers in eastern Tibet (103-121×10<sup>3</sup> mol km<sup>-2</sup>  
384 a<sup>-1</sup>, Noh et al., 2009), the Hanjiang in central China (120×10<sup>3</sup> mol km<sup>-2</sup> a<sup>-1</sup>, Li et al.,  
385 2009) and the Sonhuajiang in north China (66.6×10<sup>3</sup> mol km<sup>-2</sup> a<sup>-1</sup>, Liu et al., 2013).  
386 The high CO<sub>2</sub> consumption rates by silicate weathering in the SECRB could be

387 attributed to extensive distribution of silicate rocks, high runoff, humid and hot  
388 climatic conditions. The regional fluxes of CO<sub>2</sub> consumption by silicate and carbonate  
389 weathering is about  $47.9 \times 10^9 \text{ mol a}^{-1}$  ( $0.57 \times 10^{12} \text{ g C a}^{-1}$ ) and  $41.9 \times 10^9 \text{ mol a}^{-1}$   
390 ( $0.50 \times 10^{12} \text{ g C a}^{-1}$ ) in the whole SECRB.

391 However, in addition to CO<sub>2</sub>, the anthropogenic sourced proton (e.g. H<sub>2</sub>SO<sub>4</sub> and  
392 HNO<sub>3</sub>) is well documented as significant proton providers in rock weathering process  
393 (Galy and France-Lanord, 1999; Karim and Veizer, 2000; Yoshimura et al., 2001; Han  
394 and Liu, 2004; Spence and Telmer, 2005; Lerman and Wu, 2006; Xu and Liu 2007;  
395 2010; Perrin et al., 2008; Gandois et al., 2011). Sulfuric acid can be generated by  
396 natural oxidation of pyrite and anthropogenic emissions of SO<sub>2</sub> from coal combustion  
397 and subsequently dissolve carbonate and silicate minerals. The riverine nitrate in a  
398 watershed can be derived from atmospheric deposition, synthetic fertilizers, microbial  
399 nitrification, sewage and manure, etc. (e.g. Kendall 1998). Although it is difficult to  
400 determine the sources of nitrate in river waters, we can at least simply assume that  
401 nitrate from acid deposition is one of the providers of protons. The consumption of  
402 CO<sub>2</sub> by rock weathering would be overestimated if H<sub>2</sub>SO<sub>4</sub> and HNO<sub>3</sub> induced rock  
403 weathering was ignored (Spence and Telmer, 2005; Xu and Liu, 2010; Shin et al.,  
404 2011; Gandois et al., 2011). Thus, the role of the anthropogenic sourced protons on  
405 the chemical weathering is crucial for an accurate estimation of CO<sub>2</sub> consumption by  
406 rock weathering.

407 Rapid economic growth and increased energy demand have result in severe air  
408 pollution problems in China, indicated by the high levels of mineral acids

409 (predominately sulfuric) observed in precipitation (Lassen and Carmichael, 2000; Pan  
410 et al., 2013; Liu et al., 2016). The national SO<sub>2</sub> emissions in 2010 reached to 30.8  
411 Tg/year (Lu et al., 2011). Previous study documented that fossil fuel combustion  
412 accounts for the dominant sulfur deposition (~77%) in China (Liu et al., 2016). The  
413 wet deposition rate of nitrogen peaked over the central and south China, with mean  
414 value of 20.2, 18.2 and 25.8 kg N ha<sup>-1</sup> yr<sup>-1</sup> in Zhejiang, Fujian and Guangdong  
415 province, respectively (Lu and Tian, 2007). Current sulfur and nitrogen depositions in  
416 the Southeast coastal region are still among the highest in China (Fang et al., 2013;  
417 Cui et al., 2014; Liu et al., 2016).

418 The involvement of protons originating from H<sub>2</sub>SO<sub>4</sub> and HNO<sub>3</sub> in the river  
419 waters can be verified by the stoichiometry between cations and anions, shown in Fig.  
420 6. In the rivers of the SECRB, the sum cations released by silicate and carbonate  
421 weathering were not balanced by HCO<sub>3</sub><sup>-</sup> only (Fig. 6a), but were almost balanced by  
422 the sum of HCO<sub>3</sub><sup>-</sup> and SO<sub>4</sub><sup>2-</sup> and NO<sub>3</sub><sup>-</sup> (Fig. 6b). This implies that H<sub>2</sub>CO<sub>3</sub> and H<sub>2</sub>SO<sub>4</sub>  
423 and HNO<sub>3</sub> are the potential erosion agents in chemical weathering in the SECRB. The  
424 δ<sup>13</sup>C values of the water samples showed a wide range, from -11.0‰ to -24.3‰, with  
425 an average of -19.4‰. The δ<sup>13</sup>C from soil is governed by the relative contribution  
426 from C<sub>3</sub> and C<sub>4</sub> plant (Das et al., 2005). The studied areas have subtropical  
427 temperatures and humidity, and thus C<sub>3</sub> processes are dominant. The δ<sup>13</sup>C of soil CO<sub>2</sub>  
428 is derived primarily from δ<sup>13</sup>C of organic material which typically has a value of -24  
429 to -34‰, with an average of -28‰ (Faure, 1986). According to previous studies, the  
430 average value for C<sub>3</sub> trees and shrubs are from -24.4 to -30.5‰, and most of them are

431 lower than -28‰ in south China (Chen et al., 2005; Xiang, 2006; Dou et al., 2013).  
 432 After accounting for the isotopic effect from diffusion of CO<sub>2</sub> from soil, the resulting  
 433 δ<sup>13</sup>C (from the terrestrial C<sub>3</sub> plant process) should be ~ -25‰ (Cerling et al., 1991).  
 434 This mean DIC derived from silicate weathering by carbonic acid (100% from soil  
 435 CO<sub>2</sub>) would yield a δ<sup>13</sup>C value of -25‰. Carbonate rocks are generally derived from  
 436 marine system and, typically, have δ<sup>13</sup>C value close to zero (Das et al., 2005). Thus,  
 437 the theoretical δ<sup>13</sup>C value of DIC derived from carbonate weathering by carbonic acid  
 438 (50% from soil CO<sub>2</sub> and 50% from carbonate rocks) is -12.5‰. DIC derived from  
 439 carbonate weathering by sulfuric acid are all from carbonate rocks, thus the δ<sup>13</sup>C of  
 440 the DIC would be 0‰. Based on these conclusions, sources of riverine DIC from  
 441 different end-members in the SECRB were plotted in Fig. 7. Most water samples drift  
 442 away from the three endmember mixing area (carbonate and silicate weathering by  
 443 carbonic acid and carbonate weathering by sulfuric acid) and towards the silicate  
 444 weathering by sulfuric and nitric acid area, clearly illustrating the effect of the  
 445 anthropogenic sourced protons on silicate weathering in the SECRB.

446 Considering the H<sub>2</sub>SO<sub>4</sub> and HNO<sub>3</sub> effect on chemical weathering, CO<sub>2</sub>  
 447 consumption by silicate weathering can be determined from the equation below  
 448 (Moon et al., 2007; Ryu et al., 2008; Shin et al., 2011):

$$449 \quad [\text{CO}_2]_{\text{SSW}} = [\text{Na}]_{\text{sil}} + [\text{K}]_{\text{sil}} + 2[\text{Ca}]_{\text{sil}} + 2[\text{Mg}]_{\text{sil}} - \gamma \times [2\text{SO}_4 + \text{NO}_3]_{\text{atmos}} \quad (6)$$

450 Where  $\gamma$  is calculated by  $\text{cation}_{\text{sil}} / (\text{cation}_{\text{sil}} + \text{cation}_{\text{carb}})$ .

451 Based on the calculation in section 5.1, SO<sub>4</sub><sup>2-</sup> and NO<sub>3</sub><sup>-</sup> in river waters were  
 452 mainly derived from atmospheric input. Assuming SO<sub>4</sub><sup>2-</sup> and NO<sub>3</sub><sup>-</sup> in river waters

453 derived from atmospheric input (after correction for sea-salt contribution) are all from  
454 acid precipitation, CO<sub>2</sub> consumption rates by silicate weathering (SSW) are estimated  
455 between  $55 \times 10^3 \text{ mol km}^{-2} \text{ a}^{-1}$  and  $286 \times 10^3 \text{ mol km}^{-2} \text{ a}^{-1}$  for major river watersheds in  
456 the SECRB. For the whole SECRB, the actual CO<sub>2</sub> consumption rates by silicate is  
457  $191 \times 10^3 \text{ mol km}^{-2} \text{ a}^{-1}$  when the effect of H<sub>2</sub>SO<sub>4</sub> and HNO<sub>3</sub> is considered. The flux of  
458 CO<sub>2</sub> consumption is overestimated by  $16.1 \times 10^9 \text{ mol a}^{-1}$  ( $0.19 \times 10^{12} \text{ g C a}^{-1}$ ) due to the  
459 involvement of H<sub>2</sub>SO<sub>4</sub> and HNO<sub>3</sub> from acid precipitation, accounting for  
460 approximately 33.6% of total CO<sub>2</sub> consumption flux by silicate weathering in the  
461 SECRB. It highlights the fact that the drawdown of atmospheric CO<sub>2</sub> by silicate  
462 weathering can be significantly overestimated if acid deposition is ignored in long-  
463 term perspectives. The result is important as it quantitatively shows that  
464 anthropogenic activities can significantly affect rock weathering and associated  
465 atmospheric CO<sub>2</sub> consumption. The quantification of this effect needs to be well  
466 evaluated in Asian and global scale within the current and future human activity  
467 background.

468 It is noticeable that the chemical weathering and associated CO<sub>2</sub> consumption  
469 rates for the study area were calculated by the river water geochemistry of high-flow  
470 season. As a subtropical monsoon climate area, the river water of the southeast coastal  
471 rivers is mainly recharged by rain, and the amount of precipitation in high-flow  
472 season accounts for more than 70% of the annual precipitation in the area. The  
473 processes in low-flow season might be different for some extent. It is worth the  
474 further effort to investigate the hydrology and temperature effect on weathering rate

475 and flux, as well as on the anthropogenic impact evaluation in different climate  
476 regime and hydrology season.

## 477 **6. Conclusions**

478 River waters in the southeast coastal region of China are characterized by high  
479 proportions of  $\text{Na}^+$ ,  $\text{K}^+$  and dissolved  $\text{SiO}_2$ , indicating water chemistry of the rivers in  
480 the SECRB is mainly controlled by silicate weathering. The dissolved cationic loads  
481 of the rivers in the study area originate dominantly from silicate weathering, which  
482 accounts for 39.5% (17.8-74.0%) of the total cationic loads. Carbonate weathering,  
483 atmospheric and anthropogenic inputs account for 30.6%, 14.3% and 15.7%,  
484 respectively. Meanwhile, more than 70% of  $\text{SO}_4^{2-}$  and  $\text{NO}_3^-$  in the river waters derived  
485 from atmospheric input. The chemical weathering rate of silicates and carbonates for  
486 the whole SECRB are estimated to be approximately 23.7 and 24.5  $\text{ton km}^{-2} \text{ a}^{-1}$ .  
487 About  $8.04 \times 10^6 \text{ t a}^{-1}$  of dissolved solids originating from rock weathering are  
488 transported into the East and South China Sea by these rivers in the SECRB. With the  
489 assumption that all the protons involved in the weathering reaction are provided by  
490 carbonic acid, the  $\text{CO}_2$  consumption rates by silicate and carbonate weathering are  
491 287 and  $251 \times 10^3 \text{ mol km}^{-2} \text{ a}^{-1}$ , respectively. However, both water chemistry and  
492 carbon isotope data provide evidence that sulfuric and nitric acid from acid  
493 precipitation serves as significant agents during chemical weathering. Considering the  
494 effect of sulfuric and nitric acid, the  $\text{CO}_2$  consumption rate by silicate weathering for  
495 the SECRB are  $191 \times 10^3 \text{ mol km}^{-2} \text{ a}^{-1}$ . Therefore, the  $\text{CO}_2$  consumption flux would be  
496 overestimated by  $16.1 \times 10^9 \text{ mol a}^{-1}$  ( $0.19 \times 10^{12} \text{ g C a}^{-1}$ ) in the SECRB if the effect of

497 sulfuric and nitric acid is ignored. This work illustrates that anthropogenic disturbance  
498 by acid precipitation has profound impact on CO<sub>2</sub> sequestration by rock weathering.

499 **Acknowledgements.** This work was financially supported by the "Strategic Priority  
500 Research Program" of the Chinese Academy of Sciences (Grant No. XDB15010405),  
501 and Natural Science Foundation of China (Grant No. 41673020, 91747202, 41772380  
502 and 41730857).

503 **References:**

504 Amiotte-Suchet, P., Probst, A. Probst, J.-L., Influence of acid rain on CO<sub>2</sub>  
505 consumption by rock weathering: local and global scales. *Water Air Soil Pollut.*  
506 85, 1563-1568, 1995.

507 Amiotte-Suchet, P., Probst, J.-L. Ludwig, W., Worldwide distribution of continental  
508 rock lithology: implications for the atmospheric/soil CO<sub>2</sub> uptake by continental  
509 weathering and alkalinity river transport to the oceans. *Global Biogeochem.*  
510 *Cycles* 17, 1038-1052, 2003.

511 Bai, H., Song, L.S., Xia, W.P., Prospect analysis of hot dry rock (HDR) in Eastern part  
512 of Jiangxi province, *Coal Geol. China* 26, 41-44. (In Chinese), 2014.

513 Berner, R.A., Caldeira, K., The need for mass balance and feedback in the  
514 geochemical carbon cycle. *Geology* 25, 955-956, 1997.

515 Bluth, G.J.S., Kump, L.R., Lithological and climatological controls of river chemistry.  
516 *Geochim. Cosmochim. Acta* 58, 2341-2359, 1994.

517 Brantley, S.L., Lebedeva, M., Learning to read the chemistry of regolith to understand  
518 the Critical Zone. *Annual Review of Earth and Planetary Sciences*, 39: 387-416,



519 2011.

520 Calmels, D., Gaillardet, J., Brenot, A., France-Lanord, C., Sustained sulfide oxidation  
521 by physical erosion processes in the Mackenzie River basin: climatic  
522 perspectives. *Geology* 35, 1003-1006, 2007.

523 Calmels, D., Galy, A., Hovius, N., Bickle, M., West, A.J., Chen, M.-C., Chapman, H.,  
524 Contribution of deep groundwater to the weathering budget in a rapidly eroding  
525 mountain belt, Taiwan. *Earth Planet. Sci. Lett.* 303, 48-58, 2011.

526 Cerling, T.E., Solomon, D.K., Quade, J., Bownman, J.R., On the isotopic composition  
527 of soil CO<sub>2</sub>. *Geochim. Cosmochim. Acta* 55, 3403–3405, 1991.

528 Chen, Q., Shen, C., Sun, Y., Peng, S., Yi, W., Li Z., Jiang, M., Spatial and temporal  
529 distribution of carbon isotopes in soil organic matter at the Dinghushan  
530 Biosphere Reserve, South China. *Plant and Soil*, 273: 115–128, 2005.

531 Cheng, Y., Liu, Y., Huo, M., Sun, Q., Wang, H., Chen, Z., Bai, Y., Chemical  
532 characteristics of precipitation at Nanping Mangdang Mountain in eastern China  
533 during spring. *J. Environ. Sci.* 23, 1350-1358, 2011.

534 Chetelat, B., Liu, C., Zhao, Z., Wang, Q., Li, S., Li, J., Wang, B., Geochemistry of the  
535 dissolved load of the Changjiang Basin rivers: anthropogenic impacts and  
536 chemical weathering. *Geochim. Cosmochim. Acta* 72, 4254-4277, 2008.

537 Cui, J., Zhou, J., Peng, Y., He, Y., Yang, H., Mao, J., Atmospheric wet deposition of  
538 nitrogen and sulfur to a typical red soil agroecosystem in Southeast China  
539 during the ten-year monsoon seasons (2003-2012). *Atmos. Environ.* 82, 121-  
540 129, 2014.

541 Das, A., Krishnaswami, S., Sarin, M.M., Pande, K., Chemical weathering in the  
542 Krishna Basin and Western Ghats of the Deccan Traps, India: Rates of basalt  
543 weathering and their controls. *Geochim. Cosmochim. Acta* 69(8), 2067-2084,  
544 2005.

545 Dou, X., Deng, Q., Li, M., Wang, W., Zhang, Q., Cheng, X., Reforestation of *Pinus*  
546 *massoniana* alters soil organic carbon and nitrogen dynamics in eroded soil in  
547 south China. *Ecological Engineering* 52, 154-160, 2013.

548 Edmond, J.M., Palmer, M.R., Measures, C.I., Grant, B., Stallard, R.F., The fluvial  
549 geochemistry and denudation rate of the Guayana Shield in Venezuela,  
550 Colombia, and Brazil. *Geochim. Cosmochim. Acta* 59, 3301-3325, 1995.

551 Fan, B.L, Zhao, Z.Q., Tao, F.X., Liu, B.J., Tao, Z.H., Gao, S., He, M.Y.,  
552 Characteristics of carbonate, evaporite and silicate weathering in Huanghe River  
553 basin: A comparison among the upstream, midstream and downstream. *J. Asian*  
554 *Earth Sci.* 96, 17-26, 2014.

555 Fang, Y., Wang, X., Zhu, F., Wu, Z., Li, J., Zhong, L., Chen, D., Yoh, M., Three-  
556 decade changes in chemical composition of precipitation in Guangzhou city,  
557 southern China: has precipitation recovered from acidification following  
558 sulphur dioxide emission control? *Tellus B* 65, 1-15, 2013.

559 Faure, G., *Principles of Isotope Geology*. Wiley, Toronto, pp. 492-493, 1986.

560 FJBGMR: Fujian Bureau of Geology and Mineral Resources, *Regional Geology of*  
561 *Fujian Province*. Geol. Publ. House, Beijing, p. 671 (in Chinese with English  
562 abstract), 1985.

563 Gaillardet, J., Dupré, B., Allègre, C.J., Négrel, P., Chemical and physical denudation  
564 in the Amazon River basin. *Chem. Geol.* 142, 141-173, 1997.

565 Gaillardet, J., Dupré, B., Louvat, P., Allegre, C.J., Global silicate weathering and CO<sub>2</sub>  
566 consumption rates deduced from the chemistry of large rivers. *Chem. Geol.* 159,  
567 3-30, 1999.

568 Galy, A., France-Lanord, C., Weathering processes in the Ganges-Brahmaputra basin  
569 and the riverine alkalinity budget. *Chem. Geol.* 159, 31-60, 1999.

570 Gandois, L., Perrin, A.-S., Probst, A., Impact of nitrogenous fertilizer-induced proton  
571 release on cultivated soils with contrasting carbonate contents: A column  
572 experiment. *Geochim. Cosmochim. Acta* 75, 1185-1198, 2011.

573 Gislason, S.R., Arnorsson, S., Armannsson, H., Chemical weathering of basalt in  
574 southwest Iceland: effects of runoff, age of rocks and vegetative/glacial cover.  
575 *Am. J. Sci.* 296, 837-907, 1996.

576 Han, G., Liu, C.Q., Water geochemistry controlled by carbonate dissolution: a study  
577 of the river waters draining karst-dominated terrain, Guizhou Province, China.  
578 *Chem. Geol.* 204, 1-21, 2004.

579 Han, Z.W., Ueda, H., Sakurai, T., Model study on acidifying wet deposition in East  
580 Asia during wintertime. *Atmos. Environ.* 40, 2360-2373, 2006.

581 Hartmann, J., Jansen, N., Dürr, H.H., Kempe, S., Köhler, P., Global CO<sub>2</sub> consumption  
582 by chemical weathering: what is the contribution of highly active weathering  
583 regions? *Global Planet. Change* 69, 185-194, 2009.

584 Huang, K., Zhuang, G., Xu, C., Wang Y., Tang A., The chemistry of the severe acidic

585 precipitation in Shanghai, China. *Atmos. Res.* 89, 149-160, 2008.

586 Huh, Y.S., Chemical weathering and climate - a global experiment: a review. *Geosci.*  
587 *J.* 7, 277-288, 2003.

588 Hydrological data of river basins in Zhejiang, Fujian province and Taiwan region,  
589 Annual Hydrological Report P. R. China, 2010, Vol (7) (in Chinese)

590 Ji, H., Jiang, Y., Carbon flux and C, S isotopic characteristics of river waters from a  
591 karstic and a granitic terrain in the Yangtze River system. *J. Asian Earth Sci.* 57,  
592 38-53, 2012.

593 Karim, A., Veizer, H.E., Weathering processes in the Indus River Basin: implication  
594 from riverine carbon, sulphur, oxygen and strontium isotopes. *Chem. Geol.* 170,  
595 153-177, 2000.

596 Kendall, C., Tracing nitrogen sources and cycling in catchments. In: Kendall, C., &  
597 McDonnell, J.J., (Eds) *Isotope Tracers in Catchment Hydrology*. Elsevier,  
598 Amsterdam, 1998.

599 Kump, L.R., Brantley, S.L., Arthur, M.A., Chemical weathering, atmospheric CO<sub>2</sub> and  
600 climate. *Ann. Rev. Earth Planet. Sci.* 28, 611-667, 2000.

601 Larssen, T., Carmichael, G.R., Acid rain and acidification in China: the importance of  
602 base cation deposition. *Environ. Poll.* 110, 89-102, 2000.

603 Larssen, T., Lydersen, E., Tang, D., He, Y., Gao, J., Liu, H., Duan, L., Seip, H.M.,  
604 Acid rain in China. *Environ. Sci. Technol.* 40, 418-425, 2006.

605 Lerman, A., Wu, L., CO<sub>2</sub> and sulfuric acid controls of weathering and river water  
606 composition. *J. Geochem. Explor.* 88, 427-430, 2006.

607 Lerman, A., Wu, L., Mackenzie, F.T., CO<sub>2</sub> and H<sub>2</sub>SO<sub>4</sub> consumption in weathering and  
608 material transport to the ocean, and their role in the global carbon balance. *Mar.*  
609 *Chem.* 106, 326-350, 2007.

610 Li, S., Bush, R.T., Changing fluxes of carbon and other solutes from the Mekong  
611 River. *Sci. Rep.* 5, 16005, 2015.

612 Li, S.Y., Lu, X.X., Bush, R.T., Chemical weathering and CO<sub>2</sub> consumption in the  
613 Lower Mekong River. *Sci. Total Environ.* 472, 162-177, 2014.

614 Li, S.Y., Lu, X.X., He, M., Zhou, Y., Bei, R., Li, L., Zieglera, A.D., Major element  
615 chemistry in the Upper Yangtze River: a case study of the Longchuanjiang  
616 River. *Geomorphology* 129, 29-42, 2011.

617 Li, S.Y., Xu, Z.F., Wang, H., Wang, J.H., Zhang, Q.F., Geochemistry of the upper Han  
618 River basin, China. 3: anthropogenic inputs and chemical weathering to the  
619 dissolved load. *Chem. Geol.* 264, 89-95, 2009.

620 Liu, B., Liu, C.-Q., Zhang, G., Zhao, Z.-Q., Li, S.-L., Hu, J., Ding, H., Lang, Y.-C.,  
621 Li, X.-D., Chemical weathering under mid- to cool temperate and monsoon-  
622 controlled climate: A study on water geochemistry of the Songhuajiang River  
623 system, northeast China. *Appl. Geochem.* 31, 265-278, 2013.

624 Liu, L., Zhang, X., Wang, S., Zhang, W., Lu, X., Bulk sulfur (S) deposition in China.  
625 *Atmos. Environ.*, 135, 41-49, 2016.

626 Liu, W., Shi, C., Xu, Z., Zhao, T., Jiang, H., Liang, C., Zhang, X., Zhou, Li., Yu, C.,  
627 Water geochemistry of the Qiantangjiang River, East China: Chemical  
628 weathering and CO<sub>2</sub> consumption in a basin affected by severe acid deposition.

629 J.Asian Earth Sci., 127, 246-256, 2016.

630 Lu, C., Tian, H., Spatial and temporal patterns of nitrogen deposition in China:  
631 Synthesis of observational data. J. Geophys. Res. 112, D22S05, 2007.

632 Lu, Z., Zhang, Q., Streets, D.G., Sulfur dioxide and primary carbonaceous aerosol  
633 emissions in China and India, 1996e2010. Atmos. Chem. Phys. 11, 9839-9864,  
634 2011.

635 Millot, R., Gaillardet, J., Dupré, B., Allègre, C.J., Northern latitude chemical  
636 weathering rates: clues from the Mackenzie River Basin, Canada. Geochim.  
637 Cosmochim. Acta 67, 1305-1329, 2003.

638 Millot, R., Gaillardet, J., Dupré, B., Allègre, C.J., The global control of silicate  
639 weathering rates and the coupling with physical erosion: new insights from  
640 rivers of the Canadian Shield. Earth Planet. Sci. Lett. 196, 83-98, 2002.

641 Ministry of Environmental Protection of China, 2009. China Environmental Quality  
642 Report 2008. China Environmental Sciences Press, Beijing. In Chinese.

643 Moon, S., Chamberlain, C.P., Hilley, G.E., New estimates of silicate weathering rates  
644 and their uncertainties in global rivers. Geochim. Cosmochim. Acta 134, 257-  
645 274, 2014.

646 Moon, S., Huh, Y., Qin, J., van Pho, N., Chemical weathering in the Hong (Red) River  
647 basin: Rates of silicate weathering and their controlling factors. Geochim.  
648 Cosmochim. Acta 71, 1411-1430, 2007.

649 Moon, S., Huh, Y., Zaitsev, A., Hydrochemistry of the Amur River: Weathering in a  
650 Northern Temperate Basin. Aquat. Geochem., 15, 497-527, 2009.

651 Mortatti, J., Probst, J.L., Silicate rock weathering and atmospheric/soil CO<sub>2</sub> uptake in  
652 the Amazon basin estimated from river water geochemistry: seasonal and spatial  
653 variations. *Chem. Geol.* 197, 177-196, 2003.

654 Négrel, P., Allègre, C.J., Dupré, B., Lewin, E., Erosion sources determined by  
655 inversion of major and trace element ratios and strontium isotopic ratios in river  
656 water: the Congo Basin Case. *Earth Planet. Sci. Lett.* 120, 59-76, 1993.

657 Noh, H., Huh, Y., Qin, J., Ellis, A., Chemical weathering in the Three Rivers region of  
658 Eastern Tibet. *Geochim. Cosmochim. Acta* 73, 1857-1877, 2009.

659 Oliva, P., Viers, J., Dupré B., Chemical weathering in granitic environments. *Chem.*  
660 *Geol.* 202, 225-256, 2003.

661 Pan, Y., Wang, Y., Tang, G., Wu, D., Spatial distribution and temporal variations of  
662 atmospheric sulfur deposition in Northern China: insights into the potential  
663 acidification risks. *Atmos. Chem. Phys.* 13, 1675-1688, 2013.

664 Pepin, E., Guyot, J.L., Armijos, E., Bazan, H., Fraizy, P., Moquet, J.S., Noriega, L.,  
665 Lavado, W., Pombosa, R. Vauchel, P., Climatic control on eastern Andean  
666 denudation rates (Central Cordillera from Ecuador to Bolivia). *J. S. Am. Earth*  
667 *Sci.* 44, 85-93, 2013.

668 Perrin, A.-S., Probst, A., Probst, J.-L., Impact of nitrogenous fertilizers on carbonate  
669 dissolution in small agricultural catchments: Implications for weathering CO<sub>2</sub>  
670 uptake at regional and global scales. *Geochim, Cosmochim. Acta* 72, 3105-  
671 3123, 2008.

672 Probst, A., Gh'mari, A.El., Aubert, D., Fritz, B., McNutt, R., Strontium as a tracer of

673 weathering processes in a silicate catchment polluted by acid atmospheric  
674 inputs, Strengbach, France. *Chem. Geol.* 170, 203-219, 2000.

675 Raymo, M.E., Ruddiman, W.F., Tectonic forcing of late Cenozoic climate. *Nature* 359,  
676 117-122, 1992.

677 Raymond, P. A., Oh, N.H., Turner, R.E., Broussard, W., Anthropogenically enhanced  
678 fluxes of water and carbon from the Mississippi River. *Nature* 451, 449-452,  
679 2008.

680 Regnier, P., Friedlingstein, P., Ciais, P., Mackenzie, F.T.,...Thullner. M.,  
681 Anthropogenic perturbation of the carbon fluxes from land to ocean. *Nature*  
682 *Geosci.* 6, 597-607. 2013.

683 Reuss, J.O., Cosby, B.J., Wright, R.F., Chemical processes governing soil and water  
684 acidification. *Nature* 329, 27-32, 1987.

685 Roy, S., Gaillardet, J., Allègre, C.J., Geochemistry of dissolved and suspended loads  
686 of the Seine river, France: anthropogenic impact, carbonate and silicate  
687 weathering. *Geochim. Cosmochim. Acta* 63, 1277-1292, 1999.

688 Ryu, J.S., Lee, K.S., Chang, H.W., Shin, H.S., Chemical weathering of carbonates and  
689 silicates in the Han River basin, South Korea. *Chem. Geol.* 247, 66-80, 2008.

690 Semhi, K., Amiotte Suchet, P., Clauer, N., Probst, J.-L., Impact of nitrogen fertilizers  
691 on the natural weathering-erosion processes and fluvial transport in the Garonne  
692 basin. *Appl. Geochem.* 15 (6), 865-874, 2000.

693 Shi, C., Chemical characteristics and weathering of rivers in the Coast of Southeast  
694 China (PhD Thesis). Institute of Geology and Geophysics, Chinese academy of



695 sciences, Beijing, China. pp, 1-100 (in Chinese with English abstract), 2014.

696 Shin, W.-J., Ryu, J.-S., Park, Y., Lee, K.-S., Chemical weathering and associated CO<sub>2</sub>  
697 consumption in six major river basins, South Korea. *Geomorphology* 129, 334-  
698 341, 2011.

699 Shu, L.S., Zhou, X.M., Deng, P., Wang, B., Jiang, S.Y., Yu, J.H., Zhao, X.X.,  
700 Mesozoic tectonic evolution of the Southeast China Block: New insights from  
701 basin analysis. *J. Asian Earth Sci.* 34(3), 376-391, 2009.

702 Spence, J., Telmer, K., The role of sulfur in chemical weathering and atmospheric  
703 CO<sub>2</sub> fluxes: Evidence from major ions,  $\delta^{13}\text{C}_{\text{DIC}}$ , and  $\delta^{34}\text{S}_{\text{SO}_4}$  in rivers of the  
704 Canadian Cordillera. *Geochim. Cosmochim. Acta* 69, 5441-5458, 2005.

705 Stallard, R.F., Edmond, J.M., Geochemistry of the Amazon. Precipitation chemistry  
706 and the marine contribution to the dissolved load at the time of peak discharge.  
707 *J. Geophys. Res.*, 86, 9844-9858, 1981.

708 U.S. Nat. Res. Council Comm., Basic Research Opportunities in Earth Science.  
709 Washington, DC: Nat. Acad. 154 pp., 2001.

710 Viers, J., Dupré, B., Braun, J.J., Freyrier, R., Greenberg, S., Ngoupayou, J.N.,  
711 Nkamdjou, L.S., Evidence for non-conservative behavior of chlorine in humid  
712 tropical environments. *Aquat. Geochem.* 7, 127-154, 2001.

713 Vries, W.D., Reinds, G.J. Vel E., Intensive monitoring of forest ecosystems in Europe.  
714 2-Atmospheric deposition and its impacts on soil solution chemistry. *For. Ecol.*  
715 *Manage.* 174, 97-115, 2003.

716 Wang, T.J., Jin, L.S., Li, Z.K., Lam K.S., A modeling study on acid rain and

717 recommended emission control strategies in China. *Atmos. Environ.* 34, 4467-  
718 4477, 2000.

719 West, A.J., Galy, A., Bickle, M., Tectonic and climatic controls on silicate weathering.  
720 *Earth Planet. Sci. Lett.* 235, 211-228, 2005.

721 Wu, W., Zheng, H., Yang, J., Luo, C., Zhou, B., Chemical weathering, atmospheric  
722 CO<sub>2</sub> consumption, and the controlling factors in a subtropical metamorphic-  
723 hosted watershed. *Chem. Geol.* 356, 141-150, 2013.

724 Xiang, L., Study on Coupling between Water and Carbon of Artificial Forests  
725 Communities in Subtropical Southern China. Master Dissertation, Institute of  
726 Geographical Sciences and Natural Sources, Chinese Academy of Sciences,  
727 China (in Chinese), 2006.

728 Xu, H., Bi, X-H., Feng, Y-C., Lin, F-M., Jiao, L., Hong, S-M., Liu, W-G., Zhang, X.-  
729 Y., Chemical composition of precipitation and its sources in Hangzhou, China.  
730 *Environ. Monit. Assess.* 183:581-592, 2011.

731 Xu, Y., Wang C.Y., Zhao T., Using detrital zircons from river sands to constrain major  
732 tectono-thermal events of the Cathaysia Block, SE China. *J. Asian Earth Sci.*  
733 124, 1-13, 2016.

734 Xu, Z., Liu, C.-Q., Chemical weathering in the upper reaches of Xijiang River  
735 draining the Yunnan-Guizhou Plateau, Southwest China. *Chem. Geol.* 239, 83-  
736 95, 2007.

737 Xu, Z., Liu, C.-Q., Water geochemistry of the Xijiang basin rivers, South China:  
738 Chemical weathering and CO<sub>2</sub> consumption. *Appl. Geochem.* 25, 1603-1614,

739 2010.

740 Yoshimura, K., Nakao, S., Noto, M., Inokura, Y., Urata, K., Chen, M., Lin, P.W.,  
741 Geochemical and stable isotope studies on natural water in the Taroko Gorge  
742 karst area, Taiwan - chemical weathering of carbonate rocks by deep source  
743 CO<sub>2</sub> and sulfuric acid. *Chem. Geol.* 177, 415–430, 2001.

744 Zhang, M., Wang, S., Wu, F., Yuan, X., Zhang, Y., Chemical compositions of wet  
745 precipitation and anthropogenic influences at a developing urban site in  
746 southeastern China. *Atmos. Res.* 84, 311-322, 2007a.

747 Zhang, S.R., Lu, X. X., Higgitt, D. L., Chen, C.T.A., Sun, H.-G., Han, J.T., Water  
748 chemistry of the Zhujiang (Pearl River): Natural processes and anthropogenic  
749 influences. *J. Geophys. Res.* 112, F01011, 2007b.

750 Zhao, W., An analysis on the changing trend of acid rain and its causes in Fujian  
751 Province. *Fujian Geogr.* 19, 1-5 (in Chinese), 2004.

752 Zhou, X.M., Li, W.X., Origin of Late Mesozoic igneous rocks in Southeastern China:  
753 Implications for lithosphere subduction and underplating of mafic magmas.  
754 *Tectonophysics* 326(3-4), 269-287, 2000.

755 Zhou, X.M., Sun, T., Shen, W.Z., et al., Petrogenesis of Mesozoic granitoids and  
756 volcanic rocks in South China: A response to tectonic evolution. *Episodes* 29(1),  
757 26-33, 2006.

758 ZJBGMR: Zhejiang Bureau of Geology and Mineral Resources, Regional Geology of  
759 Zhejiang Province. Geol. Publ. House, Beijing, p. 617 (in Chinese with English  
760 abstract), 1989.

Table 1 Chemical and carbon isotopic compositions of river waters in the Southeast Coastal Rivers Basin (SECRB) of China.

| Rivers    | Sample number | Date (M/D/Y) | pH   | T °C  | EC $\mu\text{s cm}^{-1}$ | Na <sup>+</sup> $\mu\text{M}$ | K <sup>+</sup> $\mu\text{M}$ | Mg <sup>2+</sup> $\mu\text{M}$ | Ca <sup>2+</sup> $\mu\text{M}$ | F <sup>-</sup> $\mu\text{M}$ | Cl <sup>-</sup> $\mu\text{M}$ | NO <sub>3</sub> <sup>-</sup> $\mu\text{M}$ | SO <sub>4</sub> <sup>2-</sup> $\mu\text{M}$ | HCO <sub>3</sub> <sup>-</sup> $\mu\text{M}$ | SiO <sub>2</sub> $\mu\text{M}$ | TZ <sup>+</sup> $\mu\text{Eq}$ | TZ <sup>-</sup> $\mu\text{Eq}$ | NICB % | $\delta^{13}\text{C}$ ‰ | TDS $\text{mg l}^{-1}$ |
|-----------|---------------|--------------|------|-------|--------------------------|-------------------------------|------------------------------|--------------------------------|--------------------------------|------------------------------|-------------------------------|--------------------------------------------|---------------------------------------------|---------------------------------------------|--------------------------------|--------------------------------|--------------------------------|--------|-------------------------|------------------------|
| Qiantang* | 1             | 07-8-10      | 7.42 | 28.78 | 190                      | 347                           | 197                          | 106                            | 473                            | 12.0                         | 303                           | 62.6                                       | 147                                         | 1130                                        | 148                            | 1703                           | 1789                           | -5.0   | -19.0                   | 144                    |
|           | 2             | 07-9-10      | 7.60 | 23.84 | 146                      | 87.5                          | 204                          | 80.9                           | 496                            | 11.7                         | 75.2                          | 124                                        | 121                                         | 907                                         | 156                            | 1446                           | 1348                           | 6.7    | -19.8                   | 119                    |
|           | 3             | 07-9-10      | 7.37 | 27.83 | 308                      | 555                           | 233                          | 208                            | 698                            | 41.8                         | 312                           | 223                                        | 437                                         | 1170                                        | 170                            | 2601                           | 2579                           | 0.9    | -17.8                   | 204                    |
|           | 4             | 07-10-10     | 7.27 | 26.28 | 177                      | 176                           | 135                          | 116                            | 544                            | 15.7                         | 151                           | 142                                        | 170                                         | 985                                         | 175                            | 1632                           | 1618                           | 0.8    | -19.3                   | 135                    |
|           | 5             | 07-10-10     | 7.05 | 24.15 | 123                      | 130                           | 101                          | 66.2                           | 349                            | 17.7                         | 94.3                          | 124                                        | 157                                         | 529                                         | 169                            | 1061                           | 1061                           | 0.0    | -18.7                   | 91.2                   |
|           | 6             | 07-10-10     | 7.24 | 23.75 | 140                      | 97.6                          | 69.7                         | 81.0                           | 451                            | 20.0                         | 62.1                          | 109                                        | 204                                         | 703                                         | 164                            | 1231                           | 1282                           | -4.2   | -21.3                   | 106.6                  |
|           | 7             | 07-11-10     | 7.40 | 23.23 | 107                      | 92.5                          | 70.5                         | 68.3                           | 327                            | 14.9                         | 74.9                          | 104                                        | 147                                         | 486                                         | 156                            | 954                            | 960                            | -0.6   | -21.0                   | 82.2                   |
|           | 8             | 07-11-10     | 7.16 | 27.61 | 281                      | 361                           | 87.5                         | 128                            | 469                            | 26.8                         | 245                           | 191                                        | 239                                         | 810                                         | 179                            | 1642                           | 1724                           | -5.0   | -12.9                   | 137.5                  |
|           | 9             | 07-11-10     | 7.02 | 26.48 | 140                      | 275                           | 120                          | 60.7                           | 319                            | 36.2                         | 199                           | 150                                        | 180                                         | 437                                         | 236                            | 1155                           | 1146                           | 0.8    | -13.9                   | 100.2                  |
|           | 10            | 07-12-10     | 7.05 | 24.24 | 99                       | 205                           | 114                          | 58.3                           | 285                            | 14.6                         | 191                           | 114                                        | 132                                         | 305                                         | 278                            | 1005                           | 874                            | 13.1   | -20.9                   | 85.4                   |
|           | 11            | 07-12-10     | 7.05 | 27.01 | 102                      | 123                           | 133                          | 49.8                           | 284                            | 18.6                         | 86.5                          | 123                                        | 144                                         | 377                                         | 183                            | 924                            | 874                            | 5.4    | -19.2                   | 79.4                   |
|           | 12            | 07-12-10     | 7.99 | 24.18 | 260                      | 50.0                          | 85.4                         | 212                            | 993                            | -                            | 66.8                          | 153                                        | 235                                         | 1822                                        | 172                            | 2546                           | 2512                           | 1.4    | -17.6                   | 205.2                  |
|           | 13            | 07-12-10     | 7.86 | 24.59 | 231                      | 43.5                          | 88.4                         | 189                            | 859                            | -                            | 55.1                          | 97.6                                       | 169                                         | 1763                                        | 170                            | 2228                           | 2253                           | -1.1   | -18.7                   | 185.4                  |
|           | 14            | 07-12-10     | 7.69 | 22.66 | 131                      | 44.1                          | 81.0                         | 113                            | 458                            | -                            | 19.1                          | 95.2                                       | 107                                         | 920                                         | 143                            | 1266                           | 1248                           | 1.4    | -18.1                   | 106.8                  |
|           | 15            | 07-12-10     | 7.65 | 24.48 | 106                      | 61.1                          | 98.3                         | 87.9                           | 335                            | -                            | 37.2                          | 68.3                                       | 112                                         | 663                                         | 164                            | 1005                           | 992                            | 1.4    | -18.6                   | 87.3                   |
|           | 16            | 07-12-10     | 7.46 | 23.68 | 125                      | 64.3                          | 108                          | 117                            | 406                            | -                            | 25.9                          | 75.0                                       | 174                                         | 687                                         | 164                            | 1218                           | 1136                           | 6.7    | -20.0                   | 98.8                   |
|           | 17            | 07-13-10     | 7.33 | 24.08 | 139                      | 59.8                          | 116                          | 136                            | 429                            | -                            | 29.6                          | 80.4                                       | 209                                         | 752                                         | 162                            | 1305                           | 1281                           | 1.9    | -20.8                   | 108.1                  |
|           | 18            | 07-10-10     | 7.27 | 25.74 | 141                      | 163                           | 114                          | 69.6                           | 396                            | 27.3                         | 126                           | 148                                        | 161                                         | 597                                         | 153                            | 1209                           | 1195                           | 1.1    | -21.0                   | 101.0                  |
| Cao'e     | 19            | 07-16-10     | 7.17 | 22.27 | 108                      | 212                           | 86.3                         | 69.4                           | 183                            | 5.1                          | 151                           | 148                                        | 114                                         | 384                                         | 216                            | 803                            | 912                            | -13.5  | -21.2                   | 79.1                   |
|           | 20            | 07-16-10     | 7.06 | 26.57 | 182                      | 401                           | 77.6                         | 145                            | 275                            | 18.3                         | 269                           | 185                                        | 245                                         | 534                                         | 215                            | 1318                           | 1478                           | -12.2  | -20.5                   | 116.9                  |
|           | 21            | 07-16-10     | 7.14 | 27.26 | 171                      | 333                           | 91.3                         | 164                            | 362                            | 18.1                         | 224                           | 194                                        | 207                                         | 658                                         | 225                            | 1475                           | 1490                           | -1.0   | -20.9                   | 123.3                  |
|           | 22            | 07-16-10     | 7.08 | 27.17 | 173                      | 346                           | 94.4                         | 168                            | 364                            | 18.8                         | 247                           | 200                                        | 211                                         | 656                                         | 222                            | 1506                           | 1526                           | -1.3   | -13.0                   | 125.2                  |
| Ling      | 23            | 07-15-10     | 7.07 | 24.14 | 52                       | 164                           | 42.9                         | 34.9                           | 140                            | 4.9                          | 40.7                          | 61.5                                       | 68.3                                        | 277                                         | 190                            | 558                            | 516                            | 7.6    | -12.8                   | 52.1                   |
|           | 24            | 07-15-10     | 7.02 | 26.04 | 74                       | 169                           | 92.0                         | 34.2                           | 150                            | 6.4                          | 87.0                          | 77.3                                       | 92.8                                        | 272                                         | 196                            | 629                            | 622                            | 1.1    | -20.8                   | 59.5                   |
|           | 25            | 07-16-10     | 7.34 | 25.03 | 92                       | 159                           | 80.1                         | 47.3                           | 235                            | 19.3                         | 78.0                          | 71.4                                       | 105                                         | 455                                         | 187                            | 804                            | 815                            | -1.4   | -22.5                   | 73.9                   |
|           | 26            | 07-16-10     | 7.40 | 26.75 | 113                      | 216                           | 77.8                         | 57.1                           | 249                            | 20.2                         | 133                           | 90.0                                       | 115                                         | 494                                         | 196                            | 905                            | 946                            | -4.5   | -12.7                   | 82.8                   |
|           | 27            | 07-16-10     | 7.39 | 26    | 89                       | 174                           | 86.4                         | 56.4                           | 209                            | 9.0                          | 99.3                          | 78.4                                       | 99.9                                        | 420                                         | 199                            | 792                            | 798                            | -0.8   | -14.0                   | 72.7                   |
|           | 28            | 07-15-10     | 6.79 | 22.33 | 75                       | 159                           | 82.7                         | 44.1                           | 143                            | -                            | 107                           | 61.8                                       | 83.4                                        | 306                                         | 144                            | 616                            | 641                            | -4.1   | -21.1                   | 56.5                   |
|           | 29            | 07-15-10     | 8.24 | 27.15 | 129                      | 228                           | 92.1                         | 83.1                           | 317                            | 17.2                         | 177                           | 90.5                                       | 120                                         | 641                                         | 194                            | 1120                           | 1148                           | -2.5   | -19.2                   | 97.8                   |
| Ou        | 30            | 07-13-10     | 8.08 | 28.45 | 48                       | 95.2                          | 107                          | 38.4                           | 92.1                           | 15.2                         | 31.8                          | 43.3                                       | 47.4                                        | 291                                         | 221                            | 463                            | 461                            | 0.4    | -21.7                   | 50.6                   |
|           | 31            | 07-13-10     | 6.71 | 22.97 | 32                       | 60.7                          | 106                          | 12.6                           | 65.0                           | 10.8                         | 28.9                          | 45.0                                       | 48.9                                        | 158                                         | 169                            | 322                            | 329                            | -2.2   | -23.8                   | 36.9                   |
|           | 32            | 07-13-10     | 7.18 | 27.59 | 73                       | 107                           | 127                          | 36.2                           | 175                            | 4.3                          | 57.1                          | 111                                        | 92.0                                        | 283                                         | 210                            | 655                            | 634                            | 3.2    | -23.4                   | 62.9                   |
|           | 33            | 07-13-10     | 6.94 | 24.2  | 44                       | 76.9                          | 112                          | 20.0                           | 99.1                           | 10.9                         | 27.9                          | 63.1                                       | 58.6                                        | 249                                         | 184                            | 427                            | 457                            | -7.0   | -22.5                   | 47.5                   |
|           | 34            | 07-14-10     | 7.16 | 27.45 | 90                       | 187                           | 127                          | 41.2                           | 199.5                          | 17.0                         | 85.6                          | 102                                        | 116                                         | 367                                         | 251                            | 796                            | 787                            | 1.1    | -22.4                   | 76.5                   |
|           | 35            | 07-14-10     | 6.97 | 24.56 | 54                       | 105                           | 50.9                         | 29.2                           | 122                            | 12.2                         | 46.1                          | 67.8                                       | 73.1                                        | 218                                         | 193                            | 460                            | 478                            | -4.1   | -22.5                   | 47.9                   |
|           | 36            | 07-14-10     | 6.82 | 21.12 | 31                       | 76.4                          | 133                          | 12.7                           | 74.5                           | 7.7                          | 20.7                          | 36.8                                       | 49.1                                        | 192                                         | 162                            | 383                            | 348                            | 9.3    | -                       | 39.5                   |
|           | 37            | 07-14-10     | 6.82 | 23.69 | 45                       | 89.5                          | 105                          | 19.0                           | 97.8                           | 10.6                         | 39.6                          | 52.8                                       | 59.1                                        | 231                                         | 185                            | 428                            | 441                            | -3.0   | -22.9                   | 46.2                   |
|           | 38            | 07-15-10     | 6.92 | 24.69 | 37                       | 100                           | 89.3                         | 21.1                           | 49.7                           | 1.7                          | 36.9                          | 45.5                                       | 52.7                                        | 153                                         | 202                            | 331                            | 341                            | -2.9   | -                       | 38.9                   |
|           | 39            | 07-15-10     | 6.90 | 23.86 | 35                       | 92.2                          | 92.0                         | 19.8                           | 61.4                           | 1.9                          | 43.9                          | 47.9                                       | 55.5                                        | 139                                         | 193                            | 347                            | 342                            | 1.4    | -22.3                   | 38.5                   |
|           | 40            | 07-15-10     | 7.09 | 25.56 | 47                       | 117                           | 112                          | 25.7                           | 83.4                           | 8.0                          | 52.4                          | 63.1                                       | 57.4                                        | 232                                         | 193                            | 447                            | 462                            | -3.3   | -22.5                   | 48.1                   |
|           | 41            | 07-14-10     | 6.97 | 24.25 | 53                       | 102                           | 107                          | 27.6                           | 119                            | 13.4                         | 43.5                          | 59.4                                       | 73.2                                        | 277                                         | 183                            | 502                            | 526                            | -4.9   | -13.7                   | 52.3                   |

|         |    |          |      |       |      |      |      |      |      |      |      |      |      |     |     |      |      |      |       |       |
|---------|----|----------|------|-------|------|------|------|------|------|------|------|------|------|-----|-----|------|------|------|-------|-------|
| Feiyun  | 42 | 07-17-10 | 7.28 | 25.19 | 38   | 94.0 | 81.7 | 24.0 | 75.6 | 11.4 | 59.9 | 45.7 | 51.9 | 149 | 151 | 375  | 358  | 4.5  | -     | 37.2  |
|         | 43 | 07-17-10 | 7.08 | 25.61 | 46   | 101  | 79.9 | 33.9 | 93.4 | 4.6  | 66.2 | 55.1 | 52.8 | 223 | 151 | 435  | 450  | -3.3 | -23.7 | 43.5  |
| Jiaoxi  | 44 | 07-17-10 | 7.52 | 26.92 | 47   | 116  | 81.5 | 25.2 | 92.0 | 4.1  | 73.3 | 80.3 | 25.0 | 226 | 151 | 432  | 430  | 0.5  | -23.4 | 43.0  |
|         | 45 | 07-17-10 | 7.45 | 27.46 | 61   | 152  | 90.2 | 34.2 | 119  | -    | 136  | 59.8 | 53.5 | 238 | 184 | 548  | 542  | 1.2  | -23.1 | 51.8  |
|         | 46 | 07-18-10 | 6.90 | 27.66 | 53   | 127  | 88.1 | 33.4 | 94.4 | 7.0  | 123  | 93.1 | 30.4 | 209 | 177 | 471  | 486  | -3.3 | -14.4 | 47.4  |
| Huotong | 47 | 07-18-10 | 7.34 | 24    | 43   | 116  | 78.8 | 26.1 | 58.4 | 5.4  | 68.7 | 49.7 | 20.1 | 197 | 190 | 364  | 355  | 2.3  | -22.8 | 39.6  |
| Ao      | 48 | 07-19-10 | 7.24 | 31.44 | 124  | 294  | 121  | 102  | 209  | 24.3 | 204  | 73.6 | 52.0 | 717 | 370 | 1036 | 1100 | -6.1 | -19.4 | 105.4 |
|         | 49 | 07-19-10 | 7.13 | 27.82 | 46   | 109  | 96.3 | 30.0 | 73.8 | -    | 72.0 | 51.3 | 22.5 | 234 | 236 | 413  | 402  | 2.6  | -     | 46.2  |
|         | 50 | 07-18-10 | 6.98 | 28.65 | 53   | 140  | 88.4 | 40.8 | 100  | 3.0  | 82.9 | 58.6 | 20.9 | 294 | 233 | 511  | 477  | 6.6  | -22.3 | 52.2  |
| Min     | 51 | 07-27-10 | 7.11 | 28.4  | 42   | 116  | 92.0 | 40.5 | 119  | 18.0 | 43.9 | 35.5 | 26.0 | 382 | 182 | 526  | 513  | 2.4  | -19.4 | 52.7  |
|         | 52 | 07-27-10 | 7.17 | 30    | 51   | 102  | 97.9 | 41.7 | 107  | 4.6  | 29.4 | 45.3 | 35.0 | 350 | 221 | 496  | 495  | 0.2  | -     | 53.3  |
|         | 53 | 07-27-10 | 7.08 | 29.4  | 99   | 214  | 92.7 | 46.4 | 126  | 18.4 | 50.1 | 39.8 | 118  | 327 | 154 | 651  | 654  | -0.4 | -20.8 | 74.0  |
|         | 54 | 07-27-10 | 7.06 | 29.1  | 44   | 107  | 99.6 | 28.1 | 114  | 16.4 | 18.7 | 36.4 | 44.3 | 305 | 265 | 491  | 449  | 8.5  | -17.6 | 53.6  |
|         | 55 | 07-27-10 | 7.42 | 29.4  | 57   | 139  | 93.7 | 49.8 | 113  | 3.1  | 67.1 | 56.3 | 26.6 | 384 | 236 | 558  | 561  | -0.5 | -16.4 | 58.6  |
|         | 56 | 07-27-10 | 7.12 | 27.8  | 51   | 103  | 91.0 | 50.8 | 106  | 4.7  | 82.8 | 35.1 | 63.5 | 249 | 225 | 507  | 494  | 2.5  | -     | 51.3  |
|         | 57 | 07-27-10 | 7.08 | 27.5  | 40   | 125  | 45.0 | 36.8 | 107  | 12.1 | 43.6 | 44.5 | 29.3 | 288 | 211 | 457  | 435  | 5.0  | -21.1 | 47.4  |
|         | 58 | 07-27-10 | 6.99 | 27.2  | 52   | 121  | 98.0 | 42.4 | 115  | 16.7 | 87.1 | 36.6 | 70.9 | 277 | 228 | 535  | 542  | -1.4 | -11.4 | 55.3  |
|         | 59 | 07-27-10 | 6.87 | 29    | 59   | 154  | 91.4 | 59.4 | 124  | 16.5 | 77.8 | 36.7 | 88.3 | 272 | 222 | 612  | 563  | 8.0  | -20.3 | 57.2  |
|         | 60 | 07-27-10 | 7.31 | 27.1  | 78   | 109  | 92.1 | 59.1 | 181  | 21.2 | 123  | 37.5 | 78.4 | 355 | 202 | 682  | 672  | 1.4  | -18.7 | 63.1  |
|         | 61 | 07-27-10 | 7.22 | 27.8  | 37   | 122  | 83.3 | 52.8 | 142  | 17.4 | 111  | 37.3 | 80.4 | 288 | 221 | 596  | 597  | -0.2 | -22.3 | 58.1  |
|         | 62 | 07-27-10 | 7.16 | 28.1  | 58   | 104  | 83.3 | 59.3 | 163  | 24.0 | 34.6 | 34.5 | 118  | 294 | 214 | 632  | 599  | 5.2  | -13.4 | 59.5  |
|         | 63 | 07-27-10 | 7.26 | 28.3  | 87   | 139  | 86.1 | 60.9 | 191  | 14.8 | 48.0 | 93.0 | 109  | 347 | 226 | 729  | 707  | 3.0  | -21.4 | 68.6  |
|         | 64 | 07-27-10 | 7.00 | 28.8  | 87   | 127  | 93.1 | 58.7 | 195  | 6.6  | 59.8 | 81.1 | 60.9 | 480 | 232 | 729  | 743  | -2.0 | -11.0 | 74.0  |
|         | 65 | 07-28-10 | 6.97 | 27.9  | 37   | 163  | 82.1 | 52.2 | 140  | 20.2 | 53.1 | 60.0 | 106  | 306 | 221 | 630  | 632  | -0.2 | -     | 61.9  |
|         | 66 | 07-13-10 | 7.07 | 27.96 | 59   | 91.9 | 110  | 40.0 | 127  | 24.8 | 62.0 | 79.3 | 62.3 | 249 | 228 | 535  | 515  | 3.8  | -     | 54.8  |
|         | 67 | 07-28-10 | 7.12 | 29.7  | 38   | 108  | 93.4 | 45.9 | 133  | 12.4 | 48.3 | 34.0 | 56.6 | 368 | 220 | 560  | 564  | -0.7 | -     | 57.7  |
|         | 68 | 07-27-10 | 7.03 | 29.9  | 62   | 128  | 96.7 | 57.6 | 148  | 23.3 | 81.6 | 36.8 | 74.1 | 374 | 203 | 635  | 641  | -0.9 | -12.4 | 61.7  |
|         | 69 | 07-27-10 | 7.01 | 28.8  | 60   | 102  | 89.1 | 73.6 | 138  | 9.6  | 50.6 | 74.1 | 32.7 | 417 | 233 | 615  | 607  | 1.3  | -21.0 | 62.3  |
|         | 70 | 07-27-10 | 7.06 | 26.5  | 37   | 93.5 | 93.1 | 34.7 | 87.3 | -    | 26.6 | 34.8 | 37.1 | 312 | 222 | 431  | 448  | -3.9 | -13.1 | 49.1  |
|         | 71 | 07-27-10 | 7.09 | 26.5  | 25   | 62.6 | 92.7 | 27.0 | 61.5 | 4.7  | 21.5 | 18.6 | 43.4 | 191 | 154 | 332  | 318  | 4.2  | -16.0 | 35.3  |
|         | 72 | 07-28-10 | 7.07 | 30.1  | 39   | 76.3 | 87.9 | 35.1 | 87.6 | 7.4  | 43.1 | 36.6 | 35.5 | 266 | 175 | 409  | 416  | -1.7 | -19.4 | 43.5  |
|         | 73 | 07-27-10 | 7.01 | 28.7  | 47   | 84.9 | 95.4 | 56.7 | 106  | 12.7 | 51.8 | 49.2 | 57.2 | 315 | 211 | 506  | 531  | -4.8 | -     | 53.8  |
|         | 74 | 07-27-10 | 6.85 | 28.7  | 50   | 93.6 | 85.9 | 52.4 | 107  | 14.1 | 62.8 | 57.5 | 57.0 | 252 | 217 | 498  | 487  | 2.2  | -19.9 | 50.9  |
|         | 75 | 07-27-10 | 7.11 | 29.7  | 69   | 117  | 85.2 | 73.4 | 159  | 7.6  | 63.7 | 75.2 | 47.4 | 418 | 230 | 666  | 652  | 2.2  | -22.2 | 65.0  |
|         | 76 | 07-28-10 | 6.93 | 28.9  | 59   | 112  | 88.0 | 61.8 | 122  | 6.0  | 57.4 | 89.3 | 42.0 | 349 | 224 | 568  | 580  | -2.2 | -22.0 | 58.8  |
|         | 77 | 07-21-10 | 7.76 | 32.4  | 51.2 | 163  | 85.5 | 52.8 | 151  | 20.2 | 55.3 | 70.3 | 78.6 | 372 | 175 | 656  | 655  | 0.3  | -12.5 | 61.8  |
|         | 78 | 07-28-10 | 7.29 | 26.8  | 106  | 129  | 75.3 | 84.0 | 321  | 24.0 | 56.2 | 41.0 | 166  | 599 | 202 | 1013 | 1028 | -1.4 | -16.3 | 90.3  |
|         | 79 | 07-21-10 | 7.09 | 26.96 | 56   | 112  | 87.6 | 37.1 | 129  | 4.5  | 51.5 | 44.9 | 61.9 | 327 | 276 | 531  | 547  | -2.9 | -22.2 | 59.1  |
|         | 80 | 07-21-10 | 7.64 | 33.37 | 83   | 114  | 96.2 | 60.6 | 151  | 16.7 | 53.0 | 40.6 | 102  | 371 | 242 | 633  | 670  | -5.8 | -12.8 | 66.2  |
|         | 81 | 07-21-10 | 7.83 | 31.27 | 65   | 131  | 102  | 52.7 | 141  | 16.1 | 45.3 | 49.7 | 91.8 | 324 | 239 | 620  | 603  | 2.8  | -13.4 | 61.8  |
|         | 82 | 07-21-10 | 6.84 | 28.35 | 66   | 132  | 101  | 52.5 | 141  | 5.8  | 63.8 | 54.1 | 91.6 | 304 | 243 | 621  | 606  | 2.5  | -22.7 | 61.5  |
|         | 83 | 07-21-10 | 7.42 | 30.7  | 98   | 217  | 113  | 59.2 | 210  | 18.4 | 98.7 | 63.5 | 84.7 | 496 | 320 | 868  | 827  | 4.6  | -18.9 | 84.5  |
|         | 84 | 07-27-10 | 7.26 | 26.3  | 46   | 104  | 102  | 29.7 | 121  | 3.6  | 55.2 | 51.9 | 55.5 | 294 | 193 | 507  | 512  | -0.9 | -21.6 | 51.9  |
|         | 85 | 07-27-10 | 7.07 | 25.4  | 30   | 73.3 | 99.2 | 19.6 | 78.8 | -    | 22.9 | 40.0 | 49.2 | 203 | 170 | 369  | 365  | 1.3  | -21.1 | 39.8  |
|         | 86 | 07-27-10 | 7.50 | 27.3  | 45   | 102  | 102  | 26.5 | 114  | 2.4  | 35.1 | 39.7 | 57.2 | 260 | 217 | 484  | 449  | 7.3  | -15.7 | 49.6  |
|         | 87 | 07-27-10 | 7.47 | 26.9  | 51   | 141  | 100  | 43.6 | 109  | 7.9  | 79.7 | 42.4 | 57.7 | 311 | 217 | 547  | 548  | -0.3 | -20.1 | 55.6  |

|          |     |          |      |       |     |      |      |       |      |      |      |      |      |     |     |      |      |      |       |       |
|----------|-----|----------|------|-------|-----|------|------|-------|------|------|------|------|------|-----|-----|------|------|------|-------|-------|
|          | 88  | 07-19-10 | 7.99 | 31.74 | 63  | 167  | 96.5 | 33.5  | 115  | 8.0  | 105  | 35.5 | 38.1 | 331 | 218 | 561  | 548  | 2.3  | -13.5 | 55.9  |
|          | 89  | 07-21-10 | 6.77 | 28.19 | 65  | 132  | 93.6 | 56.0  | 145  | 15.6 | 60.6 | 78.8 | 75.4 | 333 | 243 | 627  | 624  | 0.5  | -22.6 | 63.3  |
| Jin      | 90  | 07-27-10 | 7.36 | 25.8  | 128 | 126  | 94.8 | 88.9  | 406  | 22.9 | 51.4 | 39.4 | 229  | 595 | 208 | 1211 | 1143 | 5.6  | -20.7 | 100   |
|          | 91  | 07-27-10 | 7.40 | 26.9  | 123 | 143  | 103  | 82.7  | 347  | 21.0 | 83.5 | 203  | 182  | 463 | 226 | 1105 | 1115 | -0.9 | -21.3 | 98.4  |
|          | 92  | 07-27-10 | 7.00 | 27.4  | 88  | 170  | 98.8 | 56.8  | 205  | 7.2  | 137  | 117  | 106  | 327 | 205 | 793  | 792  | 0.1  | -22.5 | 71.8  |
|          | 93  | 07-27-10 | 7.32 | 28.7  | 73  | 201  | 116  | 87.1  | 318  | 20.0 | 93.5 | 41.5 | 189  | 508 | 267 | 1128 | 1020 | 9.6  | -21.7 | 95.3  |
| Jiulong  | 94  | 07-30-10 | 6.50 | 23.47 | 29  | 72.3 | 92.4 | 22.8  | 59.8 | 12.4 | 25.1 | 27.0 | 50.0 | 189 | 213 | 330  | 341  | -3.4 | -18.1 | 40.1  |
|          | 95  | 07-30-10 | 7.06 | 29.35 | 120 | 136  | 96.9 | 106   | 339  | 5.1  | 67.7 | 66.3 | 249  | 469 | 202 | 1124 | 1100 | 2.1  | -20.8 | 94.2  |
|          | 96  | 07-30-10 | 7.45 | 27.6  | 104 | 79.5 | 97.5 | 106   | 363  | 14.4 | 70.7 | 50.0 | 99.9 | 729 | 184 | 1116 | 1049 | 6.0  | -18.9 | 93.7  |
|          | 97  | 07-31-10 | 7.36 | 26.59 | 139 | 140  | 100  | 142   | 432  | 15.5 | 79.6 | 78.3 | 274  | 573 | 196 | 1388 | 1278 | 8.0  | -19.7 | 108.8 |
|          | 98  | 07-31-10 | 7.72 | 26.18 | 88  | 77.6 | 96.2 | 69.0  | 313  | 19.9 | 39.7 | 34.6 | 63.8 | 731 | 251 | 938  | 933  | 0.5  | -18.4 | 89.4  |
|          | 99  | 07-30-10 | 7.43 | 26.96 | 119 | 200  | 93.8 | 100.2 | 298  | 19.9 | 122  | 80.5 | 225  | 387 | 202 | 1091 | 1040 | 4.7  | -20.5 | 89.5  |
|          | 100 | 07-28-10 | 7.41 | 26.66 | 112 | 173  | 97.9 | 94.4  | 286  | 46.1 | 118  | 152  | 201  | 364 | 207 | 1033 | 1036 | -0.3 | -20.9 | 92.2  |
|          | 101 | 07-29-10 | 7.16 | 29.35 | 82  | 151  | 110  | 55.4  | 178  | 4.9  | 71.2 | 170  | 53.2 | 385 | 305 | 727  | 732  | -0.7 | -21.2 | 76.1  |
|          | 102 | 07-29-10 | 7.10 | 28.9  | 100 | 222  | 98.3 | 49.4  | 249  | 3.6  | 126  | 157  | 52.7 | 532 | 303 | 917  | 920  | -0.3 | -21.7 | 90.0  |
|          | 103 | 07-28-10 | 7.20 | 31.15 | 138 | 339  | 111  | 81.2  | 277  | 9.2  | 280  | 285  | 88.6 | 515 | 317 | 1165 | 1256 | -7.8 | -19.0 | 112   |
|          | 104 | 07-28-10 | 7.16 | 27.09 | 101 | 261  | 95.8 | 81.7  | 235  | 40.3 | 173  | 80.1 | 174  | 291 | 136 | 990  | 892  | 9.9  | -24.3 | 75.4  |
| Zhang    | 105 | 07-28-10 | 8.08 | 30.6  | 93  | 195  | 96.1 | 61.1  | 167  | 16.8 | 157  | 193  | 55.2 | 281 | 288 | 748  | 741  | 0.9  | -21.5 | 73.8  |
| Dongxi   | 106 | 07-28-10 | 7.20 | 30.9  | 78  | 263  | 99.0 | 41.5  | 115  | 14.5 | 238  | 65.3 | 30.0 | 283 | 309 | 675  | 646  | 4.4  | -20.8 | 66.7  |
| Huangang | 107 | 07-28-10 | 7.40 | 30.5  | 99  | 253  | 85.6 | 53.0  | 154  | 7.7  | 190  | 63.5 | 56.4 | 460 | 278 | 754  | 827  | -9.6 | -20.0 | 77.4  |
| Han      | 108 | 07-31-10 | 7.31 | 27.1  | 68  | 136  | 61.5 | 45.2  | 195  | 16.1 | 37.7 | 45.3 | 93.7 | 345 | 218 | 678  | 615  | 9.2  | -21.9 | 62.0  |
|          | 109 | 07-30-10 | 7.38 | 26.94 | 88  | 116  | 103  | 63.6  | 265  | 6.4  | 53.4 | 72.2 | 84.9 | 584 | 244 | 876  | 879  | -0.4 | -20.4 | 83.7  |
|          | 110 | 07-30-10 | 6.66 | 25.55 | 71  | 114  | 96.2 | 47.6  | 168  | 8.0  | 56.9 | 54.6 | 143  | 230 | 203 | 642  | 628  | 2.2  | -17.9 | 59.7  |
|          | 111 | 07-30-10 | 6.66 | 27.76 | 83  | 135  | 104  | 63.8  | 203  | 8.6  | 54.5 | 74.9 | 173  | 302 | 336 | 774  | 777  | -0.4 | -20.6 | 78.7  |
|          | 112 | 07-30-10 | 7.31 | 30.81 | 56  | 168  | 74.0 | 39.1  | 118  | 13.5 | 62.9 | 44.4 | 81.4 | 237 | 245 | 556  | 507  | 8.8  | -21.4 | 54.6  |
|          | 113 | 07-31-10 | 7.28 | 28.73 | 98  | 137  | 99.3 | 85.6  | 270  | 9.2  | 88.8 | 59.1 | 118  | 565 | 233 | 948  | 949  | -0.1 | -19.7 | 86.6  |
|          | 114 | 07-31-10 | 7.27 | 31.42 | 123 | 193  | 105  | 98.2  | 319  | 20.7 | 120  | 102  | 157  | 570 | 229 | 1132 | 1107 | 2.2  | -19.7 | 98.2  |
|          | 115 | 07-30-10 | 7.43 | 29.89 | 85  | 115  | 97.5 | 65.5  | 244  | 6.5  | 46.5 | 58.6 | 103  | 511 | 251 | 832  | 822  | 1.1  | -20.8 | 79.3  |
|          | 116 | 07-31-10 | 7.61 | 30.98 | 99  | 123  | 104  | 85.9  | 264  | 5.6  | 58.8 | 90.9 | 108  | 588 | 98  | 926  | 952  | -2.9 | -20.0 | 79.4  |
|          | 117 | 07-31-10 | 7.31 | 29.96 | 93  | 151  | 103  | 78.1  | 250  | 15.4 | 68.0 | 99.1 | 173  | 379 | 233 | 909  | 891  | 1.9  | -21.9 | 81.8  |
|          | 118 | 07-31-10 | 7.35 | 28.4  | 2   | 233  | 84.2 | 101   | 323  | 12.8 | 84.0 | 101  | 203  | 460 | 229 | 1165 | 1051 | 9.8  | -21.1 | 94.7  |
|          | 119 | 07-31-10 | 7.67 | 30.38 | 93  | 136  | 87.8 | 73.6  | 231  | 16.4 | 64.6 | 94.4 | 184  | 382 | 226 | 834  | 909  | -9.1 | -20.8 | 80.5  |
| Rong     | 120 | 07-30-10 | 7.57 | 31.83 | 68  | 193  | 79.1 | 50.3  | 146  | 16.4 | 192  | 84.0 | 31.5 | 344 | 309 | 664  | 683  | -2.8 | -20.3 | 65.8  |
|          | 121 | 07-30-10 | 6.96 | 30.62 | 94  | 509  | 103  | 56.1  | 213  | 15.9 | 511  | 78.5 | 82.3 | 379 | 222 | 1150 | 1133 | 1.5  | -20.0 | 94.4  |

TZ<sup>+</sup> is the total cationic charge; TZ<sup>-</sup> is the total anionic charge; NICB is the normalized inorganic charge balance and TDS is the total dissolved solid. \*data of major ion composition from the previous work by Liu et al. 2016.

Table 2 Chemical compositions of precipitation at different sites located within the studied area (in  $\mu\text{mol l}^{-1}$  and molar ratio).

| Province | Location | pH   | F <sup>-</sup> | Cl <sup>-</sup> | NO <sub>3</sub> <sup>-</sup> | SO <sub>4</sub> <sup>2-</sup> | NH <sub>4</sub> <sup>+</sup> | K <sup>+</sup> | Na <sup>+</sup> | Ca <sup>2+</sup> | Mg <sup>2+</sup> | NO <sub>3</sub> /Cl | SO <sub>4</sub> /Cl | K/Cl | Na/Cl | Ca/Cl | Mg/Cl | Reference          |  |
|----------|----------|------|----------------|-----------------|------------------------------|-------------------------------|------------------------------|----------------|-----------------|------------------|------------------|---------------------|---------------------|------|-------|-------|-------|--------------------|--|
| Zhejiang | Hangzhou | 4.5  | 5.76           | 13.9            | 38.4                         | 55                            | 79.9                         | 4.18           | 12.2            | 26               | 3.53             | 2.76                | 3.96                | 0.3  | 0.88  | 1.87  | 0.25  | Xu et al., 2011    |  |
|          | Jinhua   | 4.54 | 9.05           | 8.51            | 31.2                         | 47.6                          | 81.1                         | 4.73           | 6.27            | 24               | 1.73             | 3.67                | 5.59                | 0.56 | 0.74  | 2.81  | 0.2   | Zhang et al., 2007 |  |
| Fujian   | Nanping  | 4.81 | 0.8            | 5.8             | 26.6                         | 18.3                          | 38                           | 4.9            | 5.4             | 12.9             | 2.7              | 4.59                | 3.16                | 0.84 | 0.93  | 2.22  | 0.47  | Cheng et al., 2011 |  |
|          | Fuzhou   |      | 5.26           | 21.4            | 24.9                         | 48.5                          | 78.1                         | 4.1            | 2.61            | 32.7             | 1.25             | 1.16                | 2.26                | 0.19 | 0.12  | 1.53  | 0.06  | Zhao, 2004         |  |
|          | Xiamen   | 4.57 | 15.3           | 23.7            | 22.1                         | 31.3                          | 37.7                         | 3.58           | 36.1            | 21.5             | 4.94             | 0.93                | 1.32                | 0.15 | 1.52  | 0.91  | 0.21  | Zhao, 2004         |  |
| Average  |          |      |                |                 |                              |                               |                              |                |                 |                  |                  | 2.62                | 3.26                | 0.41 | 0.84  | 1.87  | 0.24  |                    |  |

Table 3 Contribution of each reservoir, fluxes, chemical weathering and associated CO<sub>2</sub> consumption rates for the major rivers and their main tributaries in the SECRB.

| Major river | Tributaries | Location   | Discharge<br>10 <sup>9</sup> m <sup>3</sup> a <sup>-1</sup> | Area<br>10 <sup>3</sup> km <sup>2</sup> | Runoff<br>mm a <sup>-1</sup> | Contribution (%) |       |      |       | Fluxes<br>(10 <sup>6</sup> ton a <sup>-1</sup> ) |      | Weathering rate<br>(ton km <sup>-2</sup> a <sup>-1</sup> ) |                  |                  | CO <sub>2</sub> consumption rate<br>(10 <sup>3</sup> mol km <sup>-2</sup> a <sup>-1</sup> ) |                  |                  |                  |                  |
|-------------|-------------|------------|-------------------------------------------------------------|-----------------------------------------|------------------------------|------------------|-------|------|-------|--------------------------------------------------|------|------------------------------------------------------------|------------------|------------------|---------------------------------------------------------------------------------------------|------------------|------------------|------------------|------------------|
|             |             |            |                                                             |                                         |                              | Rain             | Anth. | Sil. | Carb. | SWF                                              | CWF  | Cat <sub>sil</sub> <sup>a</sup>                            | SWR <sup>b</sup> | CWR <sup>b</sup> | TWR <sup>b</sup>                                                                            | CSW <sup>c</sup> | CCW <sup>c</sup> | SSW <sup>d</sup> | SSW <sup>e</sup> |
| Qiantang    | Fuyang      |            | 43.81                                                       | 38.32                                   | 1143                         | 9                | 14    | 23   | 54    | 0.66                                             | 1.74 | 6.8                                                        | 17.3             | 45.3             | 62.6                                                                                        | 223              | 459              | 195              | 184              |
|             | Fenshui     | Tonglu     | 2.726                                                       | 3.100                                   | 879                          | 7                | 14    | 18   | 62    | 0.05                                             | 0.16 | 5.5                                                        | 14.7             | 52.1             | 66.8                                                                                        | 167              | 530              | 152              | 146              |
| Cao'e       |             | Huashan    | 2.610                                                       | 3.043                                   | 858                          | 7                | 23    | 26   | 44    | 0.06                                             | 0.11 | 6.8                                                        | 18.2             | 35.4             | 53.5                                                                                        | 269              | 369              | 240              | 229              |
| Ling        | Linhai      |            | 5.400                                                       | 6.613                                   | 817                          | 9                | 22    | 24   | 45    | 0.09                                             | 0.17 | 4.7                                                        | 14.2             | 26.1             | 40.3                                                                                        | 167              | 267              | 143              | 133              |
|             | Yonganxi    | Baizhiao   | 3.184                                                       | 2.475                                   | 1286                         | 14               | 15    | 50   | 21    | 0.06                                             | 0.03 | 9.1                                                        | 24.2             | 11.7             | 35.9                                                                                        | 350              | 119              | 255              | 216              |
|             | Shifengxi   | Shaduan    | 1.731                                                       | 1.482                                   | 1168                         | 11               | 19    | 35   | 36    | 0.03                                             | 0.04 | 7.6                                                        | 21.4             | 24.5             | 45.9                                                                                        | 304              | 249              | 249              | 227              |
| Ou          | Hecheng     |            | 20.65                                                       | 13.45                                   | 1536                         | 20               | 6     | 56   | 18    | 0.36                                             | 0.13 | 10.1                                                       | 26.9             | 9.9              | 36.9                                                                                        | 360              | 101              | 228              | 174              |
|             | Haoxi       | Huangdu    | 1.809                                                       | 1.270                                   | 1447                         | 16               | 8     | 46   | 30    | 0.04                                             | 0.02 | 9.9                                                        | 27.9             | 19.0             | 46.9                                                                                        | 336              | 192              | 246              | 210              |
|             | Xiaoxi      | Jupu       | 5.116                                                       | 3.336                                   | 1534                         | 23               | 0     | 74   | 4     | 0.09                                             | 0.01 | 11.4                                                       | 26.4             | 1.8              | 28.2                                                                                        | 391              | 18               | 202              | 125              |
|             | Nanxi       | Yongjiashi | 1.799                                                       | 1.273                                   | 1413                         | 21               | 9     | 63   | 7     | 0.03                                             | 0.00 | 10.0                                                       | 26.3             | 3.3              | 29.6                                                                                        | 360              | 34               | 200              | 135              |
| Huotong     |             | Yangzhong  | 3.470                                                       | 2.082                                   | 1667                         | 22               | 18    | 54   | 5     | 0.06                                             | 0.00 | 8.3                                                        | 27.3             | 2.1              | 29.4                                                                                        | 305              | 24               | 129              | 59               |
| Ao          |             | Lianjiang  | 2.770                                                       | 3.170                                   | 874                          | 17               | 17    | 48   | 17    | 0.05                                             | 0.02 | 5.1                                                        | 17.3             | 5.4              | 22.7                                                                                        | 188              | 56               | 122              | 95               |
| Min         | Zhuqi       |            | 84.59                                                       | 54.50                                   | 1552                         | 15               | 10    | 48   | 27    | 1.80                                             | 0.94 | 10.3                                                       | 33.0             | 17.3             | 50.2                                                                                        | 390              | 180              | 292              | 252              |
|             | Futun       | Yangkou    | 22.53                                                       | 12.67                                   | 1778                         | 15               | 14    | 49   | 22    | 0.45                                             | 0.21 | 12.0                                                       | 35.8             | 16.2             | 52.0                                                                                        | 460              | 171              | 336              | 286              |
|             | Shaxi       | Shaxian    | 12.87                                                       | 9.922                                   | 1297                         | 13               | 9     | 42   | 36    | 0.26                                             | 0.21 | 8.4                                                        | 26.5             | 21.7             | 48.1                                                                                        | 315              | 222              | 249              | 223              |
|             | Jianxi      | Qilijie    | 24.91                                                       | 14.79                                   | 1685                         | 16               | 10    | 45   | 29    | 0.48                                             | 0.26 | 9.6                                                        | 32.2             | 17.4             | 49.6                                                                                        | 350              | 185              | 250              | 210              |
|             | Youxi       | Youxi      | 5.237                                                       | 4.450                                   | 1177                         | 15               | 8     | 46   | 31    | 0.11                                             | 0.07 | 7.4                                                        | 24.5             | 15.0             | 39.5                                                                                        | 272              | 156              | 205              | 178              |
|             | Dazhangxi   | Yongtai    | 4.205                                                       | 4.034                                   | 1042                         | 15               | 21    | 47   | 17    | 0.08                                             | 0.03 | 6.6                                                        | 20.2             | 7.1              | 27.4                                                                                        | 242              | 73               | 163              | 131              |
| Jin         | Xixi        | Anxi       | 3.004                                                       | 2.466                                   | 1218                         | 9                | 10    | 29   | 52    | 0.06                                             | 0.10 | 7.9                                                        | 24.4             | 42.2             | 66.6                                                                                        | 284              | 430              | 247              | 232              |
|             | Dongxi      | Honglai    | 2.236                                                       | 1.704                                   | 1312                         | 12               | 22    | 28   | 38    | 0.04                                             | 0.04 | 6.8                                                        | 22.9             | 25.6             | 48.5                                                                                        | 226              | 263              | 178              | 158              |
| Jiulong     | Punan       |            | 10.20                                                       | 8.49                                    | 1201                         | 13               | 14    | 28   | 45    | 0.19                                             | 0.29 | 7.3                                                        | 22.2             | 34.0             | 56.2                                                                                        | 263              | 351              | 209              | 188              |
|             | Xi'xi       | zhengdian  | 4.080                                                       | 3.420                                   | 1193                         | 10               | 32    | 25   | 33    | 0.10                                             | 0.11 | 8.0                                                        | 30.7             | 30.9             | 61.6                                                                                        | 288              | 317              | 227              | 203              |
| Zhang       |             | Yunxiao    | 1.011                                                       | 1.038                                   | 974                          | 16               | 25    | 29   | 29    | 0.02                                             | 0.01 | 5.1                                                        | 21.9             | 14.1             | 36.0                                                                                        | 174              | 146              | 114              | 90               |
| Dongxi      |             | Zhao'an    | 1.176                                                       | 0.955                                   | 1231                         | 16               | 41    | 26   | 17    | 0.03                                             | 0.01 | 5.8                                                        | 28.7             | 10.2             | 38.9                                                                                        | 187              | 107              | 93               | 55               |
| Huanggang   |             | Raoping    | 1.637                                                       | 1.621                                   | 1010                         | 15               | 30    | 34   | 21    | 0.04                                             | 0.02 | 6.0                                                        | 22.8             | 11.1             | 33.9                                                                                        | 227              | 115              | 145              | 112              |
| Han         |             | Chao'an    | 24.75                                                       | 29.08                                   | 851                          | 16               | 7     | 38   | 39    | 0.49                                             | 0.50 | 5.4                                                        | 17.0             | 17.0             | 34.0                                                                                        | 208              | 176              | 156              | 135              |

|             |          |       |       |      |    |    |    |    |      |      |     |      |      |      |     |     |     |     |
|-------------|----------|-------|-------|------|----|----|----|----|------|------|-----|------|------|------|-----|-----|-----|-----|
| Ding        | Xikou    | 11.14 | 9.228 | 1207 | 17 | 6  | 46 | 32 | 0.31 | 0.18 | 9.0 | 33.3 | 19.1 | 52.4 | 341 | 196 | 249 | 212 |
| Mei         | Hengshan | 10.29 | 12.95 | 794  | 12 | 13 | 31 | 44 | 0.21 | 0.32 | 5.7 | 16.6 | 24.5 | 41.1 | 212 | 252 | 173 | 157 |
| Whole SECRB |          | 207   | 167   | 1240 |    |    |    |    | 3.95 | 4.09 | 7.8 | 23.7 | 24.5 | 48.1 | 287 | 251 | 218 | 191 |

<sup>a</sup>  $Cat_{sil}$  are calculated based on the sum of cations from silicate weathering.

<sup>b</sup> SWR, CWR and TWR represent silicate weathering rates (assuming all dissolved silica is derived from silicate weathering), carbonate weathering rates and total weathering rates, respectively.

<sup>c</sup>  $CO_2$  consumption rate with assumption that all the protons involved in the weathering reaction are provided by carbonic acid.

<sup>d</sup> Estimated  $CO_2$  consumption rate by silicate weathering when  $H_2SO_4$  from acid precipitation is taken into account.

<sup>e</sup> Estimated  $CO_2$  consumption rate by silicate weathering when  $H_2SO_4$  and  $HNO_3$  from acid precipitation is taken into account.



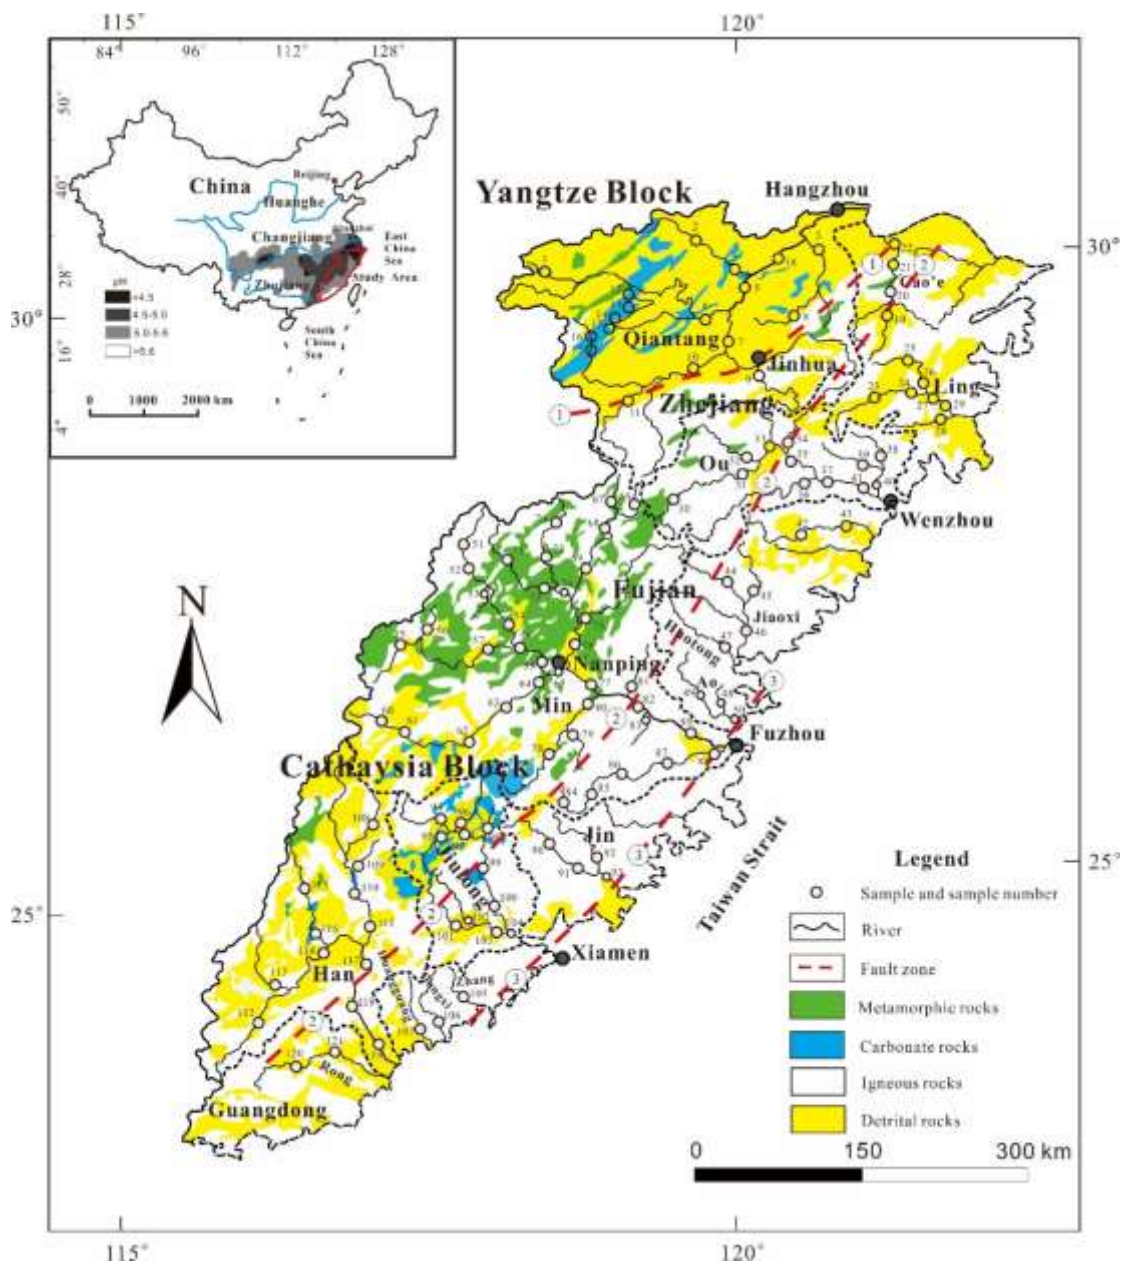

Fig. 1. Sketch map showing the lithology, sampling locations, and sample number of the SECRs drainage basin, and regional rain water pH ranges are shown in the sketch map at the upper-left. (modified from Zhou and Li, 2000; Shu et al., 2009; Xu et al., 2016, rain water acidity distribution of China mainland is from State Environmental Protection Administration of China). ①Shaoxing-Jiangshan fault zone; ②Zhenghe-Dapu fault zone; ③Changle-Nanao fault zone. The figure was created by CorelDraw software version 17.1.

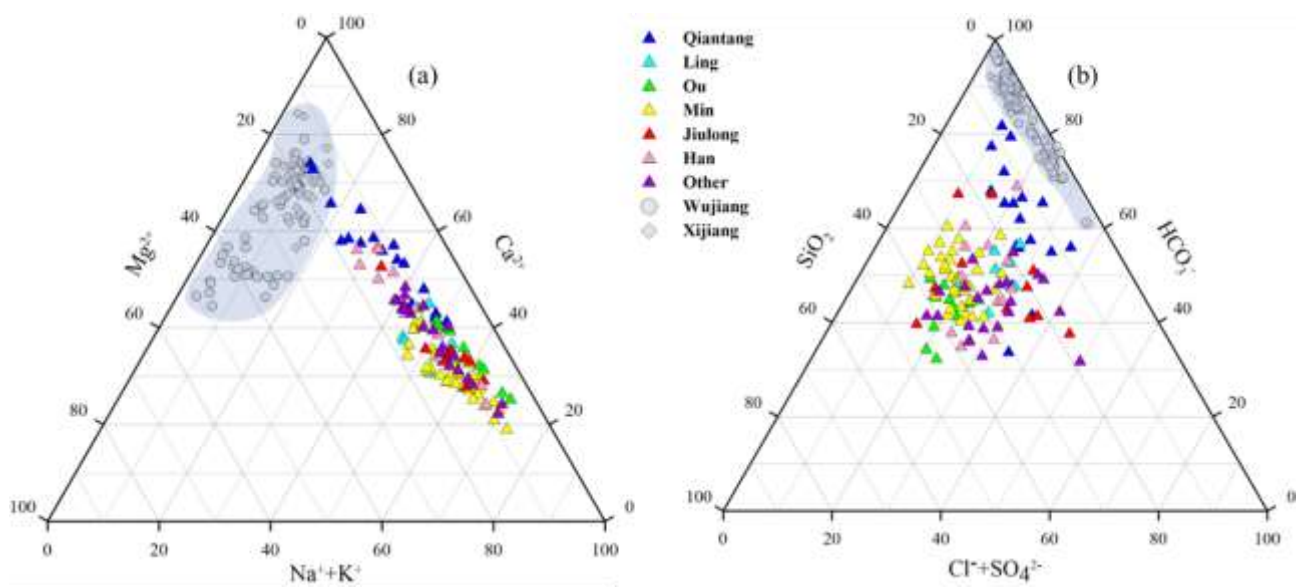

Fig. 2. Ternary diagrams showing cations (a), anions and dissolved  $SiO_2$  (b) compositions of river waters in the SECRB. Chemical compositions from case studies of rivers draining carbonate rocks (the Wujiang and the Xijiang) are also shown for comparison (data from Han and Liu 2004; Xu and Liu 2007, 2010)

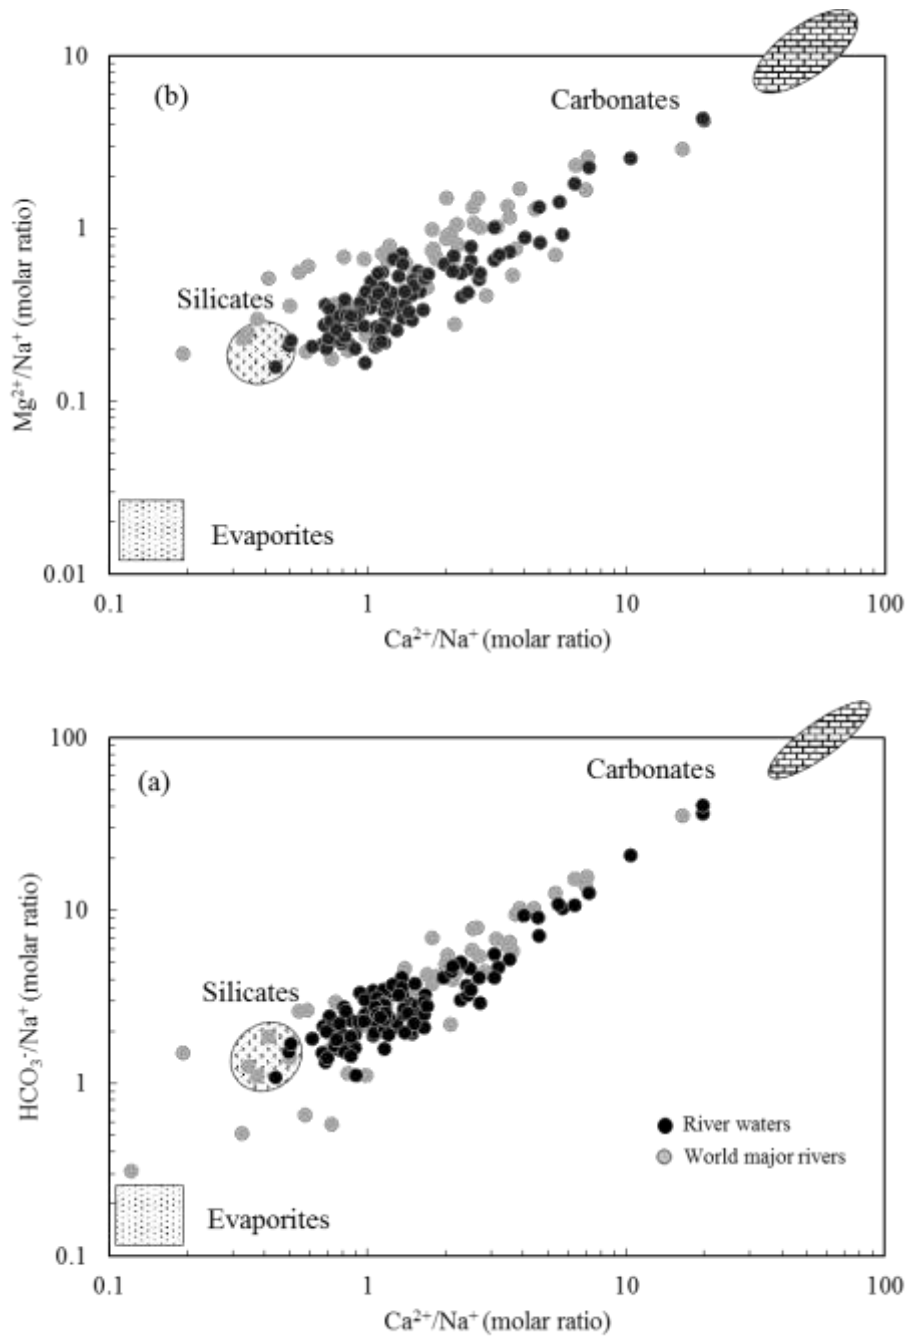

Fig. 3. Mixing diagrams using Na-normalized molar ratios: HCO<sub>3</sub><sup>-</sup>/Na<sup>+</sup> vs. Ca<sup>2+</sup>/Na<sup>+</sup> (a) and Mg<sup>2+</sup>/Na<sup>+</sup> vs. Ca<sup>2+</sup>/Na<sup>+</sup> (b) for the SECRB. The samples mainly cluster on a mixing line between silicate and carbonate end-members. Data for world major rivers are also plotted (data from Gaillardet et al. 1999).

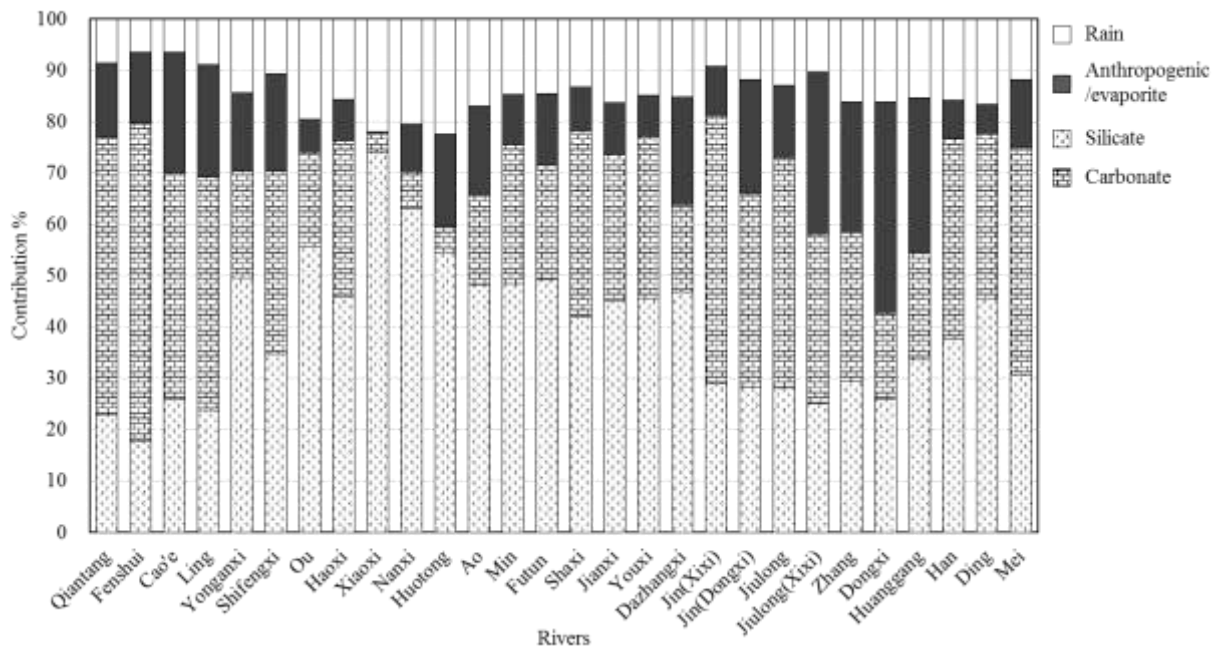

Fig. 4. Calculated contributions (in %) from the different reservoirs to the total cationic load for major rivers and their main tributaries in the SECRB. The cationic load is equal to the sum of  $\text{Na}^+$ ,  $\text{K}^+$ ,  $\text{Ca}^{2+}$  and  $\text{Mg}^{2+}$  from the different reservoirs.

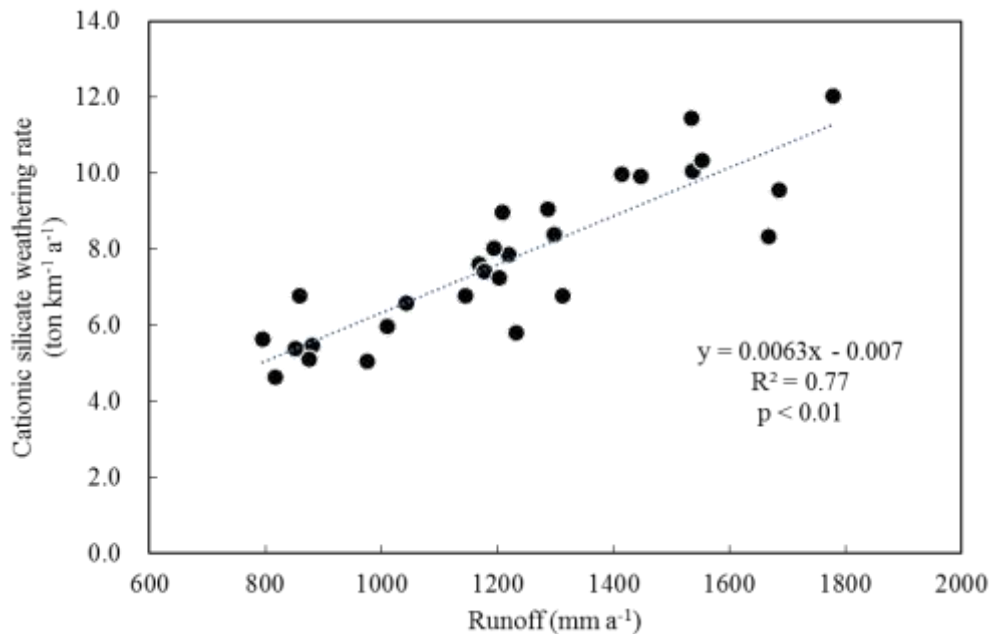

Fig. 5. Plots of the cationic-silicate weathering rate ( $\text{Cat}_{\text{sil}}$ ) vs. runoff for the SECRB, showing that the silicate weathering rates is controlled by the runoff.

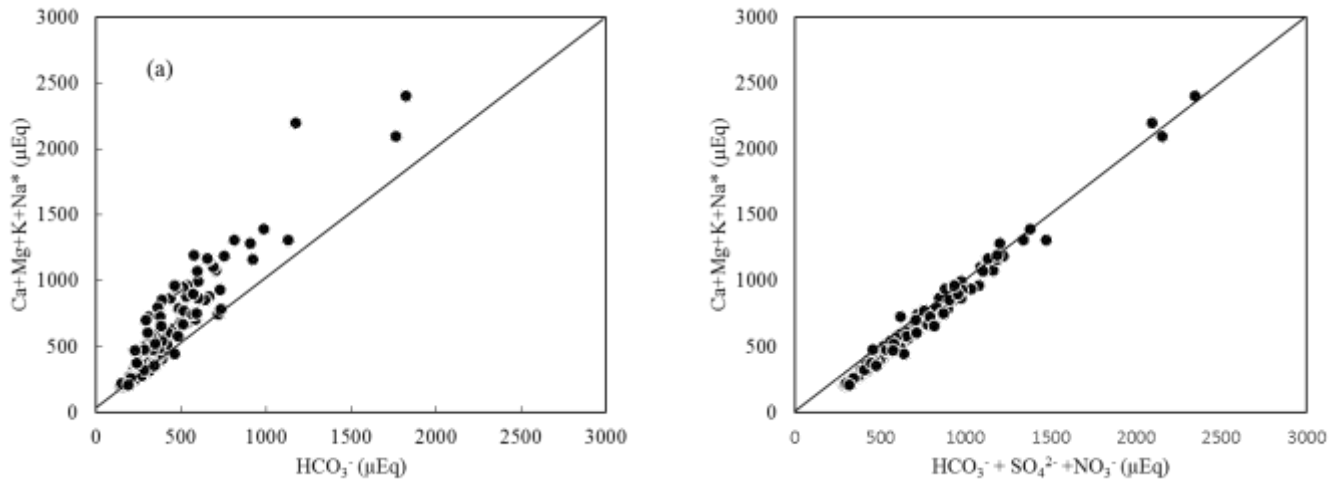

Fig. 6. Plots of total cations derived from carbonate and silicate weathering vs.  $\text{HCO}_3^-$  (a) and  $\text{HCO}_3^- + \text{SO}_4^{2-} + \text{NO}_3^-$  (b) for river waters in the SECRB.

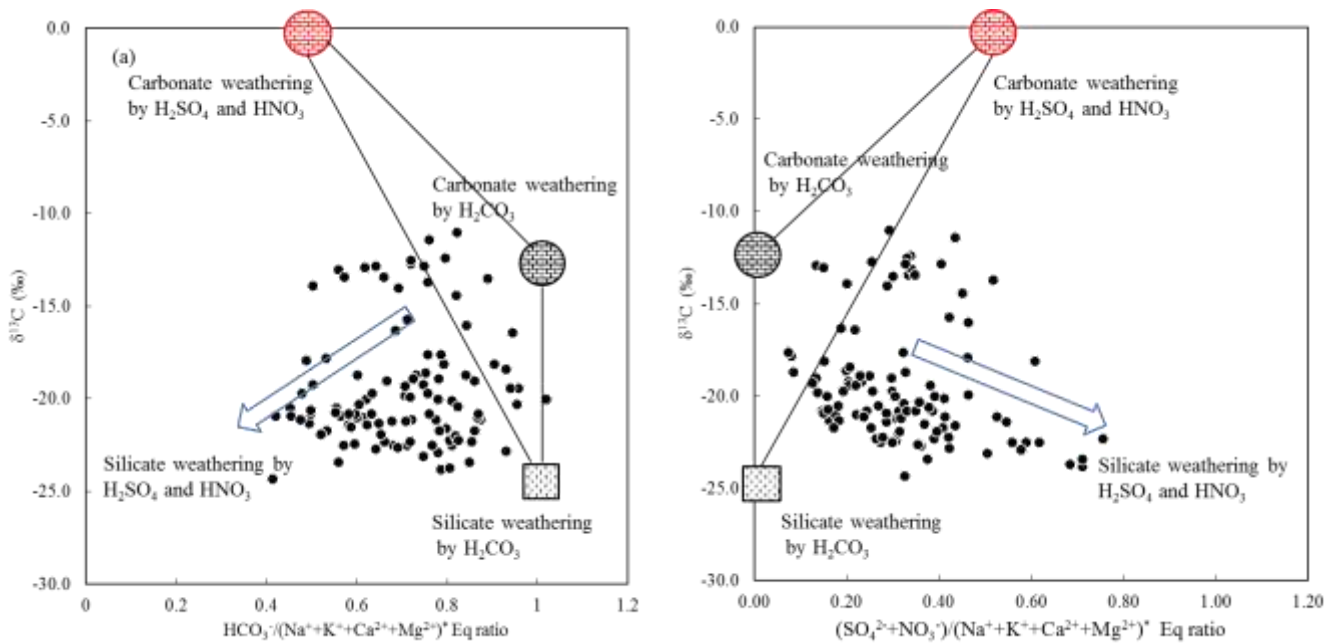

Fig. 7.  $\delta^{13}\text{C}_{\text{DIC}}$  vs.  $\text{HCO}_3^- / (\text{Na}^+ + \text{K}^+ + \text{Ca}^{2+} + \text{Mg}^{2+})^*$  (a) and  $(\text{SO}_4^{2-} + \text{NO}_3^-) / (\text{Na}^+ + \text{K}^+ + \text{Ca}^{2+} + \text{Mg}^{2+})^*$  equivalent ratio (b) in river waters draining the SECRB (\* means corrected for atmospheric and anthropogenic inputs). The plot show that most waters deviate from the three endmember mixing area (carbonate weathering by carbonic acid and sulfuric acid and silicate weathering by carbonic acid), illustrating the effect of sulfuric and nitric acid on silicate weathering.
